# Supplementary material for: The effect of physical exercise on college students' chemistry learning engagement: the chain mediating role of self-efficacy and autonomous motivation
Source: Research Square preprint supplement (doi:10.21203/rs.3.rs-7080316/v1), 2025-08-29
Supplement: Supplementary file 1 [file 80903601b346a9ac40c24359.xlsx]

## Sheet: 6.4数据
序号	提交答卷时间	所用时间	来源	来源详情	来自IP	@1、您的性别：	@2、您的年级	@3、您的年龄	@4、我期望实现自己的梦想	@5、我做事干练	@6、我觉得自己已经很出色了	@7、我希望通过自己的努力创造美好未来	@8、我做事很有条理	@9、我觉着自己是个成功的人	@10、我渴望成功	@11、我是个果断的人	@12、我觉得别人很欣赏我	@13、我决定自己有卓越的成就	@14、我是一个井井有条的人，但做事并不刻板	@15、我是一个出色的人	@16、把事情越做越好，我很兴奋	@17、我能很好的应付意外事件	@18、我是个受人欢迎的人	@19、我希望自己能够脱颖而出	@20、做任何事情，我能及时开始，及时结束	@21、做任何我认为自己有很多优点	@22、我努力让自己更佳出色	@23、我善于协调和管理	@24、我更佳主义自己的优点而不是缺点	@25、我对自己的将来有美好的期望	@26、我做事积极主动	@27、我希望自己能成为一个不寻常的人	@28、我平时总是事前做那些最重要的事情，时间	@29、我有很高的志向	@30、如果我尽力去做的话，我总能是能够解决问	@31、即使别人反对我，我仍有办法取得我所要的	@32、对我来说，坚持理想和达成目标是轻而易举	@33、我自信能够有效的应对任何突如其来的事情	@34、以我的才智，我能应付意料之外的情况	@35、如果我付出必要的努力，我一定能解决大多	@36、我能冷静的面对困难，因为我信赖自己处理	@37、面对一个难题时，我通常能找到几个解决的	@38、有麻烦的时候，我通常能想到一些应对的方	@39、无论什么事情在我身上发生，我都能应对自	@40、我锻炼是因为别人说我应该锻炼	@41、我锻炼是因为如果我不锻炼，别人会不高兴	@42、朋友或者家人会给我锻炼方面的压力	@43、我参与锻炼是因为朋友家人同伴说我应该去	@44、我因为锻炼有趣而去锻炼
5	2025/5/17 17:30:44	272秒	微信	N/A	110.88.31.247(福建-三明)	2	1	3	1	2	2	1	2	5	3	3	3	2	5	2	2	4	4	4	3	2	1	1	1	1	2	4	4	1	1	1	2	2	2	2	2	2	2	2	2	1	3	1	2
401	2025/5/17 17:56:12	206秒	微信	N/A	58.52.158.5(湖北-咸宁)	2	2	5	3	1	1	1	2	2	1	2	3	2	3	1	1	2	2	1	4	2	1	2	1	2	1	1	2	1	1	2	2	1	1	2	1	2	2	2	1	1	2	1	2
417	2025/5/17 17:57:44	246秒	微信	N/A	140.250.150.90(山东-济南)	1	2	4	3	2	2	5	1	2	2	1	2	1	1	1	2	1	1	1	1	2	2	2	1	2	2	1	3	3	1	1	3	1	1	2	1	2	4	2	2	2	2	1	1
106	2025/5/17 17:37:23	230秒	微信	N/A	58.52.153.62(湖北-咸宁)	2	2	4	1	4	1	2	1	1	3	2	2	2	2	2	2	1	3	2	2	1	2	3	2	2	1	1	3	1	2	2	1	2	2	2	3	2	1	1	1	2	2	2	1
1	2025/5/17 17:30:00	277秒	微信	N/A	140.237.13.195(福建-莆田)	1	1	1	1	1	2	3	1	1	5	3	3	1	1	5	3	1	2	2	3	1	3	4	1	2	2	2	2	2	1	4	1	1	3	3	1	3	4	2	1	1	4	1	2
6	2025/5/17 17:30:45	213秒	微信	N/A	110.88.28.83(福建-三明)	2	1	3	3	3	1	1	1	2	3	4	2	1	2	3	1	1	2	1	3	2	1	2	2	3	2	5	3	4	2	1	3	3	2	1	1	1	1	4	1	2	1	1	2
82	2025/5/17 17:35:41	299秒	微信	N/A	27.150.193.93(福建-莆田)	1	2	7	1	2	1	1	2	1	2	1	1	1	2	1	2	1	1	1	1	1	2	1	1	2	2	1	2	1	1	1	3	1	2	1	2	4	3	2	3	1	2	1	2
267	2025/5/17 17:47:41	244秒	微信	N/A	110.86.176.30(福建-莆田)	1	2	4	2	2	2	1	1	2	1	2	1	1	1	2	4	3	1	3	4	1	2	2	2	2	2	4	1	1	1	2	1	2	3	5	5	1	2	1	2	2	2	1	2
148	2025/5/17 17:39:49	293秒	微信	N/A	171.41.131.11(湖北-荆门)	2	1	1	3	3	1	2	1	2	2	2	3	2	1	4	2	2	2	2	2	3	3	1	3	1	2	2	1	1	2	2	2	2	1	1	1	2	1	1	5	2	2	1	3
233	2025/5/17 17:45:34	194秒	微信	N/A	111.72.196.212(江西-鹰潭)	2	1	1	2	3	4	2	2	2	4	2	1	2	2	2	1	1	2	1	2	1	2	1	5	1	2	1	3	3	2	1	2	1	2	1	1	2	4	1	1	5	2	3	1
470	2025/5/17 18:01:39	211秒	微信	N/A	121.232.71.63(江苏-南通)	1	2	5	1	1	4	1	1	4	2	3	2	1	4	1	4	1	1	2	1	1	1	1	2	2	2	3	5	4	2	2	1	2	1	2	2	2	3	1	1	1	3	2	1
14	2025/5/17 17:31:27	277秒	微信	N/A	222.189.106.25(江苏-连云港)	1	1	4	4	1	2	3	2	3	2	1	2	1	2	1	5	2	2	4	1	1	2	1	2	1	2	4	1	1	1	1	2	2	2	2	1	3	2	2	1	2	1	1	2
348	2025/5/17 17:52:46	220秒	微信	N/A	111.72.194.18(江西-鹰潭)	2	2	7	2	2	3	2	2	1	1	2	4	2	1	1	1	3	1	2	3	5	2	1	1	1	4	1	4	2	1	3	2	2	1	1	2	3	1	4	3	1	2	2	3
408	2025/5/17 17:56:42	190秒	微信	N/A	125.87.86.27(重庆-重庆)	2	2	7	2	1	3	3	2	3	1	2	2	5	2	1	2	1	2	2	2	2	1	5	3	2	1	2	2	1	1	1	1	1	1	4	1	1	2	1	2	3	1	1	2
299	2025/5/17 17:49:49	182秒	微信	N/A	118.213.46.248(青海-黄南)	1	1	1	1	2	1	2	1	4	1	1	2	2	1	1	2	2	2	1	1	1	3	3	5	2	4	4	4	5	1	2	1	1	1	1	3	1	2	2	2	2	4	1	1
309	2025/5/17 17:50:26	254秒	微信	N/A	125.87.87.138(重庆-重庆)	2	2	6	1	5	2	2	2	1	3	4	5	3	5	4	1	1	3	3	3	3	2	1	2	2	1	1	2	2	2	2	2	2	1	2	1	1	2	2	2	1	2	2	2
13	2025/5/17 17:31:25	247秒	微信	N/A	180.105.129.191(江苏-连云港)	1	2	5	1	2	4	3	1	3	1	1	2	1	3	1	3	1	2	1	2	2	2	2	4	4	5	4	4	5	2	3	2	1	2	1	2	4	1	1	1	1	1	4	1
78	2025/5/17 17:35:22	267秒	微信	N/A	111.72.199.88(江西-鹰潭)	2	1	3	2	2	2	2	1	1	2	1	2	1	1	2	2	2	1	3	1	1	2	1	1	1	2	2	2	2	2	3	1	1	4	3	1	5	1	3	2	2	4	1	1
195	2025/5/17 17:42:58	210秒	微信	N/A	223.221.75.83(青海-黄南)	1	1	3	2	2	4	1	1	1	1	1	2	4	1	2	1	2	2	3	2	1	5	3	2	1	4	1	1	2	1	4	2	1	1	5	3	5	3	1	2	1	1	3	2
571	2025/5/17 18:08:13	231秒	微信	N/A	183.130.248.61(浙江-温州)	1	1	2	4	2	1	1	1	3	3	1	1	5	3	2	2	2	5	2	2	1	2	5	1	1	1	1	1	3	2	3	5	1	2	3	3	3	3	2	2	4	4	5	2
280	2025/5/17 17:48:41	241秒	微信	N/A	111.72.131.188(江西-宜春)	2	2	4	2	4	2	2	1	2	2	2	1	3	1	3	2	2	1	2	2	2	1	4	1	4	2	1	5	3	1	5	2	3	2	4	1	3	4	2	2	1	2	2	5
382	2025/5/17 17:54:50	199秒	微信	N/A	111.72.195.212(江西-鹰潭)	2	1	2	4	1	1	5	3	2	2	5	3	2	2	3	5	2	3	2	4	2	2	1	2	2	4	1	1	1	2	4	2	4	4	5	2	3	1	3	2	1	1	1	1
496	2025/5/17 18:03:19	283秒	微信	N/A	120.43.35.7(福建-宁德)	1	2	7	5	3	4	2	5	4	3	5	3	4	4	1	4	1	2	1	4	5	2	1	1	2	2	3	2	2	1	4	1	3	4	4	4	1	4	5	1	1	1	1	1
51	2025/5/17 17:33:48	290秒	微信	N/A	140.250.147.162(山东-济南)	2	1	2	4	5	4	4	5	5	3	4	4	2	2	1	1	2	2	1	2	1	2	3	4	2	5	4	5	4	4	4	2	4	2	3	4	4	4	5	4	3	4	3	2
810	2025/5/17 18:29:29	238秒	微信	N/A	123.189.112.114(辽宁-鞍山)	1	1	1	1	2	5	2	1	2	3	3	2	3	3	2	3	3	3	2	5	1	3	5	5	5	4	5	4	4	4	3	4	3	4	2	3	4	4	5	2	1	2	1	1
829	2025/5/17 18:31:01	216秒	微信	N/A	183.130.155.54(浙江-温州)	2	1	1	5	3	4	3	4	4	4	4	5	4	4	5	4	3	2	4	5	4	4	3	1	1	3	3	5	1	4	5	5	2	4	3	3	4	4	3	5	1	3	5	2
703	2025/5/17 18:18:49	294秒	微信	N/A	123.189.115.172(辽宁-鞍山)	2	1	4	5	4	2	4	4	5	5	3	4	5	4	5	2	4	5	4	4	4	5	3	1	3	3	1	4	4	1	1	2	1	1	2	1	1	2	2	4	4	4	4	2
542	2025/5/17 18:06:14	265秒	微信	N/A	58.52.182.96(湖北-咸宁)	2	2	4	4	1	1	5	1	1	1	1	1	3	1	2	2	1	1	3	1	5	1	2	2	2	1	2	1	1	1	1	2	2	2	2	2	2	1	3	1	2	3	5	4
71	2025/5/17 17:35:06	293秒	微信	N/A	171.41.150.52(湖北-荆门)	2	1	2	2	4	2	2	1	2	2	2	2	2	2	1	4	1	2	4	5	1	1	2	1	1	2	1	3	1	1	1	4	1	4	2	4	2	2	4	1	2	3	3	4
483	2025/5/17 18:02:24	265秒	微信	N/A	180.120.9.83(江苏-南通)	2	2	4	1	2	2	2	2	2	3	3	1	3	1	3	1	1	1	2	2	4	1	1	3	3	4	2	4	3	2	4	3	2	1	1	5	4	2	2	1	4	1	1	3
69	2025/5/17 17:34:58	246秒	微信	N/A	120.43.58.138(福建-宁德)	1	1	2	4	1	3	2	3	1	4	3	1	1	2	2	2	1	2	4	5	2	2	2	1	3	2	2	2	1	1	3	3	1	3	3	3	4	2	4	1	2	2	1	3
687	2025/5/17 18:17:19	282秒	微信	N/A	111.72.134.85(江西-宜春)	1	2	6	2	1	3	3	2	5	2	1	2	4	2	2	5	3	3	4	1	2	2	3	1	1	1	1	3	2	1	4	2	4	2	2	5	4	5	1	5	4	4	3	5
662	2025/5/17 18:15:23	248秒	微信	N/A	111.72.195.203(江西-鹰潭)	2	2	6	4	3	5	3	1	2	2	1	3	2	4	4	3	3	4	3	4	1	2	4	5	4	5	4	5	5	1	4	5	3	2	2	3	5	2	5	2	4	4	5	1
643	2025/5/17 18:13:16	219秒	微信	N/A	118.113.246.123(四川-成都)	1	1	2	5	2	5	1	2	4	1	1	1	1	2	2	4	1	3	4	2	3	1	1	2	1	2	2	2	2	2	4	3	4	5	4	4	4	5	5	3	4	5	4	4
451	2025/5/17 18:00:31	280秒	微信	N/A	117.90.220.229(江苏-镇江)	1	1	4	4	2	2	3	1	4	2	3	3	5	4	4	4	1	2	4	1	1	1	2	1	1	4	1	1	1	2	1	1	2	2	2	1	1	1	4	3	2	3	2	5
509	2025/5/17 18:04:09	192秒	微信	N/A	220.190.44.94(浙江-温州)	2	1	4	1	2	1	1	1	2	1	1	1	3	4	5	5	3	4	3	5	3	2	2	1	3	4	1	2	4	2	4	1	3	1	2	2	2	1	2	2	2	2	3	1
93	2025/5/17 17:36:36	232秒	微信	N/A	125.87.95.74(重庆-重庆)	2	2	7	2	1	2	1	3	2	1	1	1	2	4	3	5	4	4	5	5	4	2	3	5	5	5	3	1	3	2	5	3	2	3	2	1	1	2	1	2	5	3	1	1
98	2025/5/17 17:37:01	265秒	微信	N/A	122.230.57.116(浙江-湖州)	1	2	6	4	5	4	4	4	5	4	2	4	5	4	5	1	4	5	4	4	3	1	2	2	4	5	4	3	5	3	1	2	5	1	3	2	2	2	2	1	3	2	2	1
359	2025/5/17 17:53:25	209秒	微信	N/A	110.86.173.182(福建-莆田)	1	1	2	3	2	1	2	2	1	1	2	1	2	1	1	1	1	2	1	1	2	1	3	1	1	1	4	1	4	2	1	2	2	1	1	1	3	1	2	2	2	1	1	2
402	2025/5/17 17:56:18	270秒	微信	N/A	117.42.94.228(江西-抚州)	1	1	3	2	1	1	1	2	2	2	2	2	4	2	4	2	3	2	1	1	1	3	2	2	1	2	3	2	1	4	2	1	2	4	1	1	2	2	1	1	2	1	2	3
292	2025/5/17 17:49:25	187秒	微信	N/A	202.101.213.212(江西-抚州)	1	1	1	1	2	2	1	3	1	3	2	2	2	2	1	1	2	3	2	1	2	1	2	3	3	5	5	5	4	2	1	2	1	4	3	2	1	1	4	2	2	1	3	3
563	2025/5/17 18:07:42	223秒	微信	N/A	110.89.120.124(福建-三明)	2	1	2	2	1	1	1	3	3	2	4	3	2	1	2	2	2	1	1	2	1	2	1	1	2	2	1	4	3	2	2	2	2	1	2	2	1	4	4	2	2	1	2	3
510	2025/5/17 18:04:12	239秒	微信	N/A	218.87.205.137(江西-抚州)	1	1	2	2	1	1	2	1	1	1	1	1	1	3	5	2	1	5	2	5	2	4	3	3	1	1	3	3	1	2	2	4	1	1	3	2	1	4	4	2	2	2	2	4
528	2025/5/17 18:05:31	283秒	微信	N/A	222.77.215.128(福建-莆田)	1	1	1	2	2	1	1	2	1	1	2	1	1	2	2	4	5	1	4	3	5	3	2	1	3	1	2	4	2	1	1	1	1	2	1	2	2	2	1	4	4	5	5	2
651	2025/5/17 18:14:14	278秒	微信	N/A	111.72.129.44(江西-宜春)	2	1	2	1	2	1	1	1	2	2	1	2	1	3	5	4	4	3	5	3	4	2	1	3	3	4	1	2	2	4	1	1	1	1	3	1	1	2	3	4	3	4	2	4
934	2025/5/17 18:45:47	268秒	微信	N/A	117.24.176.225(福建-泉州)	2	1	4	1	2	2	2	1	2	1	4	1	2	2	1	2	1	2	1	2	3	2	1	1	2	2	1	1	2	2	2	3	1	2	1	3	2	1	2	2	2	1	1	5
604	2025/5/17 18:10:03	261秒	微信	N/A	27.152.220.2(福建-泉州)	2	2	5	1	1	2	1	1	3	3	2	2	1	2	2	1	2	2	2	2	2	2	2	2	2	2	1	1	1	1	4	2	5	4	2	1	2	1	3	2	3	5	3	4
821	2025/5/17 18:30:18	222秒	微信	N/A	220.190.49.242(浙江-温州)	2	2	6	1	1	3	5	1	2	1	1	3	1	2	3	2	1	1	1	2	3	2	2	2	1	1	2	1	1	2	1	1	1	1	4	1	2	1	2	4	4	4	5	5
149	2025/5/17 17:39:56	197秒	微信	N/A	183.130.155.44(浙江-温州)	1	2	4	2	1	3	2	1	1	2	2	3	1	2	1	2	1	2	4	2	2	2	1	2	2	2	1	1	1	2	2	1	1	3	3	2	2	1	1	1	3	1	2	2
3	2025/5/17 17:30:29	291秒	微信	N/A	121.235.136.57(江苏-无锡)	1	1	1	2	2	1	1	2	1	3	2	2	2	1	2	1	1	1	1	2	3	2	1	3	2	1	4	3	1	1	1	1	2	1	1	4	2	1	1	2	1	1	2	2
661	2025/5/17 18:15:13	219秒	微信	N/A	106.110.186.2(江苏-连云港)	2	2	5	1	5	3	1	1	2	1	1	2	4	2	3	2	3	2	3	3	1	1	1	1	1	4	1	3	3	2	1	1	2	1	2	2	1	2	3	5	1	1	4	1
908	2025/5/17 18:41:37	256秒	微信	N/A	125.87.83.76(重庆-重庆)	2	2	5	3	1	1	2	1	1	4	1	1	2	1	1	2	2	2	1	3	2	2	2	3	1	1	2	2	1	2	2	1	3	2	1	2	2	1	2	2	5	4	3	2
229	2025/5/17 17:45:05	185秒	微信	N/A	125.125.139.159(浙江-湖州)	1	2	6	2	3	1	1	4	1	2	3	1	1	3	5	1	1	1	3	1	2	2	1	2	2	1	2	2	1	1	3	3	1	1	3	2	3	4	3	1	2	1	3	4
85	2025/5/17 17:35:54	277秒	微信	N/A	220.190.50.81(浙江-温州)	2	1	3	1	2	3	2	2	3	2	1	2	2	2	1	2	2	3	1	2	2	1	3	3	3	1	4	3	2	3	3	1	2	1	2	2	3	1	2	5	4	4	4	1
90	2025/5/17 17:36:23	229秒	微信	N/A	222.189.106.58(江苏-连云港)	2	1	2	1	2	5	2	3	4	4	3	1	5	2	4	4	2	4	5	2	4	1	2	3	2	1	2	2	1	1	5	3	1	1	5	4	3	3	3	1	1	2	1	1
499	2025/5/17 18:03:28	256秒	微信	N/A	180.127.139.228(江苏-连云港)	1	1	3	4	2	5	4	3	4	4	5	4	4	2	2	1	2	2	1	1	1	2	3	5	5	2	5	3	5	4	4	3	4	5	5	4	4	4	4	5	1	4	5	5
365	2025/5/17 17:53:49	227秒	微信	N/A	183.142.122.4(浙江-湖州)	1	1	2	3	3	5	5	3	4	3	2	3	5	1	2	5	2	5	3	4	3	4	5	4	5	5	4	5	4	1	1	2	1	1	5	2	3	1	2	3	3	3	1	3
462	2025/5/17 18:01:09	200秒	微信	N/A	125.87.89.59(重庆-重庆)	2	1	3	2	2	1	1	1	1	1	1	2	3	3	1	1	1	2	1	2	2	2	1	1	1	4	2	4	2	1	1	2	2	1	1	1	4	5	2	3	5	4	4	5
129	2025/5/17 17:38:48	237秒	微信	N/A	220.190.42.237(浙江-温州)	1	2	7	4	2	2	1	3	2	2	2	4	1	3	2	2	2	5	2	2	4	1	1	1	1	3	4	1	1	2	2	2	1	2	2	2	3	2	3	5	5	5	3	5
493	2025/5/17 18:03:12	284秒	微信	N/A	59.58.149.80(福建-莆田)	1	1	2	2	1	2	1	2	1	2	1	1	2	2	2	3	1	2	2	1	2	1	5	4	4	3	4	4	4	4	3	1	1	2	1	2	3	5	4	1	1	2	1	5
42	2025/5/17 17:33:13	252秒	微信	N/A	140.237.14.16(福建-莆田)	1	2	5	2	1	4	2	1	2	2	3	2	2	2	2	2	2	2	2	1	1	4	1	2	1	4	4	5	4	4	2	5	5	3	3	4	5	5	3	2	1	1	3	1
369	2025/5/17 17:53:53	209秒	微信	N/A	171.41.131.94(湖北-荆门)	1	1	1	1	3	4	5	4	2	4	2	2	2	4	2	1	4	1	2	3	2	3	3	2	1	1	2	1	1	4	4	4	4	4	4	5	4	4	4	1	2	1	2	3
376	2025/5/17 17:54:28	218秒	微信	N/A	117.90.219.140(江苏-镇江)	2	2	5	1	2	2	3	1	1	1	1	1	1	3	3	4	4	4	2	4	5	4	2	4	1	2	2	4	1	2	2	1	2	2	1	2	1	2	2	2	2	2	1	3
467	2025/5/17 18:01:21	212秒	微信	N/A	111.72.200.114(江西-鹰潭)	1	1	4	1	3	5	4	2	4	4	4	2	1	5	2	3	1	5	3	3	4	2	1	2	2	1	2	1	3	4	2	2	2	5	1	2	1	2	3	2	2	3	1	3
472	2025/5/17 18:01:52	282秒	微信	N/A	111.72.199.186(江西-鹰潭)	1	2	5	3	3	5	2	3	5	3	2	2	4	1	2	1	1	5	2	3	4	4	1	2	3	1	4	4	3	1	3	3	1	1	4	3	3	4	1	4	5	1	2	2
431	2025/5/17 17:59:02	238秒	微信	N/A	125.87.94.209(重庆-重庆)	1	2	5	3	1	2	4	1	5	2	3	1	5	4	5	5	4	4	4	5	4	5	5	5	5	4	5	3	5	1	2	2	1	3	4	1	5	5	2	1	2	1	4	2
130	2025/5/17 17:38:49	290秒	微信	N/A	125.87.83.247(重庆-重庆)	1	2	6	4	5	1	3	1	1	1	1	2	1	2	2	2	1	1	1	3	2	4	1	1	1	1	1	1	2	3	1	3	1	2	5	5	2	2	4	1	2	1	1	2
234	2025/5/17 17:45:39	260秒	微信	N/A	59.59.213.241(福建-三明)	1	2	4	3	1	1	2	1	2	2	3	1	3	1	2	1	2	3	2	1	3	1	5	4	4	4	5	4	2	3	5	3	1	2	2	1	4	5	3	2	4	4	5	2
573	2025/5/17 18:08:27	241秒	微信	N/A	183.142.125.60(浙江-湖州)	1	2	7	3	4	5	4	5	4	2	5	3	4	4	3	4	3	4	5	3	2	3	4	4	5	4	1	1	2	3	4	4	5	2	4	5	3	4	3	1	1	2	2	1
138	2025/5/17 17:39:12	268秒	微信	N/A	27.150.193.113(福建-莆田)	1	2	6	4	5	5	3	2	4	4	4	4	4	4	4	4	4	3	4	5	2	3	3	2	4	5	2	2	3	4	4	5	4	3	4	3	5	4	3	1	1	1	3	2
152	2025/5/17 17:40:12	281秒	微信	N/A	114.223.190.239(江苏-无锡)	1	1	3	1	2	1	3	1	1	2	3	1	2	4	1	1	2	1	1	2	2	4	2	2	2	1	1	2	1	5	4	3	5	2	5	4	4	5	3	1	1	5	2	1
151	2025/5/17 17:40:08	288秒	微信	N/A	220.190.42.207(浙江-温州)	1	2	5	1	2	1	3	1	2	4	4	2	1	2	1	2	1	1	1	4	4	1	3	5	3	3	2	2	2	2	2	1	2	1	1	2	2	1	1	1	4	2	2	3
448	2025/5/17 18:00:12	236秒	微信	N/A	125.109.52.87(浙江-温州)	1	2	6	2	1	1	1	2	3	2	2	2	2	2	2	2	4	2	1	1	2	2	1	1	2	2	2	1	1	2	2	1	1	1	1	1	3	1	2	1	1	4	1	1
385	2025/5/17 17:54:57	285秒	微信	N/A	27.150.127.229(福建-宁德)	1	1	4	2	2	1	2	1	2	1	2	2	2	1	3	2	2	2	2	1	1	1	2	4	1	2	2	2	3	4	1	1	2	4	3	2	2	1	1	5	4	2	4	2
186	2025/5/17 17:42:27	187秒	微信	N/A	49.79.138.179(江苏-南通)	2	2	4	3	4	1	1	2	4	4	2	1	1	2	1	1	2	1	2	1	1	1	4	1	2	2	3	2	2	3	4	2	4	2	1	1	1	3	3	1	1	2	2	4
143	2025/5/17 17:39:30	226秒	微信	N/A	114.232.125.81(江苏-南通)	1	2	4	4	1	2	3	3	1	1	1	1	2	3	3	4	1	1	4	1	1	1	2	2	3	1	1	3	2	2	4	2	5	2	1	2	4	1	2	2	3	1	2	3
323	2025/5/17 17:51:18	301秒	微信	N/A	111.72.197.78(江西-鹰潭)	1	2	7	2	3	2	1	1	1	1	5	3	2	1	2	1	4	2	1	5	3	2	3	2	2	4	2	1	1	1	1	1	2	5	2	4	4	1	4	4	1	5	5	3
373	2025/5/17 17:54:15	215秒	微信	N/A	114.229.32.103(江苏-镇江)	2	1	1	2	3	2	1	1	4	1	4	2	3	5	3	2	4	1	2	3	3	3	2	2	1	2	1	3	3	1	2	1	1	3	1	1	1	2	3	3	2	3	5	1
630	2025/5/17 18:11:56	206秒	微信	N/A	117.27.114.158(福建-三明)	1	2	4	1	4	1	2	2	2	3	1	4	1	2	2	2	1	5	2	2	1	2	2	2	2	1	2	1	1	1	2	1	3	1	2	3	1	1	2	2	2	3	2	1
120	2025/5/17 17:38:16	311秒	微信	N/A	222.189.106.44(江苏-连云港)	1	2	6	4	2	2	3	1	1	2	1	1	2	3	2	1	1	1	1	3	2	1	3	3	3	2	3	2	3	2	2	2	1	2	1	2	2	2	1	3	3	3	1	1
156	2025/5/17 17:40:34	207秒	微信	N/A	111.72.197.176(江西-鹰潭)	2	2	6	2	2	2	1	1	1	2	1	2	1	1	3	1	2	3	1	1	2	2	5	5	5	5	3	3	2	1	1	1	3	2	2	4	1	1	4	1	1	2	3	1
157	2025/5/17 17:40:35	239秒	微信	N/A	117.90.219.84(江苏-镇江)	1	1	4	3	1	1	2	2	1	3	1	2	2	1	2	2	2	1	2	1	3	1	2	4	5	4	5	3	4	1	2	1	2	2	1	2	4	4	2	2	1	1	2	2
346	2025/5/17 17:52:43	235秒	微信	N/A	110.88.28.130(福建-三明)	2	1	2	2	2	1	4	2	3	3	4	1	1	3	1	2	2	1	4	4	4	2	2	3	3	1	4	1	2	3	2	1	1	3	2	1	5	3	2	1	5	1	3	1
140	2025/5/17 17:39:15	229秒	微信	N/A	220.161.241.56(福建-宁德)	1	1	2	1	1	1	3	1	1	1	4	1	1	2	1	1	3	1	1	2	1	1	2	1	1	1	2	1	2	2	1	1	2	2	2	2	1	1	1	1	2	5	1	1
642	2025/5/17 18:13:09	274秒	微信	N/A	125.87.91.8(重庆-重庆)	2	2	6	1	2	2	1	1	2	2	1	2	1	1	2	2	1	1	1	2	2	2	1	1	2	1	2	2	2	1	2	2	1	2	2	2	2	1	1	4	2	1	2	5
218	2025/5/17 17:44:22	237秒	微信	N/A	117.86.65.54(江苏-南通)	2	1	1	1	2	1	1	2	1	2	1	2	1	2	5	3	2	2	4	1	1	1	2	2	4	2	1	1	2	1	1	1	2	1	2	4	4	4	1	2	1	3	2	1
107	2025/5/17 17:37:26	248秒	微信	N/A	222.189.106.10(江苏-连云港)	1	1	3	1	2	1	2	1	1	1	2	2	1	4	2	5	3	3	3	4	3	3	2	2	2	2	2	3	2	1	2	2	2	1	1	1	1	2	1	2	1	3	1	4
204	2025/5/17 17:43:32	181秒	微信	N/A	123.189.112.78(辽宁-鞍山)	2	1	2	1	3	2	2	2	1	1	1	1	2	2	1	1	2	1	2	1	4	2	1	1	1	3	1	3	1	3	2	1	2	1	2	1	2	1	2	5	3	5	4	1
878	2025/5/17 18:37:24	186秒	微信	N/A	111.72.197.251(江西-鹰潭)	2	2	7	1	2	1	2	2	1	1	3	2	1	5	2	2	3	2	4	1	1	2	1	2	4	2	2	2	1	1	3	3	2	3	2	1	4	4	4	2	1	1	1	5
901	2025/5/17 18:40:37	228秒	微信	N/A	171.41.149.110(湖北-荆门)	2	2	7	3	1	1	1	2	1	1	1	1	1	1	2	2	1	2	2	3	1	1	5	3	3	5	3	4	5	5	3	4	4	4	3	4	3	4	3	1	1	3	2	3
629	2025/5/17 18:11:54	265秒	微信	N/A	27.150.92.139(福建-三明)	1	2	7	2	4	2	1	1	1	1	4	2	3	3	3	2	2	4	3	2	1	1	3	3	2	1	2	2	2	2	3	5	3	5	4	4	2	5	5	4	4	5	3	5
485	2025/5/17 18:02:33	294秒	微信	N/A	111.72.198.111(江西-鹰潭)	2	1	3	2	2	1	4	1	5	1	1	2	5	2	2	4	1	3	4	5	4	2	4	5	5	4	4	5	5	4	4	5	4	3	4	4	2	5	4	4	3	2	2	1
56	2025/5/17 17:34:08	233秒	微信	N/A	118.112.195.16(四川-成都)	1	2	4	4	5	3	4	3	5	4	3	5	3	5	3	4	2	3	4	4	5	1	1	3	5	2	2	3	4	5	4	3	4	5	3	3	4	4	4	2	1	1	4	3
236	2025/5/17 17:45:46	223秒	微信	N/A	221.234.29.3(湖北-荆门)	2	2	5	4	3	4	4	3	2	4	5	5	5	4	4	4	5	2	4	4	2	3	2	1	2	4	3	5	3	1	2	4	1	2	2	1	3	1	2	1	2	2	1	2
433	2025/5/17 17:59:14	214秒	微信	N/A	58.52.153.142(湖北-咸宁)	2	2	4	4	3	4	2	2	5	2	4	2	5	4	4	5	2	4	3	4	5	5	5	5	5	2	1	3	2	1	3	2	2	1	2	2	3	1	3	5	3	2	4	1
102	2025/5/17 17:37:12	284秒	微信	N/A	111.72.194.124(江西-鹰潭)	1	2	5	2	4	2	1	1	1	2	3	2	2	1	2	3	3	1	1	3	3	1	2	1	1	4	1	1	3	1	4	1	1	5	2	2	3	2	3	3	5	3	2	2
288	2025/5/17 17:49:21	193秒	微信	N/A	180.105.129.179(江苏-连云港)	1	1	3	1	1	1	1	1	1	2	1	2	1	2	1	2	1	1	2	1	2	2	4	2	5	4	5	4	4	2	1	2	1	3	2	5	5	5	1	5	5	2	1	5
165	2025/5/17 17:41:02	253秒	微信	N/A	116.1.7.153(广西-桂林)	2	2	6	2	1	2	2	1	2	3	1	2	3	1	2	2	2	2	2	2	2	1	3	3	4	2	3	2	2	5	5	3	3	4	2	4	1	3	3	2	1	2	1	1
933	2025/5/17 18:45:45	193秒	微信	N/A	125.78.228.85(福建-莆田)	2	2	6	1	1	2	1	2	5	3	1	1	3	2	2	3	3	5	3	1	3	1	1	1	2	4	2	2	2	4	5	5	3	3	5	2	4	3	2	5	5	5	4	2
689	2025/5/17 18:17:34	223秒	微信	N/A	183.130.245.140(浙江-温州)	1	1	3	4	1	1	1	3	4	2	4	1	2	2	2	3	2	2	2	1	3	1	1	4	3	5	4	4	1	5	4	4	5	2	2	5	4	4	2	5	3	4	4	2
686	2025/5/17 18:17:16	271秒	微信	N/A	118.113.246.17(四川-成都)	1	1	1	1	4	5	4	2	1	5	3	1	2	3	1	3	4	1	2	5	2	5	3	2	2	1	2	2	2	2	3	5	4	5	5	5	3	2	4	1	1	3	1	4
57	2025/5/17 17:34:09	245秒	微信	N/A	120.43.58.172(福建-宁德)	2	2	7	2	2	1	2	1	1	1	1	2	4	5	5	5	4	5	4	2	4	2	5	3	1	1	2	5	1	2	5	4	4	4	3	4	4	5	4	2	2	2	2	2
434	2025/5/17 17:59:16	216秒	微信	N/A	118.113.244.20(四川-成都)	2	1	3	1	1	5	1	3	5	3	4	2	5	2	2	1	4	5	4	3	2	4	1	1	3	4	5	4	1	1	1	2	2	1	1	1	1	2	1	1	1	2	1	4
115	2025/5/17 17:38:00	270秒	微信	N/A	125.87.80.113(重庆-重庆)	2	2	5	4	3	4	4	5	5	3	5	3	2	2	3	3	5	5	2	2	3	3	1	3	2	4	4	4	2	2	1	1	3	2	2	1	2	2	3	2	2	1	2	2
568	2025/5/17 18:08:03	271秒	微信	N/A	111.72.194.69(江西-鹰潭)	1	2	4	1	4	3	1	1	4	5	1	3	2	4	5	2	4	4	4	5	5	5	4	5	5	5	4	3	4	2	3	2	2	2	1	1	2	1	4	2	2	2	2	4
108	2025/5/17 17:37:26	269秒	微信	N/A	117.86.153.22(江苏-南通)	1	2	4	4	4	5	3	2	4	3	5	4	5	2	2	4	5	4	5	4	3	4	3	4	3	5	4	1	2	2	1	3	3	4	4	4	1	2	2	1	1	1	2	2
11	2025/5/17 17:31:14	233秒	微信	N/A	117.86.82.86(江苏-南通)	1	1	1	5	4	5	3	5	2	5	4	4	4	3	4	5	3	4	2	4	4	2	2	4	4	3	4	4	4	2	1	4	1	4	1	4	5	3	3	2	4	2	1	1
525	2025/5/17 18:05:17	282秒	微信	N/A	121.232.81.221(江苏-南通)	2	1	1	2	2	2	1	2	2	3	3	1	2	2	4	3	1	2	1	2	2	2	1	2	2	1	1	1	2	5	5	3	5	1	3	1	2	4	1	3	4	4	3	2
160	2025/5/17 17:40:40	252秒	微信	N/A	111.72.195.57(江西-鹰潭)	1	2	5	2	1	1	3	1	1	1	4	3	2	1	2	4	2	3	4	1	3	2	2	1	2	2	1	3	2	2	1	1	1	1	1	3	2	2	1	3	5	4	3	2
913	2025/5/17 18:42:09	253秒	微信	N/A	59.60.123.243(福建-莆田)	1	2	6	3	4	4	3	2	4	1	3	4	1	3	2	1	3	5	3	5	1	4	2	3	2	2	1	1	1	1	2	2	1	1	2	2	2	1	2	5	4	5	3	5
278	2025/5/17 17:48:19	204秒	微信	N/A	125.87.88.170(重庆-重庆)	2	1	2	4	1	2	5	1	2	5	1	2	2	5	3	4	2	4	4	3	3	1	4	1	1	2	1	4	2	1	2	3	2	2	1	1	2	2	1	2	2	1	1	3
711	2025/5/17 18:19:30	248秒	微信	N/A	123.189.115.185(辽宁-鞍山)	1	1	1	4	1	3	2	5	2	3	1	2	5	3	4	3	3	4	5	5	4	4	2	1	4	2	3	5	2	3	2	1	1	1	3	1	2	1	4	5	4	5	4	1
7	2025/5/17 17:30:52	284秒	微信	N/A	125.125.233.38(浙江-湖州)	2	1	4	4	4	3	3	4	5	5	5	5	3	1	3	5	2	3	3	5	4	2	4	2	1	2	2	2	2	2	2	3	1	2	2	2	1	4	3	1	2	2	1	1
283	2025/5/17 17:48:58	259秒	微信	N/A	125.87.88.189(重庆-重庆)	2	1	2	5	3	5	3	5	4	5	2	5	3	5	3	4	5	5	4	5	2	4	3	3	2	4	1	1	4	1	1	1	2	2	1	2	2	2	2	2	1	2	2	1
272	2025/5/17 17:47:55	273秒	微信	N/A	123.189.115.123(辽宁-鞍山)	2	1	2	1	1	1	1	1	1	2	3	3	1	2	3	1	1	1	1	2	2	3	1	1	2	1	1	1	1	2	3	2	3	2	1	1	1	2	2	5	4	4	3	2
61	2025/5/17 17:34:22	306秒	微信	N/A	202.101.213.220(江西-抚州)	2	2	5	1	2	3	3	2	1	4	1	2	2	1	1	1	3	2	1	1	2	1	3	2	1	1	4	1	2	2	1	1	1	4	2	4	1	3	2	4	1	2	2	2
633	2025/5/17 18:12:10	226秒	微信	N/A	125.87.91.58(重庆-重庆)	1	2	5	2	2	2	3	2	1	1	3	2	1	2	1	2	1	1	2	1	2	4	5	2	3	2	4	2	1	1	3	2	1	2	3	2	1	4	2	1	1	2	2	4
201	2025/5/17 17:43:24	201秒	微信	N/A	59.58.104.132(福建-莆田)	2	2	5	2	3	1	1	1	2	1	3	1	2	2	1	1	3	1	2	1	1	2	4	4	4	4	4	4	3	3	2	1	3	3	3	1	2	2	1	1	2	2	2	1
736	2025/5/17 18:21:53	209秒	微信	N/A	125.87.84.237(重庆-重庆)	2	2	5	3	3	1	1	1	2	4	2	2	3	1	2	2	2	1	2	3	3	2	4	2	3	4	2	4	2	2	2	2	2	2	2	1	2	1	1	2	1	3	2	2
684	2025/5/17 18:17:14	249秒	微信	N/A	114.229.32.126(江苏-镇江)	1	2	6	3	1	4	2	1	5	2	5	2	2	2	2	1	4	1	3	5	4	2	1	2	1	1	1	2	2	1	2	1	2	3	2	2	1	1	2	1	1	3	3	2
418	2025/5/17 17:57:54	232秒	微信	N/A	120.39.142.104(福建-宁德)	2	1	2	1	3	2	4	2	1	4	1	1	2	2	2	3	2	1	2	1	3	3	1	1	1	3	2	3	1	2	1	2	1	3	2	1	2	1	2	3	5	1	5	2
4	2025/5/17 17:30:37	189秒	微信	N/A	111.72.195.188(江西-鹰潭)	1	1	2	2	3	1	2	5	1	4	1	2	2	1	1	2	2	1	1	2	2	2	3	2	2	2	4	1	1	3	2	1	1	2	1	2	2	2	1	1	1	2	2	1
228	2025/5/17 17:45:00	253秒	微信	N/A	171.83.248.4(湖北-黄冈)	2	2	4	3	1	4	2	1	5	4	4	2	2	4	1	3	3	3	1	4	4	2	2	2	1	1	1	2	1	2	2	2	1	1	2	2	1	2	3	1	2	2	2	4
116	2025/5/17 17:38:00	193秒	微信	N/A	123.189.115.35(辽宁-鞍山)	1	2	5	2	1	1	1	1	2	1	4	3	1	2	1	2	1	1	2	2	3	4	2	1	1	2	3	2	2	4	4	1	2	3	2	1	2	1	1	2	1	1	1	1
492	2025/5/17 18:03:06	265秒	微信	N/A	180.112.240.31(江苏-无锡)	1	1	3	2	4	3	1	2	2	1	2	3	2	4	2	1	3	4	1	3	1	1	3	3	1	2	2	1	2	4	3	1	1	2	1	3	3	2	2	2	5	2	4	5
19	2025/5/17 17:31:42	238秒	微信	N/A	117.26.88.93(福建-莆田)	1	1	3	1	1	2	2	3	1	2	4	3	2	5	1	3	4	3	2	1	3	2	1	3	1	4	3	1	2	1	3	4	2	3	3	3	1	1	2	5	3	4	4	1
84	2025/5/17 17:35:50	233秒	微信	N/A	49.84.88.38(江苏-镇江)	1	2	4	1	1	1	1	2	2	3	1	2	1	2	2	1	1	1	3	2	1	2	1	1	3	3	2	1	4	1	2	3	1	2	1	2	3	2	1	1	3	2	3	4
716	2025/5/17 18:20:11	263秒	微信	N/A	117.26.223.231(福建-莆田)	1	2	5	2	2	2	2	1	1	2	3	1	2	3	1	2	2	2	2	1	1	2	5	1	1	4	3	3	1	2	4	1	3	3	2	1	1	2	2	5	4	5	4	5
432	2025/5/17 17:59:07	288秒	微信	N/A	171.41.131.68(湖北-荆门)	2	1	3	4	1	3	5	1	1	4	1	2	5	5	1	1	3	3	1	5	3	1	1	3	1	1	1	1	2	3	2	1	1	5	5	4	1	3	4	2	2	2	2	3
31	2025/5/17 17:32:36	253秒	微信	N/A	171.41.149.214(湖北-荆门)	1	2	4	1	2	1	1	2	2	1	2	1	1	3	5	2	5	2	4	4	4	5	4	2	2	2	3	1	3	5	2	2	5	4	5	4	5	4	3	2	3	1	3	2
268	2025/5/17 17:47:43	200秒	微信	N/A	144.255.44.77(山东-烟台)	2	1	4	4	2	1	2	1	1	2	1	1	2	4	4	3	3	4	5	4	5	4	3	1	1	2	4	4	3	1	2	1	1	1	1	1	2	1	4	4	3	4	3	1
574	2025/5/17 18:08:29	273秒	微信	N/A	220.161.240.64(福建-宁德)	2	2	7	4	4	3	4	4	4	5	2	5	3	4	4	2	5	2	4	5	4	4	4	1	2	2	1	3	3	1	2	1	3	1	2	2	1	2	2	1	5	3	3	4
256	2025/5/17 17:47:01	213秒	微信	N/A	222.212.224.37(四川-成都)	1	1	1	4	5	4	5	3	4	4	2	3	4	4	1	2	2	5	4	5	4	2	5	1	2	5	4	2	2	1	2	4	4	1	2	2	2	1	2	1	2	4	3	1
523	2025/5/17 18:05:05	221秒	微信	N/A	125.109.32.155(浙江-温州)	1	2	5	3	1	2	2	2	2	2	4	5	3	3	1	4	2	5	4	4	3	5	4	5	5	5	5	5	5	1	5	4	1	3	5	1	2	2	2	2	2	1	2	5
634	2025/5/17 18:12:10	204秒	微信	N/A	117.65.60.80(安徽-蚌埠)	1	2	6	5	4	4	5	4	2	4	5	4	3	3	4	5	4	5	4	2	1	1	4	3	4	2	4	3	3	3	5	2	1	1	2	3	1	5	3	2	3	1	1	2
815	2025/5/17 18:29:49	187秒	微信	N/A	110.81.248.72(福建-泉州)	1	1	3	4	2	2	1	3	2	3	2	2	1	4	5	1	4	3	1	1	3	2	5	1	3	1	2	3	1	3	1	1	1	1	1	1	2	2	1	5	5	5	4	4
814	2025/5/17 18:29:37	215秒	微信	N/A	59.60.121.250(福建-莆田)	1	1	1	4	5	1	2	2	2	3	5	1	4	3	1	5	2	2	4	5	2	4	1	1	5	2	1	1	1	2	2	1	1	1	1	1	2	2	1	2	5	2	2	3
942	2025/5/17 18:47:27	205秒	微信	N/A	123.189.113.111(辽宁-鞍山)	1	1	2	4	4	3	5	4	2	5	4	4	5	2	1	1	1	1	2	2	1	2	3	1	2	3	3	4	1	1	2	2	1	1	2	2	2	2	1	4	5	4	4	5
23	2025/5/17 17:31:57	224秒	微信	N/A	221.234.30.165(湖北-荆门)	1	2	6	1	1	4	2	5	2	3	5	1	3	3	4	5	2	4	4	3	4	5	5	2	3	3	2	2	1	2	1	1	2	4	2	1	2	1	2	2	4	4	3	4
427	2025/5/17 17:58:36	272秒	微信	N/A	27.156.199.172(福建-宁德)	1	1	1	5	4	4	4	2	5	4	4	4	3	4	4	5	4	3	4	1	5	4	2	4	1	3	5	4	2	2	1	1	1	3	2	2	1	2	3	2	2	3	1	5
37	2025/5/17 17:32:57	264秒	微信	N/A	125.87.87.84(重庆-重庆)	1	2	6	5	4	5	4	4	4	2	5	2	4	4	3	5	4	4	2	4	5	4	4	4	3	3	5	3	3	1	1	3	2	2	2	1	3	2	2	1	1	2	1	1
650	2025/5/17 18:13:55	275秒	微信	N/A	125.87.95.28(重庆-重庆)	2	2	6	1	4	1	1	1	2	1	1	2	2	1	3	1	2	1	1	3	2	3	1	2	1	1	2	1	2	2	3	1	2	1	4	1	2	1	2	3	5	4	4	3
776	2025/5/17 18:25:47	261秒	微信	N/A	117.28.43.207(福建-泉州)	1	2	7	2	1	2	1	2	2	3	1	2	4	3	1	3	1	1	2	2	3	1	1	2	2	2	2	1	2	5	2	3	1	1	1	3	3	2	1	1	2	2	2	2
18	2025/5/17 17:31:35	245秒	微信	N/A	27.153.141.186(福建-莆田)	2	1	3	4	4	1	2	1	1	2	3	3	2	1	1	1	2	2	1	2	1	1	2	4	1	2	1	3	2	2	3	1	5	4	2	3	1	1	1	4	1	3	1	1
315	2025/5/17 17:50:41	201秒	微信	N/A	124.72.102.114(福建-泉州)	2	2	4	1	2	3	1	4	3	2	1	1	3	1	2	3	1	3	1	1	5	2	1	1	4	1	2	1	2	1	3	1	2	1	1	2	2	1	2	4	4	3	5	1
159	2025/5/17 17:40:37	326秒	微信	N/A	111.72.199.167(江西-鹰潭)	1	1	2	2	4	2	1	2	2	1	1	1	1	2	1	1	3	1	1	2	1	1	2	4	2	3	1	1	2	2	3	2	2	1	2	1	2	1	1	4	3	4	4	2
145	2025/5/17 17:39:40	197秒	微信	N/A	125.78.229.227(福建-莆田)	2	1	2	1	2	2	2	2	3	2	1	2	2	1	1	4	4	1	2	1	2	1	1	1	2	2	1	2	1	4	2	1	1	4	3	1	3	1	3	4	2	2	2	4
243	2025/5/17 17:46:14	256秒	微信	N/A	222.212.224.143(四川-成都)	1	2	4	2	2	1	2	1	1	2	2	3	2	2	2	2	2	1	3	2	1	1	4	1	2	2	4	2	2	3	2	3	1	3	1	4	3	1	2	3	4	3	4	4
688	2025/5/17 18:17:33	293秒	微信	N/A	111.72.195.219(江西-鹰潭)	2	2	5	2	2	1	1	1	2	5	2	3	3	1	2	2	1	3	1	2	1	1	2	2	2	3	3	2	1	2	1	2	1	2	1	1	2	1	1	2	2	1	4	4
536	2025/5/17 18:05:54	221秒	微信	N/A	111.72.197.67(江西-鹰潭)	1	2	6	4	2	2	2	1	4	2	2	2	2	1	1	4	4	1	4	3	5	2	2	1	1	4	2	2	1	2	2	1	1	1	1	1	2	2	2	5	2	2	1	5
471	2025/5/17 18:01:45	297秒	微信	N/A	140.250.146.76(山东-济南)	2	2	7	1	1	4	1	5	1	2	2	1	5	1	5	3	3	4	4	1	1	1	1	1	4	4	2	1	2	1	2	1	4	1	3	2	1	1	1	2	1	2	1	1
239	2025/5/17 17:45:54	255秒	微信	N/A	111.72.128.244(江西-宜春)	1	1	3	1	3	2	2	2	1	1	2	2	1	1	2	1	1	1	1	2	1	1	5	4	4	3	2	4	5	1	1	2	2	1	3	2	2	2	1	1	2	1	4	2
1004	2025/5/17 18:59:23	218秒	微信	N/A	125.87.81.197(重庆-重庆)	1	2	5	2	1	5	3	1	4	2	1	2	1	2	2	3	2	2	2	1	3	1	2	5	3	5	3	1	2	2	3	2	1	2	4	4	2	2	3	2	3	1	1	2
625	2025/5/17 18:11:36	187秒	微信	N/A	125.87.95.48(重庆-重庆)	1	2	7	2	1	1	1	2	2	2	1	3	1	2	2	1	2	2	3	1	2	2	1	1	1	2	1	1	2	3	1	2	1	2	1	1	1	1	2	3	3	5	4	2
235	2025/5/17 17:45:43	216秒	微信	N/A	140.250.146.135(山东-济南)	1	2	7	2	4	3	1	3	1	1	2	1	1	2	1	2	3	1	2	3	1	1	1	1	1	1	2	2	1	2	1	2	2	2	1	1	2	2	1	2	2	2	1	2
877	2025/5/17 18:37:20	274秒	微信	N/A	125.87.86.88(重庆-重庆)	1	1	3	2	1	1	2	2	2	2	4	1	1	4	2	1	1	3	3	2	3	1	1	2	1	3	1	1	3	2	3	3	2	1	3	2	2	2	2	3	2	1	2	4
743	2025/5/17 18:22:42	226秒	微信	N/A	27.153.142.3(福建-莆田)	1	1	4	3	4	1	4	1	1	1	3	2	1	4	5	2	1	1	2	1	4	3	2	2	1	1	2	3	3	2	3	1	3	4	4	1	1	1	5	5	5	4	5	3
303	2025/5/17 17:49:56	297秒	微信	N/A	121.205.221.167(福建-莆田)	1	1	1	1	2	1	3	5	1	1	1	5	3	2	1	3	3	3	3	1	5	2	1	2	5	4	1	2	1	3	3	3	1	1	4	1	4	4	4	2	1	2	1	3
803	2025/5/17 18:28:41	227秒	微信	N/A	120.42.148.180(福建-泉州)	2	2	6	1	3	4	3	4	4	2	2	2	3	3	2	1	4	1	3	5	5	1	2	1	2	1	1	2	3	1	5	4	5	2	1	5	3	1	4	1	1	4	3	3
238	2025/5/17 17:45:53	273秒	微信	N/A	125.87.94.37(重庆-重庆)	1	2	6	3	1	3	3	5	2	2	3	1	1	3	2	4	2	3	5	5	1	2	2	5	2	4	1	1	2	1	1	1	1	3	1	2	3	2	2	1	5	4	4	2
91	2025/5/17 17:36:23	219秒	微信	N/A	114.231.90.80(江苏-南通)	2	2	5	4	2	2	5	1	5	3	2	1	4	3	1	5	3	4	1	5	1	2	1	5	1	3	4	3	1	2	2	3	3	2	2	2	1	1	4	1	2	4	2	1
837	2025/5/17 18:31:50	243秒	微信	N/A	140.224.28.173(福建-泉州)	2	2	4	3	3	1	3	3	4	4	1	1	1	2	2	1	4	5	3	1	5	2	5	5	5	5	4	4	4	3	2	3	1	2	2	4	2	2	1	4	5	5	4	3
46	2025/5/17 17:33:37	212秒	微信	N/A	118.112.194.183(四川-成都)	1	2	6	1	4	3	3	3	2	2	5	4	4	2	5	2	3	4	5	4	4	5	1	3	4	2	1	5	3	2	1	1	1	2	2	1	1	2	2	4	3	5	3	1
203	2025/5/17 17:43:31	295秒	微信	N/A	117.90.223.11(江苏-镇江)	2	1	1	5	4	3	4	4	4	2	2	2	5	4	2	4	5	4	2	5	5	5	1	1	5	2	4	5	4	2	2	1	1	1	3	2	3	1	1	4	5	4	2	3
527	2025/5/17 18:05:26	297秒	微信	N/A	117.90.156.64(江苏-镇江)	1	1	1	4	2	3	4	5	5	4	5	4	4	2	5	5	4	5	4	4	4	4	3	1	1	4	5	3	2	2	1	1	2	3	2	1	2	1	3	2	1	2	2	5
745	2025/5/17 18:23:05	227秒	微信	N/A	125.87.86.211(重庆-重庆)	1	1	3	1	3	1	3	1	4	4	1	3	2	2	3	5	2	3	4	1	1	2	1	1	3	2	2	1	2	2	2	1	1	1	3	2	1	3	2	2	1	3	3	2
322	2025/5/17 17:51:17	257秒	微信	N/A	180.105.129.151(江苏-连云港)	2	1	2	1	2	1	1	4	2	2	1	1	1	4	4	4	4	5	4	3	2	5	1	4	5	1	1	1	4	2	2	1	1	2	2	2	2	1	4	4	4	4	3	1
329	2025/5/17 17:51:37	234秒	微信	N/A	111.72.196.253(江西-鹰潭)	1	1	1	5	4	5	2	4	4	3	4	3	3	3	2	1	5	1	4	1	5	3	2	1	1	2	4	4	5	1	2	2	1	2	3	2	2	2	3	1	2	1	2	3
806	2025/5/17 18:29:05	269秒	微信	N/A	220.161.240.213(福建-宁德)	2	2	4	5	4	5	2	3	4	3	5	4	5	4	2	4	2	5	3	4	3	3	4	5	3	4	1	3	4	3	1	2	1	2	2	4	2	2	2	1	2	1	4	4
124	2025/5/17 17:38:32	259秒	微信	N/A	59.54.238.21(江西-抚州)	1	2	7	3	4	2	2	3	2	4	5	5	5	4	3	5	5	5	2	4	4	5	5	3	3	2	5	5	2	2	1	1	2	4	3	2	2	2	2	1	2	1	1	3
802	2025/5/17 18:28:39	300秒	微信	N/A	183.130.157.92(浙江-温州)	2	1	3	1	1	1	1	1	1	2	1	2	1	3	1	2	1	1	3	1	1	2	2	2	2	4	3	1	2	5	2	2	2	1	3	1	2	2	3	2	2	1	5	5
254	2025/5/17 17:46:51	212秒	微信	N/A	222.212.224.15(四川-成都)	2	2	5	3	1	2	2	3	2	2	1	2	1	2	2	3	1	1	2	3	3	1	1	1	4	2	2	2	2	2	5	1	3	2	1	4	5	1	2	2	1	1	3	3
273	2025/5/17 17:48:00	231秒	微信	N/A	123.189.115.164(辽宁-鞍山)	1	1	2	2	3	2	1	1	2	3	5	2	2	2	2	1	1	1	1	1	3	2	4	1	1	1	2	4	2	3	2	1	2	5	5	1	2	4	4	1	2	2	1	1
133	2025/5/17 17:39:00	289秒	微信	N/A	125.87.82.249(重庆-重庆)	1	1	4	1	4	1	2	4	3	2	1	2	1	2	2	3	1	3	2	4	1	2	4	1	2	3	1	2	1	3	5	4	3	5	5	4	2	2	4	2	3	2	3	5
458	2025/5/17 18:01:00	242秒	微信	N/A	111.72.133.84(江西-宜春)	2	2	7	2	2	2	2	1	2	2	3	1	1	5	3	5	5	4	4	2	4	5	2	3	1	2	4	3	4	1	4	2	2	2	1	2	1	2	2	1	2	3	2	4
753	2025/5/17 18:23:55	292秒	微信	N/A	59.60.210.54(福建-三明)	1	2	4	2	4	4	5	4	4	4	4	3	5	4	5	5	3	2	4	4	4	4	3	2	2	4	1	2	2	1	3	2	2	4	4	1	3	2	3	2	2	1	1	4
827	2025/5/17 18:30:50	254秒	微信	N/A	218.86.66.31(福建-宁德)	1	1	2	1	1	1	2	1	2	2	3	2	1	2	1	2	3	2	1	1	2	2	2	2	1	1	1	1	1	1	1	2	1	2	2	5	5	4	4	3	1	5	2	2
484	2025/5/17 18:02:32	256秒	微信	N/A	180.114.98.54(江苏-无锡)	1	2	6	1	2	4	2	1	2	1	2	2	1	2	4	5	1	1	1	1	1	2	2	2	1	2	1	1	1	4	4	4	4	3	3	2	3	5	1	2	1	4	2	1
751	2025/5/17 18:23:36	279秒	微信	N/A	124.72.101.113(福建-泉州)	2	1	2	3	2	3	1	2	2	1	2	1	1	2	4	1	2	2	2	2	2	1	1	2	1	1	1	4	1	2	4	1	4	5	3	3	3	5	3	2	1	3	2	3
628	2025/5/17 18:11:47	237秒	微信	N/A	27.158.125.168(福建-三明)	1	1	3	1	1	4	1	2	4	1	2	3	2	3	2	3	4	1	3	2	1	2	2	3	3	1	1	3	2	5	5	2	4	4	5	1	3	4	3	4	5	5	5	4
350	2025/5/17 17:52:55	260秒	微信	N/A	125.87.80.64(重庆-重庆)	1	1	2	1	1	3	4	1	5	1	5	4	2	1	2	2	5	4	3	3	3	2	2	1	4	1	2	2	1	2	2	1	1	2	2	2	1	1	1	2	4	5	3	5
818	2025/5/17 18:30:07	223秒	微信	N/A	118.113.246.169(四川-成都)	1	2	5	5	5	4	5	4	3	5	3	3	3	1	4	1	1	2	1	1	1	2	2	2	1	4	3	4	1	3	1	1	3	2	1	5	1	1	1	1	1	5	5	4
657	2025/5/17 18:14:51	218秒	微信	N/A	117.24.176.108(福建-泉州)	2	2	6	5	3	3	3	3	1	1	2	1	4	3	3	2	4	1	3	1	2	1	4	4	5	5	4	4	2	2	2	2	2	2	2	2	2	2	1	4	1	1	1	5
865	2025/5/17 18:35:34	268秒	微信	N/A	114.232.204.94(江苏-南通)	2	1	4	4	3	4	5	4	4	5	4	3	3	1	1	1	2	1	3	1	1	2	4	4	4	4	4	3	5	3	2	3	4	1	3	1	5	2	1	3	1	2	4	5
504	2025/5/17 18:03:50	188秒	微信	N/A	27.157.131.51(福建-三明)	2	2	7	4	4	4	4	2	5	5	3	4	4	4	3	2	4	1	3	4	4	5	2	5	2	4	5	2	1	4	4	5	2	4	2	4	5	4	2	3	5	1	1	1
712	2025/5/17 18:19:31	260秒	微信	N/A	123.189.114.67(辽宁-鞍山)	1	1	2	2	1	1	4	4	2	3	3	2	3	5	4	5	4	4	4	4	4	4	5	4	5	4	4	4	4	1	2	2	1	2	1	1	2	1	1	3	3	2	3	4
155	2025/5/17 17:40:27	262秒	微信	N/A	218.87.205.50(江西-抚州)	2	2	6	2	4	2	1	4	1	2	2	1	1	2	2	3	2	1	2	2	1	4	3	1	1	1	2	2	1	1	2	1	3	1	2	1	2	1	2	3	5	4	4	1
567	2025/5/17 18:07:59	268秒	微信	N/A	183.130.211.100(浙江-温州)	2	1	4	3	2	1	1	2	2	2	1	1	2	3	1	2	2	1	1	2	2	1	1	1	2	1	4	5	4	1	1	1	2	1	2	2	3	2	2	2	1	2	1	2
403	2025/5/17 17:56:22	190秒	微信	N/A	114.232.204.120(江苏-南通)	2	2	7	2	1	1	2	2	2	2	3	3	3	1	2	1	4	2	1	2	1	2	3	1	2	5	2	2	5	1	1	1	3	1	2	2	4	3	2	3	2	2	4	3
381	2025/5/17 17:54:47	194秒	微信	N/A	110.90.175.252(福建-宁德)	2	2	5	5	5	2	3	1	5	3	3	2	2	3	4	4	1	3	3	1	5	5	3	2	1	2	1	1	4	2	4	1	1	2	1	3	4	1	5	1	1	1	1	1
660	2025/5/17 18:15:02	300秒	微信	N/A	125.87.81.25(重庆-重庆)	2	1	2	3	3	1	3	2	3	2	3	1	5	1	5	2	3	3	3	3	5	2	5	4	5	5	4	5	4	1	5	1	2	4	1	4	2	5	1	2	5	5	3	4
977	2025/5/17 18:54:21	243秒	微信	N/A	140.237.31.134(福建-莆田)	2	2	5	5	3	4	4	4	3	4	4	5	4	2	4	5	2	3	3	5	2	4	3	5	2	1	4	2	3	4	3	4	5	4	2	4	5	4	5	5	3	4	4	1
407	2025/5/17 17:56:41	266秒	微信	N/A	183.142.105.95(浙江-湖州)	2	2	4	1	1	3	2	1	1	1	1	1	2	1	2	2	2	2	2	1	2	1	5	3	2	1	3	2	2	4	4	5	5	4	5	2	3	4	5	1	1	1	4	2
337	2025/5/17 17:52:02	293秒	微信	N/A	125.125.235.98(浙江-湖州)	1	2	7	2	1	4	3	1	2	2	2	3	2	3	3	1	2	1	2	5	2	2	1	1	2	2	3	3	1	1	5	1	3	3	1	3	4	5	1	2	2	1	1	2
477	2025/5/17 18:02:07	207秒	微信	N/A	171.83.248.3(湖北-黄冈)	2	2	6	3	4	4	4	3	4	5	4	4	5	5	3	3	4	5	4	3	5	4	1	2	4	2	2	4	2	1	4	2	4	3	5	3	5	1	2	1	1	2	1	1
811	2025/5/17 18:29:34	387秒	微信	N/A	125.87.85.175(重庆-重庆)	2	2	6	4	4	3	4	4	4	5	5	3	3	3	5	5	5	3	3	4	4	4	2	4	4	2	4	5	3	5	2	5	4	5	3	5	2	4	2	3	4	4	2	2
285	2025/5/17 17:49:05	270秒	微信	N/A	118.113.244.204(四川-成都)	2	2	7	5	4	3	5	5	4	5	5	5	4	4	5	4	4	5	4	4	4	4	4	5	5	3	5	4	4	5	5	3	5	2	4	3	4	5	3	1	1	1	4	3
826	2025/5/17 18:30:49	259秒	微信	N/A	117.28.43.234(福建-泉州)	2	1	4	1	1	1	2	3	5	2	5	2	4	3	5	2	5	1	5	1	1	2	2	4	2	1	5	2	1	2	4	4	5	5	5	4	2	4	5	3	2	4	5	3
740	2025/5/17 18:22:17	277秒	微信	N/A	111.72.134.124(江西-宜春)	2	1	2	3	4	5	1	1	4	1	4	5	2	3	5	4	2	1	4	2	5	1	2	1	3	2	3	3	5	5	4	4	4	5	5	4	4	3	4	2	2	1	2	5
64	2025/5/17 17:34:39	224秒	微信	N/A	111.72.199.174(江西-鹰潭)	2	2	5	4	3	4	4	3	4	5	5	4	5	5	3	4	5	5	4	4	5	2	2	5	3	4	2	2	2	4	5	3	4	5	4	4	5	5	3	1	2	3	1	2
127	2025/5/17 17:38:42	286秒	微信	N/A	61.130.200.34(浙江-湖州)	1	2	4	4	3	4	5	5	3	4	4	4	5	5	5	4	3	4	3	5	4	5	5	4	4	4	4	4	5	5	4	5	5	4	5	5	4	3	5	3	5	3	5	2
49	2025/5/17 17:33:46	300秒	微信	N/A	144.255.40.89(山东-烟台)	2	1	4	5	4	5	5	4	4	2	4	3	5	4	5	3	4	5	5	3	5	5	5	5	4	3	4	5	4	4	5	5	5	5	4	5	5	5	4	4	2	5	4	4
690	2025/5/17 18:17:39	240秒	微信	N/A	171.41.129.171(湖北-荆门)	1	1	2	3	5	5	4	4	5	4	4	4	4	4	4	5	5	4	4	4	5	4	3	4	4	5	5	5	5	4	3	5	5	1	2	3	2	2	3	2	1	2	2	3
805	2025/5/17 18:28:57	260秒	微信	N/A	183.130.152.111(浙江-温州)	1	1	3	5	5	3	3	5	5	3	4	4	5	4	4	5	5	4	4	5	5	4	5	5	4	5	4	5	4	4	3	3	1	5	5	2	3	2	3	2	2	2	2	2
755	2025/5/17 18:24:09	284秒	微信	N/A	183.130.197.55(浙江-温州)	1	2	7	5	4	5	4	4	4	2	4	3	4	5	3	4	2	3	4	4	5	1	1	1	3	3	3	2	2	4	5	4	4	4	3	2	4	4	5	4	3	4	4	2
902	2025/5/17 18:40:38	245秒	微信	N/A	183.143.249.106(浙江-湖州)	1	1	4	4	4	5	3	4	5	4	5	3	3	5	5	1	4	4	1	4	1	4	4	2	4	2	3	3	1	5	5	4	5	3	3	5	4	2	4	5	5	5	5	1
24	2025/5/17 17:32:06	297秒	微信	N/A	49.76.132.206(江苏-无锡)	1	2	6	3	4	3	3	5	4	2	3	4	4	5	5	4	3	4	4	3	3	4	3	1	1	5	4	4	1	4	5	4	4	4	5	4	3	3	5	2	2	1	2	5
277	2025/5/17 17:48:18	181秒	微信	N/A	117.86.65.61(江苏-南通)	2	1	2	4	5	5	4	4	2	4	4	5	4	4	4	5	4	5	5	5	5	2	2	4	2	3	4	4	4	4	3	5	5	5	4	3	4	4	4	4	2	4	4	4
338	2025/5/17 17:52:10	273秒	微信	N/A	49.76.134.30(江苏-无锡)	2	2	5	5	4	4	3	4	5	5	4	4	4	5	2	4	4	4	4	3	5	5	4	4	3	4	4	4	3	4	5	5	5	4	5	4	4	4	4	4	4	2	4	1
300	2025/5/17 17:49:52	258秒	微信	N/A	140.250.147.189(山东-济南)	1	2	6	4	4	3	4	5	4	4	4	5	5	3	4	5	4	5	4	5	4	4	4	2	5	4	4	5	5	5	5	4	5	4	5	4	5	4	5	2	1	2	1	1
436	2025/5/17 17:59:30	191秒	微信	N/A	180.105.234.235(江苏-连云港)	2	2	7	2	1	1	2	1	2	3	2	1	2	1	2	3	3	1	2	2	1	1	2	2	1	1	1	4	1	5	4	5	5	5	5	5	4	5	4	4	1	4	2	1
53	2025/5/17 17:33:56	294秒	微信	N/A	123.189.112.61(辽宁-鞍山)	1	1	1	1	2	1	1	2	2	3	1	1	1	2	2	2	2	1	2	1	1	2	1	1	5	2	2	4	3	4	4	5	5	5	5	5	4	5	5	1	3	2	2	1
479	2025/5/17 18:02:15	227秒	微信	N/A	180.105.234.244(江苏-连云港)	1	2	6	1	3	2	1	1	2	2	1	3	5	3	1	4	2	3	2	2	2	1	2	2	1	1	2	2	2	2	4	3	2	3	4	1	1	4	2	1	2	1	4	2
406	2025/5/17 17:56:41	264秒	微信	N/A	125.78.227.7(福建-莆田)	2	2	6	1	1	2	2	1	2	2	1	3	2	4	2	1	1	3	4	5	1	2	2	2	2	2	1	3	2	3	3	4	5	3	2	1	4	1	1	2	1	2	2	4
321	2025/5/17 17:51:07	279秒	微信	N/A	183.130.245.69(浙江-温州)	1	2	6	1	3	2	1	3	1	2	2	3	2	2	2	2	4	1	3	1	4	4	1	1	1	2	5	3	1	4	3	2	1	4	5	3	1	1	3	1	3	5	2	3
66	2025/5/17 17:34:47	204秒	微信	N/A	59.60.210.83(福建-三明)	2	2	4	2	2	1	3	1	2	2	2	3	3	4	1	4	2	2	2	2	1	4	2	2	1	4	1	4	1	1	1	1	1	1	1	1	2	1	2	3	5	1	1	5
426	2025/5/17 17:58:31	383秒	微信	N/A	49.76.132.210(江苏-无锡)	1	2	5	1	2	4	2	2	2	1	1	2	1	3	2	1	1	4	1	1	5	2	2	1	1	2	2	3	1	1	2	1	1	2	2	1	1	1	1	2	1	1	2	5
304	2025/5/17 17:50:00	296秒	微信	N/A	116.22.31.194(广东-广州)	2	1	2	1	1	2	2	4	2	2	2	1	1	1	3	2	2	1	2	2	2	1	3	3	3	2	2	1	3	2	3	1	1	1	2	2	1	3	1	1	3	1	1	4
316	2025/5/17 17:50:56	280秒	微信	N/A	125.87.85.210(重庆-重庆)	1	2	5	2	2	2	2	2	1	1	2	3	3	1	2	2	2	2	2	1	1	4	2	4	1	1	1	2	1	2	2	4	2	1	1	2	1	2	1	1	2	3	1	4
932	2025/5/17 18:45:36	298秒	微信	N/A	125.87.83.219(重庆-重庆)	1	1	3	1	3	1	1	2	1	3	2	4	1	1	3	4	2	3	3	1	3	1	1	1	3	2	1	1	3	2	2	3	1	2	1	2	1	4	1	3	3	5	4	1
685	2025/5/17 18:17:14	223秒	微信	N/A	118.113.244.94(四川-成都)	1	1	3	3	2	3	2	2	1	2	2	2	2	1	2	4	2	2	2	2	3	5	4	2	1	1	2	1	3	1	2	2	2	2	1	4	2	1	2	5	5	2	3	3
503	2025/5/17 18:03:48	251秒	微信	N/A	171.41.129.51(湖北-荆门)	2	1	2	2	4	2	3	1	1	2	3	5	2	3	2	2	5	5	3	1	1	1	1	1	1	3	2	5	4	4	1	2	2	2	1	1	2	2	2	4	4	3	3	1
864	2025/5/17 18:35:28	255秒	微信	N/A	125.87.92.170(重庆-重庆)	1	2	7	2	2	2	1	2	2	1	1	1	2	3	3	1	2	1	2	1	1	2	1	1	1	2	2	2	1	2	2	2	2	2	1	2	3	3	4	5	5	3	4	4
513	2025/5/17 18:04:28	216秒	微信	N/A	114.229.58.244(江苏-镇江)	2	1	3	4	2	2	4	2	1	2	2	1	2	1	2	3	3	2	2	2	2	3	3	2	2	1	2	2	1	1	4	3	2	2	3	1	4	2	3	3	3	1	3	5
59	2025/5/17 17:34:19	248秒	微信	N/A	202.101.213.211(江西-抚州)	1	1	4	1	3	2	1	2	2	3	2	2	2	2	1	2	1	3	2	3	2	1	2	1	2	1	1	4	1	1	2	1	1	2	2	2	1	2	1	2	2	1	2	3
60	2025/5/17 17:34:21	201秒	微信	N/A	111.179.79.180(湖北-咸宁)	2	2	4	5	1	3	1	3	3	4	3	2	2	2	4	1	2	4	1	4	1	4	1	1	1	1	1	2	1	2	1	2	2	1	2	2	2	1	2	1	2	2	3	1
511	2025/5/17 18:04:12	201秒	微信	N/A	111.179.75.225(湖北-咸宁)	1	2	5	1	5	1	1	5	2	2	3	3	3	3	4	5	3	1	3	2	3	1	2	1	1	1	2	4	2	2	3	2	1	1	2	2	2	2	2	3	2	1	2	1
260	2025/5/17 17:47:18	215秒	微信	N/A	111.179.107.92(湖北-咸宁)	2	2	6	4	1	1	5	3	2	2	5	3	2	3	4	3	5	4	3	4	3	5	1	1	2	4	4	2	4	2	2	2	4	1	3	3	2	1	1	1	1	4	1	1
526	2025/5/17 18:05:19	237秒	微信	N/A	114.232.2.28(江苏-南通)	1	2	7	4	2	4	4	4	4	3	3	5	4	3	4	4	3	5	2	4	1	5	2	2	1	2	2	2	4	2	1	2	1	1	2	2	5	5	1	1	1	2	3	3
77	2025/5/17 17:35:21	272秒	微信	N/A	111.72.193.124(江西-鹰潭)	2	2	4	1	2	2	1	2	2	1	2	1	1	2	1	1	1	2	2	1	2	4	3	1	1	1	1	1	2	1	5	2	1	1	3	2	5	2	1	2	4	3	3	1
12	2025/5/17 17:31:14	187秒	微信	N/A	114.232.86.119(江苏-南通)	1	1	1	1	3	1	1	5	1	2	1	3	4	4	1	1	1	3	2	4	4	2	1	1	2	2	3	1	1	2	1	1	1	1	2	1	2	2	1	4	1	3	1	4
457	2025/5/17 18:00:46	280秒	微信	N/A	144.255.40.196(山东-烟台)	1	1	3	4	5	3	1	1	4	1	1	1	2	3	4	5	1	2	4	4	1	2	1	1	2	1	1	5	2	2	1	2	2	2	2	2	2	1	1	3	2	2	2	3
506	2025/5/17 18:03:58	210秒	微信	N/A	125.87.83.172(重庆-重庆)	1	1	4	4	4	3	5	5	5	4	5	4	2	1	2	2	2	1	1	2	2	2	1	2	1	1	2	1	1	1	2	2	1	2	3	2	2	1	2	3	3	3	5	1
540	2025/5/17 18:06:11	248秒	微信	N/A	183.130.135.230(浙江-温州)	1	1	2	4	1	4	5	1	1	2	4	1	4	1	4	1	3	1	4	3	3	5	2	2	2	2	2	1	2	3	1	3	4	1	1	3	2	1	2	4	4	1	2	5
476	2025/5/17 18:02:03	269秒	微信	N/A	221.228.177.59(江苏-无锡)	1	1	1	3	3	5	2	3	4	5	4	4	5	2	1	1	1	1	2	1	2	2	3	4	5	4	4	4	3	3	5	1	2	1	3	1	1	3	2	1	1	1	3	1
199	2025/5/17 17:43:18	268秒	微信	N/A	121.205.222.207(福建-莆田)	2	1	2	1	3	2	3	1	2	2	5	3	2	2	4	3	3	1	3	1	3	5	5	4	5	5	4	5	3	1	2	2	2	1	2	2	3	3	2	1	1	1	2	1
274	2025/5/17 17:48:08	284秒	微信	N/A	220.190.49.118(浙江-温州)	1	2	5	4	3	4	4	3	5	3	5	3	5	4	5	4	4	2	2	4	4	5	3	2	2	2	4	2	1	1	2	2	5	1	3	1	4	2	2	5	3	3	1	5
566	2025/5/17 18:07:53	201秒	微信	N/A	27.158.126.17(福建-三明)	1	2	7	1	5	3	4	3	2	1	3	2	2	5	3	3	3	3	1	3	2	1	2	1	2	1	2	3	2	2	1	2	1	1	1	1	2	1	2	1	3	2	2	5
603	2025/5/17 18:10:01	240秒	微信	N/A	121.206.143.51(福建-三明)	2	2	4	4	1	1	3	4	3	1	4	1	1	1	2	1	1	5	3	2	3	2	4	5	2	4	4	4	4	1	3	1	2	2	4	2	1	2	1	5	2	5	4	5
879	2025/5/17 18:37:39	277秒	微信	N/A	117.28.43.36(福建-泉州)	2	2	4	2	4	2	3	1	4	2	3	3	2	5	3	4	4	4	2	4	3	2	1	1	2	3	3	3	4	1	1	4	1	2	1	3	3	5	2	3	2	3	5	5
45	2025/5/17 17:33:34	230秒	微信	N/A	125.87.85.197(重庆-重庆)	2	1	2	2	3	1	3	5	1	2	4	5	2	4	5	4	4	5	5	5	5	3	5	2	5	4	5	4	5	2	2	1	5	2	3	2	1	5	1	1	1	1	1	5
213	2025/5/17 17:44:06	285秒	微信	N/A	180.121.147.194(江苏-南通)	1	2	5	1	1	3	1	1	3	1	3	1	2	1	1	2	1	1	1	3	1	1	2	2	4	1	2	2	2	3	3	1	5	1	3	2	1	5	1	5	4	3	5	2
706	2025/5/17 18:19:11	243秒	微信	N/A	183.130.235.179(浙江-温州)	1	2	5	1	1	2	3	2	2	2	1	1	1	2	2	3	1	2	1	1	1	2	4	1	3	1	2	4	1	3	5	2	1	1	5	1	5	1	5	2	2	2	2	5
344	2025/5/17 17:52:31	295秒	微信	N/A	125.87.93.156(重庆-重庆)	1	2	4	1	3	2	4	2	1	1	1	4	3	1	2	2	2	1	4	5	3	2	1	1	4	1	2	2	4	5	3	3	5	3	4	2	4	5	4	1	1	1	1	5
112	2025/5/17 17:37:49	202秒	微信	N/A	140.250.145.146(山东-济南)	2	1	2	3	3	1	2	3	2	4	1	1	3	3	1	3	2	2	2	2	2	5	1	1	4	3	3	2	1	4	4	5	5	2	4	4	3	5	4	2	1	3	1	2
113	2025/5/17 17:37:55	238秒	微信	N/A	123.189.115.231(辽宁-鞍山)	2	1	2	2	2	5	2	2	3	1	4	4	2	4	3	4	4	3	4	5	3	4	1	3	3	2	2	3	4	1	1	3	1	1	1	2	2	1	1	5	5	3	2	1
866	2025/5/17 18:35:40	233秒	微信	N/A	121.205.220.197(福建-莆田)	2	2	4	4	5	4	2	3	5	4	3	5	5	3	5	4	2	4	5	3	4	4	5	3	2	4	1	5	4	2	2	2	1	1	2	2	1	4	2	5	2	4	3	2
134	2025/5/17 17:39:00	183秒	微信	N/A	125.87.95.162(重庆-重庆)	1	1	1	3	1	3	5	3	2	4	4	2	3	5	4	4	5	5	4	5	3	5	5	4	4	5	5	3	5	2	4	2	2	4	2	2	1	2	2	2	3	5	2	2
271	2025/5/17 17:47:53	291秒	微信	N/A	125.87.80.249(重庆-重庆)	1	2	7	1	2	4	2	2	2	2	1	1	1	1	3	1	1	2	2	3	2	1	1	1	2	2	1	1	1	1	2	2	1	3	1	3	3	5	2	1	4	2	1	4
804	2025/5/17 18:28:46	253秒	微信	N/A	183.130.141.44(浙江-温州)	1	1	3	1	1	4	2	3	3	2	1	1	2	1	3	2	4	2	2	2	3	1	1	2	1	2	2	1	2	2	2	2	2	3	3	2	2	2	3	1	1	1	2	3
502	2025/5/17 18:03:43	277秒	微信	N/A	121.205.230.212(福建-莆田)	2	1	3	2	4	2	2	2	2	2	3	1	1	1	2	1	2	2	2	3	2	1	3	5	2	4	1	2	3	1	5	3	3	2	1	3	2	3	1	2	2	1	2	4
354	2025/5/17 17:53:13	184秒	微信	N/A	118.113.247.62(四川-成都)	2	2	6	2	4	4	1	3	2	3	4	1	2	3	3	2	3	5	1	2	4	2	3	2	5	3	1	3	1	2	5	2	1	2	2	2	3	4	2	2	1	2	2	2
488	2025/5/17 18:02:49	282秒	微信	N/A	125.87.85.160(重庆-重庆)	1	1	3	1	3	3	2	1	4	4	4	1	5	1	5	4	4	4	4	2	1	1	4	4	5	5	4	5	4	3	2	4	1	2	1	1	5	4	4	4	4	2	5	2
1008	2025/5/17 19:00:18	237秒	微信	N/A	180.105.53.122(江苏-连云港)	1	1	2	2	1	1	1	2	1	1	1	2	1	3	2	1	4	1	1	1	1	1	2	4	4	1	1	3	1	5	3	4	2	4	4	3	4	4	5	2	1	2	2	2
744	2025/5/17 18:22:57	188秒	微信	N/A	27.157.129.183(福建-三明)	1	2	6	1	3	1	3	2	3	2	2	1	1	4	1	2	2	1	3	3	4	1	2	2	2	1	1	3	1	2	2	3	1	1	1	2	1	2	2	5	4	5	4	2
449	2025/5/17 18:00:24	219秒	微信	N/A	121.207.144.59(福建-厦门)	2	2	6	2	1	1	2	3	1	3	2	4	1	3	1	5	1	4	2	2	4	1	1	1	1	2	2	4	2	3	4	2	2	1	2	2	2	2	1	1	1	3	1	2
404	2025/5/17 17:56:26	236秒	微信	N/A	125.87.83.64(重庆-重庆)	1	2	5	2	3	2	2	2	1	1	5	1	5	5	1	2	3	2	4	3	1	3	4	3	5	5	4	5	4	2	5	2	2	2	2	4	1	4	3	5	4	3	4	2
301	2025/5/17 17:49:56	296秒	微信	N/A	222.35.227.56(北京-北京)	2	2	6	3	3	1	1	4	4	2	2	4	4	4	5	4	4	4	5	5	5	4	4	4	4	3	5	5	5	4	2	2	4	1	3	4	2	3	3	2	3	2	2	1
741	2025/5/17 18:22:19	204秒	微信	N/A	221.233.233.194(湖北-咸宁)	1	2	6	1	1	5	2	3	3	4	4	3	2	5	4	5	5	5	4	4	5	5	5	5	5	4	5	4	4	5	5	4	2	3	4	4	4	4	3	1	2	2	2	1
217	2025/5/17 17:44:20	280秒	微信	N/A	111.72.195.74(江西-鹰潭)	1	2	7	5	5	4	4	4	5	4	2	4	4	5	5	5	5	4	5	4	5	3	2	5	4	5	4	5	4	4	3	4	4	5	4	5	4	3	4	5	5	1	1	1
416	2025/5/17 17:57:43	202秒	微信	N/A	121.205.213.74(福建-莆田)	1	2	5	5	4	5	5	3	4	4	4	5	4	5	5	5	4	5	4	5	4	3	5	2	4	5	3	5	4	2	1	1	2	1	2	1	1	2	2	5	4	3	3	1
48	2025/5/17 17:33:42	252秒	微信	N/A	144.255.40.82(山东-烟台)	2	1	2	4	5	4	5	4	4	4	5	4	2	4	4	5	5	4	4	5	5	4	5	4	5	5	5	3	4	4	2	1	2	1	2	3	2	2	2	1	2	3	4	4
748	2025/5/17 18:23:25	268秒	微信	N/A	125.87.85.26(重庆-重庆)	1	1	3	1	2	2	1	1	2	3	2	2	1	4	4	4	4	4	4	4	4	4	1	3	3	5	1	3	2	4	3	4	5	3	5	5	2	4	3	4	1	2	1	5
76	2025/5/17 17:35:18	258秒	微信	N/A	125.109.52.110(浙江-温州)	1	2	5	1	4	5	3	2	4	1	1	5	4	5	1	3	3	4	4	2	3	1	3	4	2	3	2	2	2	1	4	1	3	1	3	1	4	4	5	1	1	1	4	4
38	2025/5/17 17:33:06	264秒	微信	N/A	125.87.84.166(重庆-重庆)	1	2	6	4	5	4	3	4	4	2	3	1	3	5	3	4	4	3	5	5	4	3	5	3	5	2	3	3	3	2	2	1	4	2	5	3	3	2	3	1	1	3	2	1
154	2025/5/17 17:40:23	190秒	微信	N/A	183.130.151.62(浙江-温州)	1	1	2	5	5	3	2	2	4	4	5	4	4	5	4	4	5	4	5	4	2	3	1	3	5	2	2	3	4	4	3	3	2	2	4	2	2	2	3	2	3	1	4	1
473	2025/5/17 18:01:52	298秒	微信	N/A	120.35.201.138(福建-三明)	1	1	3	5	5	5	5	4	3	5	3	5	5	3	2	4	4	4	1	2	2	2	4	5	5	5	4	4	4	2	1	4	1	1	3	2	2	1	1	4	1	1	4	1
871	2025/5/17 18:36:34	251秒	微信	N/A	125.109.52.127(浙江-温州)	1	2	5	2	2	4	5	1	2	2	5	1	4	4	5	5	5	5	4	4	5	4	5	5	4	5	4	5	4	1	3	2	2	2	2	1	1	1	3	4	5	4	5	2
907	2025/5/17 18:41:25	300秒	微信	N/A	125.87.85.74(重庆-重庆)	1	2	7	3	3	4	4	5	5	5	4	4	4	3	3	4	5	5	5	4	3	4	4	4	5	2	4	5	2	2	2	2	1	1	2	4	3	1	2	1	1	3	1	3
442	2025/5/17 17:59:51	209秒	微信	N/A	125.123.186.168(浙江-嘉兴)	2	2	5	3	4	5	5	4	3	4	5	4	5	5	4	4	5	5	3	4	4	4	4	5	4	4	5	4	5	4	1	1	1	4	5	2	1	1	1	1	2	1	1	4
702	2025/5/17 18:18:49	191秒	微信	N/A	110.81.248.143(福建-泉州)	1	1	1	4	4	4	3	5	5	4	4	5	4	5	5	4	4	5	5	5	4	4	5	5	5	4	5	4	4	2	4	5	1	4	2	3	1	2	4	1	1	1	1	4
565	2025/5/17 18:07:52	243秒	微信	N/A	123.189.112.173(辽宁-鞍山)	1	2	4	4	3	4	3	5	4	4	2	4	4	4	1	2	5	4	3	5	2	4	2	4	1	3	2	2	1	3	4	3	1	2	2	5	5	2	3	2	4	2	1	4
572	2025/5/17 18:08:14	234秒	微信	N/A	125.87.87.145(重庆-重庆)	2	2	5	4	2	5	4	4	3	4	4	5	3	3	4	4	4	4	2	3	4	2	2	1	3	5	1	2	1	3	5	5	4	4	2	5	3	5	4	2	3	2	2	2
89	2025/5/17 17:36:08	268秒	微信	N/A	180.105.53.68(江苏-连云港)	2	2	5	1	1	1	3	5	3	2	4	2	2	4	4	5	3	2	5	5	5	5	5	5	4	5	3	3	5	5	5	5	5	2	2	4	4	4	5	2	1	3	1	2
486	2025/5/17 18:02:35	239秒	微信	N/A	218.66.247.92(福建-宁德)	1	2	5	5	1	2	4	1	2	3	4	4	1	4	5	4	5	5	4	4	4	4	4	5	4	5	3	5	4	5	3	2	4	4	4	5	5	5	5	5	5	1	2	3
258	2025/5/17 17:47:07	224秒	微信	N/A	49.76.49.194(江苏-无锡)	2	1	3	5	2	5	5	5	2	4	5	4	3	5	4	4	4	4	4	2	4	4	4	2	4	4	3	5	4	4	4	4	4	5	5	4	5	5	4	4	4	3	5	2
2	2025/5/17 17:30:19	198秒	微信	N/A	27.24.183.136(湖北-咸宁)	1	1	1	4	5	5	3	3	5	4	3	5	5	3	4	4	2	4	4	4	5	5	3	3	3	4	5	5	4	3	5	5	5	4	5	5	5	4	4	2	2	1	1	2
439	2025/5/17 17:59:42	288秒	微信	N/A	27.150.192.51(福建-莆田)	2	2	6	5	4	4	4	4	5	4	4	5	5	5	5	5	4	5	2	4	4	4	3	5	5	4	5	3	5	4	5	5	5	5	4	5	5	4	4	2	3	5	2	2
834	2025/5/17 18:31:30	260秒	微信	N/A	125.87.86.173(重庆-重庆)	2	1	2	2	5	4	5	5	5	4	5	5	4	5	4	5	3	5	5	4	5	4	4	4	5	4	5	4	5	5	5	5	5	4	4	5	5	5	5	1	2	5	2	5
405	2025/5/17 17:56:35	199秒	微信	N/A	106.111.232.98(江苏-镇江)	2	2	7	4	3	2	3	2	1	2	1	2	4	3	1	4	4	5	4	2	5	1	4	1	1	1	2	3	2	3	5	4	4	5	4	5	2	5	3	4	5	5	5	2
570	2025/5/17 18:08:08	264秒	微信	N/A	183.130.235.149(浙江-温州)	2	2	4	2	4	1	1	2	2	1	1	2	2	3	2	2	1	1	2	3	1	2	2	3	2	1	1	1	3	3	4	4	5	5	2	4	5	4	5	1	2	1	2	1
175	2025/5/17 17:41:41	221秒	微信	N/A	140.250.147.62(山东-济南)	1	2	5	2	2	2	3	3	1	1	2	3	1	2	1	2	2	2	2	2	1	4	2	1	2	1	2	2	1	4	4	4	3	5	5	4	4	5	4	3	5	5	3	2
505	2025/5/17 18:03:55	297秒	微信	N/A	111.72.198.93(江西-鹰潭)	2	2	5	2	1	2	2	2	2	3	2	3	1	2	1	2	2	1	2	3	2	3	1	1	2	1	2	3	2	4	4	4	5	4	5	5	4	4	4	4	1	3	4	2
128	2025/5/17 17:38:42	247秒	微信	N/A	27.152.220.10(福建-泉州)	2	1	4	2	2	2	4	2	3	2	3	1	2	2	1	3	5	3	3	1	3	1	1	1	2	1	4	2	4	5	4	5	3	4	5	4	5	4	4	2	2	1	1	5
169	2025/5/17 17:41:19	300秒	微信	N/A	106.110.186.23(江苏-连云港)	1	1	1	1	2	2	2	2	2	2	1	2	2	1	1	1	3	3	3	2	1	3	2	1	2	2	1	2	1	1	4	5	4	1	1	2	4	2	2	4	4	2	3	4
364	2025/5/17 17:53:39	256秒	微信	N/A	140.250.149.158(山东-济南)	1	1	4	1	4	5	2	2	2	3	4	2	2	5	2	4	3	2	2	3	1	1	2	1	2	1	1	1	1	1	4	3	1	3	3	5	1	3	2	1	2	1	4	2
480	2025/5/17 18:02:19	220秒	微信	N/A	115.230.134.176(浙江-嘉兴)	1	1	2	2	1	2	2	1	4	3	1	2	3	1	1	2	1	1	2	2	1	2	2	2	1	2	1	4	2	2	1	4	2	4	5	4	1	3	3	1	2	2	1	2
380	2025/5/17 17:54:43	237秒	微信	N/A	118.113.244.12(四川-成都)	1	1	4	3	1	2	3	3	1	1	4	1	4	1	1	1	1	3	2	1	2	1	2	1	1	2	4	3	3	5	4	4	2	3	4	5	2	5	5	4	4	2	5	4
197	2025/5/17 17:43:09	243秒	微信	N/A	118.122.108.200(四川-成都)	2	2	4	3	1	1	4	1	1	1	1	5	1	1	3	3	2	5	4	1	2	1	1	1	1	1	4	2	3	5	5	4	5	5	5	4	3	4	4	1	1	1	2	1
8	2025/5/17 17:30:54	221秒	微信	N/A	183.130.245.249(浙江-温州)	1	1	2	4	1	2	3	2	4	1	1	2	1	3	2	3	2	1	3	2	3	2	4	1	2	3	2	1	1	4	4	5	5	4	4	5	4	5	5	5	1	3	1	2
80	2025/5/17 17:35:37	277秒	微信	N/A	59.58.148.206(福建-莆田)	2	1	1	2	3	1	2	2	1	1	1	2	2	3	2	1	1	3	2	2	1	1	2	2	1	2	3	1	1	4	5	5	3	5	5	4	5	5	4	1	1	2	2	2
214	2025/5/17 17:44:08	185秒	微信	N/A	183.130.143.206(浙江-温州)	1	1	2	2	2	2	2	2	2	1	2	2	2	3	4	4	1	1	1	1	3	1	2	1	1	2	2	2	1	3	1	2	1	4	2	2	2	1	2	1	2	2	1	4
242	2025/5/17 17:46:13	224秒	微信	N/A	222.189.106.28(江苏-连云港)	1	1	1	3	2	3	1	2	2	1	1	3	1	2	2	2	1	1	1	4	3	3	3	2	2	3	1	1	2	1	2	1	1	2	4	2	1	2	1	1	5	5	5	2
74	2025/5/17 17:35:16	243秒	微信	N/A	49.70.172.23(江苏-镇江)	2	1	3	2	4	4	1	1	2	3	4	1	1	4	1	4	1	3	2	2	1	3	2	3	1	2	1	1	4	2	1	2	2	1	2	2	2	1	3	1	5	1	1	3
697	2025/5/17 18:18:25	250秒	微信	N/A	115.239.63.194(浙江-嘉兴)	2	1	4	2	1	3	3	1	2	2	3	1	5	2	2	4	3	5	2	1	3	1	2	2	2	2	1	3	4	3	1	3	2	2	2	1	2	1	2	1	2	2	1	5
939	2025/5/17 18:46:51	244秒	微信	N/A	121.206.142.27(福建-三明)	1	1	1	5	2	4	4	5	3	4	4	4	5	2	2	1	2	1	2	2	1	2	2	1	1	1	1	1	2	1	2	1	1	3	1	1	2	1	2	1	2	3	1	1
461	2025/5/17 18:01:06	293秒	微信	N/A	183.130.194.132(浙江-温州)	1	2	4	4	1	3	3	1	1	3	1	3	4	2	2	1	4	3	2	4	3	5	3	4	5	1	1	2	1	3	2	5	2	4	3	2	1	1	3	1	2	5	3	5
109	2025/5/17 17:37:38	263秒	微信	N/A	117.26.89.63(福建-莆田)	2	1	1	1	5	4	1	4	1	4	2	5	2	3	2	4	2	3	3	3	3	2	3	2	2	1	4	4	1	3	2	4	3	3	2	1	2	2	3	3	1	1	3	1
341	2025/5/17 17:52:14	240秒	微信	N/A	180.120.0.196(江苏-南通)	1	2	4	1	3	4	3	1	4	2	5	2	1	4	4	4	4	2	4	5	4	3	1	5	4	3	2	1	2	1	2	5	3	5	1	2	2	1	3	2	2	1	2	2
695	2025/5/17 18:18:09	245秒	微信	N/A	118.113.246.63(四川-成都)	2	1	3	1	1	5	1	4	1	3	5	2	5	3	5	4	5	3	5	4	3	3	5	3	5	1	2	1	1	3	3	1	3	4	1	5	1	1	3	2	4	1	3	4
575	2025/5/17 18:08:29	240秒	微信	N/A	125.87.84.75(重庆-重庆)	1	1	4	4	4	5	4	4	2	3	5	3	3	3	5	1	5	2	2	5	3	1	3	4	1	4	2	4	1	4	5	2	3	1	1	4	3	1	2	3	3	5	2	1
843	2025/5/17 18:32:39	210秒	微信	N/A	125.87.85.28(重庆-重庆)	1	2	7	4	4	4	3	4	3	4	4	5	4	3	5	5	2	3	5	4	4	3	1	2	3	1	2	3	3	4	4	3	2	4	2	2	2	1	2	2	5	2	2	2
443	2025/5/17 17:59:53	300秒	微信	N/A	59.54.238.63(江西-抚州)	1	1	1	2	4	4	2	2	2	1	4	2	3	4	3	5	5	5	3	5	5	4	4	5	5	4	4	5	4	3	4	5	3	4	4	4	4	5	4	1	2	1	1	1
10	2025/5/17 17:31:11	298秒	微信	N/A	117.26.231.178(福建-莆田)	1	1	2	1	3	2	3	2	1	1	1	2	1	3	1	1	1	3	1	1	3	3	2	1	2	2	1	2	3	4	5	4	4	3	4	4	4	4	5	3	1	3	1	2
828	2025/5/17 18:30:55	256秒	微信	N/A	120.35.202.68(福建-三明)	2	2	4	2	1	2	2	2	1	1	1	2	3	2	3	1	2	1	2	1	2	1	1	5	3	2	3	3	1	1	2	2	2	1	1	1	2	1	2	2	2	2	1	4
627	2025/5/17 18:11:41	236秒	微信	N/A	125.87.89.22(重庆-重庆)	1	2	6	4	3	4	5	3	4	3	5	5	3	4	4	4	3	5	5	3	5	3	4	3	3	5	2	2	4	1	4	1	2	1	2	1	2	1	2	1	4	1	4	4
782	2025/5/17 18:26:16	270秒	微信	N/A	111.179.76.110(湖北-咸宁)	1	1	2	2	1	1	2	1	1	3	1	3	2	1	1	2	2	1	2	2	1	4	2	3	1	2	2	3	3	2	2	3	3	4	1	1	1	2	2	3	2	3	5	2
356	2025/5/17 17:53:16	269秒	微信	N/A	125.78.228.212(福建-莆田)	2	1	4	1	1	1	2	1	2	2	2	1	1	1	2	1	2	1	4	3	2	5	1	2	4	3	1	1	2	3	1	2	1	4	2	2	2	1	3	5	2	4	4	4
637	2025/5/17 18:12:31	237秒	微信	N/A	122.230.63.89(浙江-湖州)	1	2	5	4	4	4	4	3	5	3	5	5	4	5	5	2	5	4	3	1	5	1	3	3	3	4	3	5	4	1	3	1	4	2	1	3	3	2	2	1	1	3	2	2
111	2025/5/17 17:37:47	211秒	微信	N/A	59.59.215.32(福建-三明)	1	1	3	2	3	1	1	4	1	1	2	1	2	4	4	3	1	1	1	1	1	2	1	2	2	1	1	3	1	1	5	2	3	4	1	1	4	3	2	1	1	1	3	2
696	2025/5/17 18:18:17	303秒	微信	N/A	114.231.90.72(江苏-南通)	2	1	2	3	1	1	1	1	1	4	2	3	2	2	2	3	1	1	4	1	1	1	5	4	4	2	4	4	5	1	4	2	4	3	3	4	3	1	2	2	1	4	2	5
973	2025/5/17 18:53:28	298秒	微信	N/A	114.231.89.212(江苏-南通)	1	2	5	4	1	1	3	1	1	2	4	3	3	3	3	3	1	1	3	1	2	3	3	4	4	2	4	5	5	5	4	4	3	4	5	5	4	3	3	1	2	4	4	1
123	2025/5/17 17:38:30	232秒	微信	N/A	220.190.49.69(浙江-温州)	2	1	4	4	5	5	5	4	5	3	5	5	4	1	1	4	5	3	1	5	2	1	4	4	4	5	4	5	5	2	1	2	1	1	1	1	1	3	2	3	3	1	2	1
36	2025/5/17 17:32:57	267秒	微信	N/A	125.87.88.107(重庆-重庆)	1	1	1	2	1	1	2	2	2	3	3	1	5	2	2	3	2	2	4	2	2	1	2	1	2	2	2	1	3	3	1	2	2	2	1	2	2	1	2	5	2	1	2	5
487	2025/5/17 18:02:42	270秒	微信	N/A	117.28.41.83(福建-泉州)	2	2	4	1	2	3	1	1	4	2	5	2	2	4	3	3	2	1	4	2	1	2	1	3	3	1	2	3	1	1	3	3	5	2	2	3	3	2	2	3	2	4	4	2
95	2025/5/17 17:36:43	297秒	微信	N/A	110.166.210.165(青海-黄南)	1	2	7	4	3	2	1	1	4	4	1	1	3	1	2	5	4	2	2	4	3	1	2	1	1	1	4	1	2	2	2	4	3	2	2	2	4	3	3	4	5	4	3	1
190	2025/5/17 17:42:43	246秒	微信	N/A	220.161.243.243(福建-宁德)	1	2	7	4	3	2	1	4	1	3	4	1	4	1	5	4	1	4	1	5	4	1	4	1	3	1	1	1	3	1	5	1	5	2	3	1	4	4	4	2	1	2	2	2
286	2025/5/17 17:49:05	311秒	微信	N/A	125.125.235.252(浙江-湖州)	1	1	1	4	3	4	3	4	5	5	4	5	4	3	4	3	5	5	3	5	4	2	4	3	4	4	4	3	4	5	5	4	2	3	5	5	2	4	4	5	1	1	1	2
135	2025/5/17 17:39:00	300秒	微信	N/A	125.87.93.74(重庆-重庆)	1	2	4	4	5	5	4	4	5	4	4	5	5	4	5	4	3	5	3	4	5	5	5	5	4	4	3	4	5	3	2	1	1	1	1	2	3	2	2	2	3	5	1	3
482	2025/5/17 18:02:21	211秒	微信	N/A	111.72.196.29(江西-鹰潭)	1	1	3	3	5	3	1	5	1	1	2	1	2	1	2	2	1	3	2	5	3	2	4	4	2	4	4	4	5	1	4	1	1	2	3	1	3	2	2	4	4	5	4	2
813	2025/5/17 18:29:37	280秒	微信	N/A	125.87.82.17(重庆-重庆)	1	2	7	4	4	5	4	2	4	4	4	4	4	2	1	1	2	1	1	2	2	2	4	4	3	5	3	5	4	1	1	1	1	2	1	5	3	5	2	5	3	1	4	5
21	2025/5/17 17:31:55	243秒	微信	N/A	111.72.198.85(江西-鹰潭)	2	1	4	4	3	5	5	4	4	5	5	5	2	4	5	2	4	3	4	5	4	5	4	4	3	4	5	4	4	1	4	1	5	2	1	5	1	2	2	3	2	3	1	1
58	2025/5/17 17:34:17	258秒	微信	N/A	111.72.193.103(江西-鹰潭)	2	1	3	5	3	4	4	5	5	5	4	4	4	5	5	5	4	5	4	4	3	4	3	5	4	5	4	5	4	1	1	2	2	1	4	5	4	5	1	3	2	1	1	5
32	2025/5/17 17:32:39	187秒	微信	N/A	144.255.40.177(山东-烟台)	1	2	5	3	4	5	5	4	4	5	5	4	5	4	5	4	5	4	4	5	4	5	4	4	4	4	4	4	5	2	2	1	1	2	1	2	4	1	1	3	2	2	2	3
141	2025/5/17 17:39:26	235秒	微信	N/A	114.231.88.54(江苏-南通)	2	1	2	4	4	5	5	4	4	4	4	5	5	2	5	5	5	5	5	5	4	4	5	5	4	5	5	5	2	4	4	1	1	2	1	4	1	4	3	2	1	4	1	5
742	2025/5/17 18:22:28	237秒	微信	N/A	171.41.151.226(湖北-荆门)	2	2	5	3	4	3	5	5	4	4	4	4	5	5	4	5	5	4	4	3	4	4	4	4	4	5	5	4	4	1	4	3	1	1	1	3	3	3	5	1	2	2	1	2
414	2025/5/17 17:57:31	284秒	微信	N/A	114.232.2.187(江苏-南通)	1	2	5	2	1	2	1	2	2	2	1	2	1	1	2	1	1	2	1	3	2	1	1	2	1	2	2	2	1	2	4	1	4	4	1	3	5	1	2	2	5	1	1	3
415	2025/5/17 17:57:41	274秒	微信	N/A	125.125.192.17(浙江-湖州)	2	1	2	1	2	1	1	2	2	2	2	2	1	2	2	2	2	2	2	2	2	1	2	1	1	1	2	2	1	2	4	3	2	1	3	1	4	3	4	5	4	3	5	2
756	2025/5/17 18:24:10	281秒	微信	N/A	125.87.94.44(重庆-重庆)	1	1	2	1	1	1	1	4	1	4	4	2	1	2	1	1	1	3	1	2	2	3	1	3	1	4	5	5	1	4	3	4	5	1	2	4	3	1	3	1	2	5	2	2
196	2025/5/17 17:43:05	261秒	微信	N/A	120.40.215.102(福建-三明)	1	2	6	4	1	2	2	2	1	1	2	2	2	1	4	1	1	1	3	2	2	2	1	1	1	2	2	1	2	4	4	1	1	4	3	4	3	5	2	4	1	1	3	5
168	2025/5/17 17:41:16	295秒	微信	N/A	117.42.94.155(江西-抚州)	1	1	2	1	1	2	2	2	1	2	2	1	3	2	1	2	1	1	4	3	1	2	1	1	1	1	2	1	1	2	2	5	5	3	3	4	5	3	2	2	4	4	4	1
384	2025/5/17 17:54:54	293秒	微信	N/A	27.156.211.21(福建-宁德)	1	1	2	2	1	2	2	1	3	2	3	1	2	3	2	1	1	1	4	3	2	2	4	2	2	1	2	1	1	4	4	5	5	5	3	4	4	4	2	1	1	2	3	3
122	2025/5/17 17:38:28	247秒	微信	N/A	125.87.82.32(重庆-重庆)	2	2	5	1	1	1	2	2	2	2	2	2	1	1	1	2	2	3	1	1	2	4	3	1	1	1	2	1	2	1	1	1	2	2	2	2	2	1	1	2	1	3	2	2
295	2025/5/17 17:49:29	190秒	微信	N/A	180.120.13.71(江苏-南通)	2	2	5	1	1	2	4	1	2	2	2	3	2	5	2	1	1	2	3	1	3	1	1	4	3	1	1	2	2	2	2	2	2	2	2	5	2	1	1	3	1	5	4	4
345	2025/5/17 17:52:31	216秒	微信	N/A	222.184.183.228(江苏-南通)	1	2	4	2	2	3	2	2	2	2	1	1	2	1	4	1	2	1	4	3	3	2	3	1	1	2	2	3	1	1	4	3	1	4	2	2	2	1	3	2	5	4	5	1
187	2025/5/17 17:42:32	194秒	微信	N/A	114.229.32.68(江苏-镇江)	1	1	2	2	2	2	2	1	1	3	1	1	2	1	1	2	1	2	1	2	4	3	1	1	2	2	2	3	1	1	5	5	2	1	3	3	5	1	2	5	4	4	4	1
302	2025/5/17 17:49:56	282秒	微信	N/A	110.185.218.38(四川-成都)	2	2	6	2	2	2	2	1	3	1	1	1	4	5	2	3	3	1	1	1	4	2	1	2	2	3	2	1	2	4	5	3	4	4	3	4	4	5	4	5	4	5	4	4
276	2025/5/17 17:48:11	191秒	微信	N/A	111.72.194.121(江西-鹰潭)	1	1	2	3	3	4	1	3	2	1	4	2	1	3	2	2	2	5	2	2	1	1	1	1	1	4	1	3	2	4	5	4	5	3	3	4	5	5	4	5	3	4	5	2
194	2025/5/17 17:42:55	234秒	微信	N/A	110.166.208.235(青海-海东)	2	2	7	2	1	5	1	2	1	2	2	3	4	2	2	5	4	1	3	1	3	1	5	4	3	1	1	1	1	5	5	4	4	4	4	4	5	3	5	1	1	1	2	2
29	2025/5/17 17:32:21	289秒	微信	N/A	114.231.59.199(江苏-南通)	2	2	4	4	1	3	1	3	3	3	1	2	4	4	5	5	4	5	3	5	4	3	5	4	5	3	4	4	5	5	5	4	5	5	3	5	4	4	4	3	3	4	5	2
362	2025/5/17 17:53:32	267秒	微信	N/A	27.156.195.7(福建-宁德)	1	2	5	4	5	3	4	2	4	3	4	4	4	4	3	5	3	3	2	4	5	2	4	5	4	5	5	5	5	5	2	5	5	4	4	5	5	5	4	1	3	5	1	4
340	2025/5/17 17:52:13	235秒	微信	N/A	111.72.194.76(江西-鹰潭)	1	2	7	1	2	1	2	2	1	2	3	2	4	2	2	3	1	3	3	1	2	1	2	1	1	2	1	1	1	1	4	1	5	4	3	5	4	1	1	2	2	2	4	3
747	2025/5/17 18:23:11	221秒	微信	N/A	49.79.133.188(江苏-南通)	1	1	1	2	4	2	2	1	1	2	2	1	2	1	4	4	2	2	1	1	1	2	1	1	3	1	2	1	2	4	3	5	4	4	4	4	5	5	2	2	3	3	1	5
265	2025/5/17 17:47:30	274秒	微信	N/A	117.90.218.247(江苏-镇江)	1	1	4	4	1	1	2	3	1	1	4	2	1	1	3	2	2	5	1	1	5	2	1	1	1	2	2	3	3	5	5	5	2	4	4	3	5	5	3	5	2	1	2	2
438	2025/5/17 17:59:35	226秒	微信	N/A	123.189.115.34(辽宁-鞍山)	2	1	4	4	1	1	3	1	2	4	3	2	1	2	3	1	3	1	2	3	2	2	4	3	1	2	5	5	2	4	4	5	4	3	5	5	5	4	3	4	3	4	5	1
515	2025/5/17 18:04:28	293秒	微信	N/A	180.127.139.212(江苏-连云港)	2	2	6	3	1	1	1	2	5	3	1	2	5	3	2	3	2	4	1	5	3	5	5	2	1	1	5	1	2	4	4	4	5	5	5	4	3	5	3	1	2	1	2	2
97	2025/5/17 17:36:55	220秒	微信	N/A	180.114.125.48(江苏-无锡)	1	1	3	2	2	3	5	1	1	2	3	2	3	5	4	5	5	4	4	5	5	4	5	4	5	4	4	5	4	5	4	5	4	3	5	5	4	5	5	2	2	1	2	5
264	2025/5/17 17:47:28	242秒	微信	N/A	117.86.203.106(江苏-南通)	1	2	5	3	1	2	1	1	1	2	2	2	2	2	2	2	1	2	3	2	2	1	1	1	2	1	1	1	4	2	2	3	3	2	3	1	2	4	5	4	1	1	1	2
290	2025/5/17 17:49:23	261秒	微信	N/A	111.72.196.118(江西-鹰潭)	1	2	6	2	1	2	4	2	2	1	1	1	2	1	2	2	3	2	1	2	3	2	1	2	1	1	3	2	3	1	4	2	1	4	4	5	1	4	2	4	2	1	2	5
626	2025/5/17 18:11:38	234秒	微信	N/A	125.87.94.12(重庆-重庆)	1	2	5	2	1	4	1	1	1	1	3	2	4	2	4	2	3	3	2	1	1	1	4	1	1	2	1	1	1	3	2	3	2	5	4	4	3	1	2	2	2	2	3	2
105	2025/5/17 17:37:23	190秒	微信	N/A	111.179.76.200(湖北-咸宁)	1	1	1	2	3	2	2	1	4	2	3	1	1	2	1	1	3	2	2	3	1	3	1	1	1	3	3	2	1	1	4	3	5	3	2	5	5	1	2	1	2	2	2	2
541	2025/5/17 18:06:14	214秒	微信	N/A	27.24.181.78(湖北-咸宁)	1	1	1	3	2	3	1	2	1	3	1	2	1	1	2	4	1	1	3	2	5	2	4	2	1	2	2	1	1	4	3	5	4	4	4	3	4	3	5	3	4	4	4	4
420	2025/5/17 17:58:04	265秒	微信	N/A	183.141.43.174(浙江-嘉兴)	1	1	2	2	3	1	2	2	2	1	3	2	3	1	5	2	1	1	1	4	3	2	1	3	2	1	3	2	2	3	4	5	3	4	4	4	4	5	4	3	2	2	1	1
279	2025/5/17 17:48:29	184秒	微信	N/A	183.130.139.80(浙江-温州)	2	2	5	3	2	2	1	1	2	1	1	1	1	1	2	2	2	1	1	2	3	2	4	4	2	5	3	5	5	4	5	4	4	5	5	3	4	2	4	2	2	1	2	4
844	2025/5/17 18:32:41	255秒	微信	N/A	220.161.240.60(福建-宁德)	1	1	3	2	1	1	2	1	1	2	2	1	1	4	4	5	2	4	3	4	4	2	2	2	2	1	3	4	2	2	2	2	1	2	2	1	1	2	2	1	5	1	5	3
291	2025/5/17 17:49:23	216秒	微信	N/A	125.125.140.180(浙江-湖州)	1	1	4	3	4	2	5	5	4	4	5	3	4	1	2	4	5	3	4	1	3	2	1	1	1	3	5	4	2	1	2	1	3	2	2	3	1	1	2	2	2	2	1	4
255	2025/5/17 17:46:53	215秒	微信	N/A	222.212.224.39(四川-成都)	1	1	3	2	5	4	5	4	3	4	4	2	5	4	4	5	3	5	2	4	4	2	4	1	2	1	3	1	3	1	1	1	2	1	2	3	4	2	2	1	1	1	2	2
944	2025/5/17 18:47:56	238秒	微信	N/A	110.88.28.61(福建-三明)	1	1	3	5	3	2	2	2	2	2	1	5	2	4	4	5	5	4	5	4	5	5	5	5	4	5	5	4	4	2	5	3	1	3	1	1	1	1	2	5	2	4	5	5
943	2025/5/17 18:47:49	187秒	微信	N/A	117.24.176.168(福建-泉州)	1	2	5	1	2	3	2	1	3	2	2	2	1	2	3	1	1	1	1	1	1	2	3	2	2	3	4	2	3	3	1	2	3	1	1	3	4	3	3	4	5	4	4	1
428	2025/5/17 17:58:43	263秒	微信	N/A	120.33.5.254(福建-泉州)	2	1	2	1	1	2	4	1	2	2	2	2	2	3	1	2	1	3	3	4	1	1	1	4	2	2	1	2	2	2	2	1	1	4	5	1	4	2	3	5	4	4	5	2
413	2025/5/17 17:57:22	248秒	微信	N/A	220.190.50.99(浙江-温州)	1	2	7	1	1	5	1	3	2	1	1	5	1	3	2	2	2	2	2	4	2	1	1	1	1	2	1	3	2	1	1	4	1	1	5	4	1	5	2	5	4	3	3	2
293	2025/5/17 17:49:27	252秒	微信	N/A	111.72.130.84(江西-宜春)	2	2	7	4	1	3	2	3	1	1	2	2	4	1	2	4	2	1	1	1	1	2	3	2	2	4	1	2	2	4	2	2	2	1	2	2	1	3	2	1	3	2	2	3
79	2025/5/17 17:35:23	276秒	微信	N/A	125.87.92.122(重庆-重庆)	2	1	2	1	1	2	1	1	1	2	2	5	3	2	1	1	1	1	2	4	3	1	5	4	4	3	3	5	4	2	1	1	1	1	2	2	2	1	1	1	2	4	2	3
339	2025/5/17 17:52:12	221秒	微信	N/A	183.130.132.91(浙江-温州)	1	1	1	1	4	2	2	1	4	1	5	2	2	1	1	1	2	2	2	4	3	2	4	4	4	5	2	2	4	1	1	2	2	1	2	1	2	2	1	3	3	1	2	3
370	2025/5/17 17:54:09	193秒	微信	N/A	183.141.172.98(浙江-嘉兴)	1	1	2	1	1	5	1	4	2	3	4	3	5	4	2	1	3	2	3	4	4	1	2	1	3	2	4	4	1	1	3	2	2	2	2	2	2	2	2	1	3	2	3	4
498	2025/5/17 18:03:24	188秒	微信	N/A	117.90.216.10(江苏-镇江)	1	1	1	1	1	2	1	1	2	4	1	1	2	1	2	2	1	2	4	1	3	1	5	3	3	5	5	3	4	1	2	5	3	5	1	2	2	1	3	1	5	3	2	5
514	2025/5/17 18:04:28	294秒	微信	N/A	114.229.58.217(江苏-镇江)	1	1	4	3	5	2	4	2	2	5	1	2	4	1	5	4	5	1	2	1	5	5	2	2	1	1	3	1	4	1	4	3	1	3	1	2	3	1	1	5	1	2	1	2
275	2025/5/17 17:48:10	295秒	微信	N/A	125.109.62.23(浙江-温州)	1	2	5	2	1	5	3	1	2	4	4	1	3	2	3	3	1	5	3	2	1	2	4	5	3	4	4	4	4	1	2	3	2	4	3	4	1	3	2	4	4	4	4	1
582	2025/5/17 18:08:53	196秒	微信	N/A	111.72.197.196(江西-鹰潭)	1	2	5	2	1	1	1	2	1	1	4	1	2	2	1	1	2	1	2	2	4	1	1	1	1	1	1	1	1	1	1	1	2	1	1	2	1	3	1	3	2	3	2	3
202	2025/5/17 17:43:28	224秒	微信	N/A	59.58.49.71(福建-宁德)	1	2	6	1	2	3	2	1	2	2	1	1	2	2	1	2	2	2	2	1	2	2	2	2	1	2	4	1	1	1	4	4	1	3	3	1	2	2	3	3	1	1	1	3
110	2025/5/17 17:37:41	222秒	微信	N/A	110.89.120.2(福建-三明)	2	2	5	1	3	4	2	3	1	2	3	1	2	2	3	4	1	1	2	3	2	2	1	2	3	2	2	1	3	1	3	1	1	2	4	5	5	1	1	3	2	5	2	1
25	2025/5/17 17:32:07	274秒	微信	N/A	180.112.43.221(江苏-无锡)	1	1	2	4	5	4	5	5	5	4	4	5	4	5	5	5	5	4	5	4	5	4	3	5	5	5	5	4	5	5	3	3	2	2	2	3	2	2	1	5	1	4	3	4
311	2025/5/17 17:50:31	289秒	微信	N/A	123.189.114.38(辽宁-鞍山)	1	1	1	2	5	3	3	1	3	2	4	2	4	3	2	3	2	2	5	5	3	2	4	4	3	2	2	1	2	4	2	3	3	4	3	5	4	5	3	5	3	5	2	4
73	2025/5/17 17:35:11	209秒	微信	N/A	117.26.88.233(福建-莆田)	2	2	7	3	4	5	4	5	3	3	5	3	4	3	5	5	4	5	2	5	1	2	2	2	2	2	2	2	3	2	2	2	2	1	2	1	1	2	1	4	2	1	2	1
437	2025/5/17 17:59:32	184秒	微信	N/A	114.229.60.15(江苏-镇江)	2	1	1	4	3	5	5	5	5	5	5	4	4	3	2	2	3	2	3	3	3	3	4	4	4	5	5	4	5	1	3	2	3	2	2	1	2	2	1	1	3	1	2	1
94	2025/5/17 17:36:36	294秒	微信	N/A	111.72.194.141(江西-鹰潭)	2	2	5	3	3	4	3	4	2	4	4	3	2	2	3	1	3	2	5	4	1	2	1	2	1	1	2	3	1	2	2	1	1	5	1	1	4	1	3	2	4	1	1	1
287	2025/5/17 17:49:11	276秒	微信	N/A	125.87.83.248(重庆-重庆)	1	2	4	2	2	2	3	2	1	4	2	3	2	2	2	2	2	3	2	3	1	3	4	3	3	3	5	3	5	1	2	3	4	2	4	1	5	5	3	1	2	4	1	2
754	2025/5/17 18:24:00	279秒	微信	N/A	222.210.164.109(四川-成都)	2	1	3	1	4	1	3	4	4	2	1	4	2	1	3	2	3	5	1	5	2	3	4	4	5	4	5	5	4	1	2	1	5	2	3	1	3	5	1	1	2	3	4	2
636	2025/5/17 18:12:27	208秒	微信	N/A	120.43.32.179(福建-宁德)	1	1	4	4	5	4	4	4	4	4	2	5	3	3	4	4	3	4	4	4	2	4	2	1	3	2	1	3	3	1	4	3	1	4	1	5	1	4	1	3	2	1	2	5
450	2025/5/17 18:00:30	191秒	微信	N/A	114.231.59.214(江苏-南通)	1	2	6	5	4	3	5	3	4	4	2	4	4	2	4	4	5	3	3	1	4	3	4	4	1	3	4	1	3	1	2	2	4	3	3	5	2	5	1	2	3	2	1	4
269	2025/5/17 17:47:46	241秒	微信	N/A	110.87.251.35(福建-三明)	1	2	6	2	4	3	5	4	5	4	4	4	5	4	4	3	4	5	5	4	3	4	4	4	4	3	5	3	3	1	1	4	4	4	2	1	3	4	5	1	2	2	2	3
121	2025/5/17 17:38:19	206秒	微信	N/A	58.52.167.197(湖北-咸宁)	2	2	6	4	5	5	5	4	2	5	5	5	3	4	4	3	5	3	5	4	5	4	5	5	4	4	4	4	4	2	4	5	5	5	2	4	4	2	4	1	2	1	1	2
371	2025/5/17 17:54:11	207秒	微信	N/A	118.113.244.152(四川-成都)	2	1	2	2	1	3	4	4	2	5	2	1	2	1	3	2	1	4	3	3	3	4	5	2	1	2	2	4	1	1	2	2	1	2	2	2	1	1	2	3	4	5	1	2
100	2025/5/17 17:37:09	295秒	微信	N/A	111.72.129.56(江西-宜春)	2	2	6	1	2	5	5	2	1	2	3	2	3	1	3	4	5	2	2	1	3	1	4	4	4	5	3	4	4	2	1	1	1	1	1	2	3	1	4	2	2	2	2	1
17	2025/5/17 17:31:35	183秒	微信	N/A	218.87.205.97(江西-抚州)	2	1	1	5	2	5	3	3	4	5	5	5	3	1	1	1	1	1	2	3	2	2	3	4	5	3	5	3	4	3	3	2	1	3	2	3	1	2	3	2	1	2	2	4
39	2025/5/17 17:33:06	296秒	微信	N/A	118.112.195.55(四川-成都)	2	1	3	5	3	4	5	2	2	4	2	4	5	3	4	4	4	3	4	3	1	2	4	2	3	4	1	2	4	1	5	1	5	1	3	2	4	2	3	1	5	4	1	1
497	2025/5/17 18:03:19	283秒	微信	N/A	183.130.151.86(浙江-温州)	1	2	7	2	1	2	1	1	1	1	3	1	1	1	2	3	1	1	1	3	1	1	1	1	5	1	3	3	1	3	4	5	4	3	4	4	5	5	4	1	2	5	1	2
379	2025/5/17 17:54:42	221秒	微信	N/A	140.224.30.170(福建-泉州)	1	2	5	1	1	1	1	4	1	2	4	1	1	2	1	2	2	2	1	1	1	1	1	2	1	2	1	4	4	1	1	1	3	1	2	2	2	2	2	1	2	2	1	2
103	2025/5/17 17:37:13	235秒	微信	N/A	111.72.129.49(江西-宜春)	1	2	5	2	1	1	3	2	1	1	3	2	2	2	2	1	3	3	2	2	2	1	1	2	3	2	1	1	1	2	3	1	2	1	3	1	1	2	2	1	1	2	1	5
638	2025/5/17 18:12:40	259秒	微信	N/A	140.224.31.24(福建-泉州)	2	2	6	2	1	1	1	2	2	2	4	1	3	4	2	3	1	1	3	3	3	1	1	2	1	1	4	1	2	2	2	1	1	1	1	3	1	4	2	5	4	4	5	1
781	2025/5/17 18:26:13	185秒	微信	N/A	180.127.139.237(江苏-连云港)	2	1	1	4	1	3	3	1	1	3	5	1	2	1	3	5	1	3	3	3	5	4	2	2	4	2	2	1	1	2	2	1	3	2	1	3	1	1	3	5	5	3	4	4
270	2025/5/17 17:47:51	218秒	微信	N/A	27.156.215.109(福建-宁德)	2	2	6	2	2	1	2	1	1	1	2	2	2	1	2	1	3	2	4	1	1	2	2	1	1	4	1	2	1	3	1	3	5	2	1	5	2	2	4	2	4	4	4	4
353	2025/5/17 17:53:07	231秒	微信	N/A	117.26.220.132(福建-莆田)	1	2	6	2	2	1	2	1	3	2	2	2	1	3	1	4	1	2	2	2	1	1	1	2	1	3	3	2	1	5	4	5	2	4	2	4	1	4	1	1	1	3	3	2
335	2025/5/17 17:51:54	200秒	微信	N/A	118.113.246.133(四川-成都)	1	2	4	3	1	2	3	3	1	3	3	1	3	2	5	4	2	1	2	1	1	3	2	2	2	2	3	2	1	1	5	5	5	4	3	2	2	4	2	1	3	1	1	1
139	2025/5/17 17:39:14	235秒	微信	N/A	27.153.141.208(福建-莆田)	1	1	3	2	1	1	2	2	1	1	1	4	3	1	2	1	2	4	1	4	2	1	2	2	2	2	1	1	1	5	3	2	4	5	4	4	5	4	3	4	5	4	2	3
474	2025/5/17 18:01:57	184秒	微信	N/A	183.130.158.108(浙江-温州)	2	2	5	2	3	1	1	2	4	4	4	5	2	3	3	1	2	4	3	2	4	2	1	1	3	1	1	2	1	1	5	1	1	1	4	2	2	2	1	1	2	2	2	5
63	2025/5/17 17:34:31	214秒	微信	N/A	114.231.89.253(江苏-南通)	1	1	1	3	1	1	1	5	1	1	5	3	2	1	1	2	3	3	2	4	5	4	2	1	1	5	2	2	3	3	2	2	2	2	1	4	2	2	2	2	1	3	5	1
212	2025/5/17 17:44:02	253秒	微信	N/A	125.87.86.194(重庆-重庆)	2	2	4	1	4	4	1	3	2	1	2	2	1	1	2	3	2	2	2	2	3	2	1	1	2	2	3	1	3	2	5	1	1	1	3	5	5	1	1	3	1	1	1	1
282	2025/5/17 17:48:47	300秒	微信	N/A	125.87.89.67(重庆-重庆)	1	2	4	2	2	1	2	2	2	3	2	2	3	2	2	2	2	2	2	2	1	1	1	3	5	3	4	1	3	5	5	3	4	4	5	2	4	4	2	3	1	3	2	1
446	2025/5/17 18:00:06	227秒	微信	N/A	122.230.33.195(浙江-湖州)	1	2	6	1	1	1	1	4	1	3	4	5	2	1	2	1	2	4	3	4	4	2	2	2	1	2	2	1	3	4	3	4	5	4	5	2	5	4	4	1	1	5	2	1
481	2025/5/17 18:02:19	229秒	微信	N/A	122.230.33.241(浙江-湖州)	1	1	3	1	2	2	3	2	2	1	2	1	4	2	2	2	1	2	2	1	2	3	5	4	2	4	4	4	5	4	4	4	3	5	4	5	4	4	5	1	1	1	1	3
198	2025/5/17 17:43:14	279秒	微信	N/A	110.87.249.136(福建-三明)	2	1	1	1	1	2	2	2	2	1	1	2	2	2	1	2	1	2	1	1	3	2	2	2	1	1	2	3	1	5	5	4	5	4	5	4	4	5	2	3	3	1	1	1
62	2025/5/17 17:34:23	193秒	微信	N/A	180.105.234.253(江苏-连云港)	1	1	4	2	2	2	3	1	1	2	1	4	2	2	2	4	2	2	1	1	1	3	1	3	2	1	1	3	1	5	5	5	4	4	4	4	4	4	5	2	2	4	3	1
257	2025/5/17 17:47:03	284秒	微信	N/A	111.72.197.189(江西-鹰潭)	1	2	6	2	1	2	1	2	4	2	2	1	2	2	1	3	4	2	2	1	1	5	1	2	1	2	4	1	1	1	3	2	1	4	1	5	2	4	4	2	2	2	2	1
378	2025/5/17 17:54:41	270秒	微信	N/A	118.113.245.213(四川-成都)	1	1	4	4	4	1	3	1	4	2	3	3	3	3	5	5	1	1	1	4	4	2	1	4	1	2	4	1	1	3	5	3	2	4	1	3	5	2	3	4	1	2	3	3
40	2025/5/17 17:33:08	253秒	微信	N/A	125.87.90.197(重庆-重庆)	1	1	2	4	1	1	1	3	4	4	5	2	1	3	1	2	2	3	3	2	2	1	4	4	4	5	4	3	4	5	5	3	4	4	5	5	4	4	4	2	1	1	1	1
312	2025/5/17 17:50:35	218秒	微信	N/A	111.72.133.32(江西-宜春)	1	2	7	4	3	5	4	4	5	2	4	2	4	4	3	1	2	3	2	3	4	3	4	1	3	3	1	4	3	4	3	5	5	3	5	4	5	4	5	2	1	1	2	1
649	2025/5/17 18:13:54	296秒	微信	N/A	125.87.80.81(重庆-重庆)	2	2	7	4	4	4	4	4	4	3	4	3	5	2	3	1	4	5	2	5	4	1	1	1	2	3	4	4	2	4	4	5	4	5	4	4	5	5	4	2	4	2	1	4
68	2025/5/17 17:34:47	191秒	微信	N/A	27.156.187.49(福建-宁德)	1	2	4	1	2	3	2	2	2	2	2	1	1	1	2	1	2	1	4	2	3	1	1	2	2	2	1	2	3	5	5	4	5	4	5	4	4	4	4	5	4	4	3	2
65	2025/5/17 17:34:44	295秒	微信	N/A	121.207.49.62(福建-泉州)	2	1	3	2	1	2	1	3	1	2	2	2	2	1	3	1	1	3	2	2	2	1	2	1	2	5	1	3	3	4	3	4	3	3	4	4	4	5	5	2	3	1	2	4
569	2025/5/17 18:08:07	299秒	微信	N/A	183.130.137.108(浙江-温州)	2	1	1	4	1	1	1	3	3	1	1	1	5	1	3	3	1	3	2	2	3	1	2	1	2	1	3	2	1	4	4	5	4	4	4	5	5	4	4	1	1	2	2	2
34	2025/5/17 17:32:48	221秒	微信	N/A	171.83.248.12(湖北-黄冈)	2	1	1	1	1	5	1	2	1	3	3	2	1	4	1	1	4	1	2	3	2	1	4	3	1	1	1	1	2	5	4	4	5	4	4	5	5	2	5	2	1	5	1	1
43	2025/5/17 17:33:18	283秒	微信	N/A	180.105.129.134(江苏-连云港)	2	1	4	2	1	2	1	2	3	2	1	1	4	2	2	2	2	2	1	2	2	1	4	4	4	4	2	5	4	5	5	4	4	5	5	5	5	5	3	2	2	2	2	1
15	2025/5/17 17:31:27	227秒	微信	N/A	106.111.232.108(江苏-镇江)	1	1	3	2	3	1	2	2	1	3	2	2	5	1	3	2	2	5	2	3	5	2	1	1	5	1	1	5	2	1	1	3	1	1	1	1	1	2	3	2	2	2	4	3
67	2025/5/17 17:34:47	258秒	微信	N/A	27.156.187.186(福建-宁德)	1	1	4	4	1	2	3	1	4	3	2	2	2	2	3	5	1	1	2	4	5	5	3	1	1	2	2	2	3	2	2	2	2	1	2	2	2	1	2	2	3	5	5	4
227	2025/5/17 17:44:59	230秒	微信	N/A	117.42.94.168(江西-抚州)	1	1	3	2	1	1	2	2	5	2	2	2	5	1	1	4	3	3	4	1	1	3	4	4	4	3	4	4	4	2	2	1	1	2	2	3	1	1	1	1	1	1	1	4
361	2025/5/17 17:53:32	229秒	微信	N/A	123.189.114.86(辽宁-鞍山)	1	2	5	2	4	4	2	5	5	4	5	4	4	2	5	4	2	3	5	3	5	5	4	1	3	1	4	1	2	1	1	1	5	5	3	1	1	1	2	2	2	2	1	3
377	2025/5/17 17:54:36	183秒	微信	N/A	117.90.217.191(江苏-镇江)	1	1	2	1	4	1	3	2	4	1	3	3	2	4	4	2	5	5	5	5	5	4	3	4	4	5	4	4	5	1	1	1	1	2	3	1	2	2	2	1	1	5	4	2
35	2025/5/17 17:32:50	319秒	微信	N/A	218.86.72.45(福建-宁德)	1	1	1	4	3	4	4	4	5	5	5	3	4	1	5	3	4	5	2	5	4	5	3	4	3	5	4	5	2	2	4	1	1	2	2	1	1	2	1	1	2	1	1	5
469	2025/5/17 18:01:38	285秒	微信	N/A	140.237.13.237(福建-莆田)	2	1	2	1	1	2	1	2	2	2	2	2	1	2	2	1	2	3	2	1	2	1	1	1	1	2	2	1	2	2	2	2	2	2	1	2	2	2	1	2	2	2	2	3
92	2025/5/17 17:36:29	185秒	微信	N/A	221.227.177.36(江苏-南通)	1	1	3	1	2	2	1	1	2	2	2	3	1	2	2	2	1	1	2	1	2	2	2	1	3	3	5	1	1	1	1	2	1	2	2	2	2	3	1	2	1	3	1	2
150	2025/5/17 17:40:03	182秒	微信	N/A	125.87.91.20(重庆-重庆)	1	1	1	3	3	4	1	1	1	3	2	2	2	1	1	1	1	2	4	1	1	2	1	1	2	4	4	2	1	2	2	2	2	1	1	1	2	1	1	3	2	2	1	1
284	2025/5/17 17:49:05	271秒	微信	N/A	111.72.198.195(江西-鹰潭)	2	1	2	2	2	1	2	2	2	3	2	1	2	4	2	1	3	3	2	2	1	3	2	2	1	1	2	2	2	1	2	2	3	1	1	1	2	1	2	2	3	1	2	1
188	2025/5/17 17:42:34	188秒	微信	N/A	220.190.60.136(浙江-温州)	2	1	2	1	2	4	1	1	1	5	1	2	1	4	1	1	1	2	4	2	3	4	2	2	2	1	2	2	2	1	1	1	3	2	2	2	2	1	3	2	1	1	2	5
193	2025/5/17 17:42:51	218秒	微信	N/A	125.78.229.181(福建-莆田)	1	1	2	2	2	1	4	1	4	3	2	3	1	5	1	1	1	1	4	1	4	2	2	1	1	1	2	1	5	3	1	3	1	3	1	4	3	1	1	2	2	1	2	4
333	2025/5/17 17:51:52	282秒	微信	N/A	125.87.84.187(重庆-重庆)	1	1	2	3	2	2	3	2	4	4	2	1	5	1	2	5	1	5	2	4	2	5	4	1	1	2	2	2	2	1	3	2	3	4	1	3	3	1	4	2	2	1	2	2
153	2025/5/17 17:40:12	201秒	微信	N/A	111.72.198.198(江西-鹰潭)	1	2	5	1	5	5	2	2	1	2	4	3	1	5	5	5	5	5	3	4	3	5	3	5	5	5	3	5	5	4	3	3	4	1	5	2	3	5	2	1	3	1	1	5
320	2025/5/17 17:51:03	257秒	微信	N/A	218.66.247.10(福建-宁德)	1	2	4	3	2	1	2	1	3	1	3	2	1	1	2	3	3	3	2	4	1	2	2	1	1	2	1	2	2	2	5	4	4	5	4	4	5	3	4	1	2	2	2	4
114	2025/5/17 17:38:00	246秒	微信	N/A	123.189.112.25(辽宁-鞍山)	1	1	2	5	4	4	3	4	4	5	2	5	4	2	1	1	1	1	1	1	1	1	5	1	3	3	2	1	2	1	1	2	2	2	2	1	2	2	2	5	4	5	4	1
363	2025/5/17 17:53:38	265秒	微信	N/A	27.153.140.243(福建-莆田)	1	1	2	4	5	5	4	3	4	3	2	4	5	3	5	5	2	4	4	3	2	2	5	2	4	2	4	1	3	1	2	1	1	1	4	1	1	2	3	5	3	3	4	4
372	2025/5/17 17:54:15	211秒	微信	N/A	111.72.129.178(江西-宜春)	1	2	6	1	2	4	3	2	1	1	3	3	5	4	4	5	5	4	5	4	3	5	3	5	4	5	5	5	4	1	1	1	3	4	2	1	3	1	1	1	1	2	5	5
191	2025/5/17 17:42:46	273秒	微信	N/A	171.41.151.33(湖北-荆门)	2	2	7	4	4	3	4	2	5	4	4	3	5	1	4	2	5	1	3	5	2	1	5	5	5	4	5	5	4	1	3	3	2	2	4	1	5	2	3	2	1	3	1	2
411	2025/5/17 17:57:16	216秒	微信	N/A	27.153.142.24(福建-莆田)	2	2	4	1	1	2	2	1	1	1	1	2	1	4	2	2	1	2	1	1	2	1	2	1	3	4	4	1	2	2	3	1	3	5	3	2	4	4	2	1	2	2	2	4
237	2025/5/17 17:45:53	281秒	微信	N/A	183.142.59.159(浙江-湖州)	2	1	4	1	2	3	2	4	2	1	1	1	3	2	1	1	4	1	2	2	1	4	2	2	3	1	1	2	1	2	4	5	4	4	3	3	4	3	2	3	1	2	3	5
349	2025/5/17 17:52:52	187秒	微信	N/A	125.87.90.207(重庆-重庆)	1	1	2	4	1	1	4	1	1	1	3	1	4	2	3	2	4	1	1	3	2	2	1	1	3	2	2	1	4	2	1	2	2	1	1	2	1	2	3	1	2	1	1	1
801	2025/5/17 18:28:33	304秒	微信	N/A	125.87.91.209(重庆-重庆)	2	1	3	2	1	1	5	1	4	4	2	1	1	1	2	1	3	3	2	1	4	5	3	2	3	1	2	2	2	1	4	2	1	2	2	3	3	1	2	2	2	2	1	2
564	2025/5/17 18:07:52	282秒	微信	N/A	27.150.94.196(福建-三明)	1	2	5	5	2	4	2	2	2	5	1	2	3	4	4	4	4	2	3	5	5	3	1	3	3	3	2	1	5	2	4	3	3	1	1	1	3	1	4	2	2	2	1	1
263	2025/5/17 17:47:28	289秒	微信	N/A	114.232.2.170(江苏-南通)	1	2	6	3	3	4	1	1	5	3	3	3	5	2	1	5	3	4	5	2	3	2	4	5	5	4	5	4	5	1	3	3	2	1	4	2	4	2	4	4	5	2	4	1
750	2025/5/17 18:23:26	280秒	微信	N/A	110.188.37.66(四川-成都)	2	2	6	1	1	2	2	2	1	2	4	2	2	3	2	1	1	1	4	1	1	2	1	1	1	2	2	1	2	1	5	4	3	1	1	2	5	4	2	1	1	4	3	2
136	2025/5/17 17:39:06	211秒	微信	N/A	171.41.130.11(湖北-荆门)	2	2	6	4	2	1	1	1	1	2	1	3	2	1	2	1	1	3	2	5	2	1	1	3	2	2	2	1	2	3	5	5	1	2	3	1	3	1	5	4	2	4	1	2
737	2025/5/17 18:21:57	193秒	微信	N/A	115.208.158.93(浙江-湖州)	1	1	4	1	3	2	2	1	1	2	2	2	2	3	2	1	1	1	2	1	1	3	1	2	4	3	5	1	2	5	4	5	4	4	5	4	4	2	2	1	2	5	1	1
342	2025/5/17 17:52:23	188秒	微信	N/A	114.231.89.200(江苏-南通)	1	1	1	5	4	5	4	3	4	4	3	5	3	4	1	2	1	1	1	1	2	1	1	2	2	1	1	1	1	2	2	2	1	1	4	2	1	2	3	2	1	1	1	2
412	2025/5/17 17:57:17	257秒	微信	N/A	27.24.186.193(湖北-咸宁)	1	1	2	4	5	5	1	3	5	1	1	2	5	4	2	3	4	3	2	5	3	4	1	3	2	2	1	2	3	3	4	1	1	4	2	1	2	1	2	2	2	3	2	4
632	2025/5/17 18:12:04	236秒	微信	N/A	220.190.16.217(浙江-温州)	1	2	5	5	4	2	3	3	4	3	4	5	5	4	2	1	4	3	5	1	5	5	4	3	2	1	1	2	2	1	4	1	3	3	4	1	2	4	1	1	1	3	1	1
211	2025/5/17 17:43:57	255秒	微信	N/A	220.190.49.114(浙江-温州)	2	1	4	5	3	3	2	5	1	1	3	1	5	4	5	5	4	5	4	5	3	5	4	5	5	5	5	4	3	3	3	1	2	2	3	2	5	4	3	1	2	3	2	1
644	2025/5/17 18:13:25	235秒	微信	N/A	114.231.91.163(江苏-南通)	2	1	3	4	4	2	1	5	2	2	3	5	1	5	5	5	4	4	5	5	5	5	5	5	4	5	5	5	3	2	3	1	5	2	4	5	5	4	3	5	5	5	4	4
44	2025/5/17 17:33:29	200秒	微信	N/A	123.189.114.204(辽宁-鞍山)	1	1	2	4	5	4	5	3	4	4	5	3	5	5	4	4	5	5	4	2	5	4	4	2	4	5	5	5	3	1	2	2	1	2	2	2	3	2	2	2	5	2	1	2
355	2025/5/17 17:53:15	218秒	微信	N/A	111.179.76.153(湖北-咸宁)	1	1	3	4	4	5	5	4	4	4	5	4	5	5	5	5	4	5	5	5	5	5	5	4	5	4	5	5	4	2	2	1	2	5	4	1	4	4	5	1	2	1	1	5
425	2025/5/17 17:58:22	218秒	微信	N/A	202.101.213.88(江西-抚州)	1	2	6	4	5	4	1	1	4	5	1	2	5	1	2	4	2	2	3	1	4	5	5	2	1	2	2	4	2	4	4	2	4	4	2	5	3	4	2	5	1	3	5	1
478	2025/5/17 18:02:15	182秒	微信	N/A	114.232.2.176(江苏-南通)	2	2	5	5	4	4	5	5	2	2	5	4	4	2	1	1	2	1	2	1	1	3	3	3	5	5	5	4	2	4	4	4	4	3	3	4	2	5	2	1	2	2	2	4
336	2025/5/17 17:52:02	274秒	微信	N/A	125.87.86.35(重庆-重庆)	1	1	3	1	3	1	3	5	1	4	4	2	5	4	3	1	5	1	1	5	2	2	4	4	5	5	5	5	5	1	1	1	1	1	2	2	1	3	1	1	5	1	2	1
83	2025/5/17 17:35:44	281秒	微信	N/A	117.90.217.172(江苏-镇江)	2	1	3	4	5	5	3	1	1	4	5	2	1	4	4	4	5	5	5	5	4	5	4	5	5	4	5	4	4	1	1	2	2	2	1	2	2	1	2	2	1	2	2	1
253	2025/5/17 17:46:48	280秒	微信	N/A	125.87.93.31(重庆-重庆)	2	2	5	4	5	4	5	5	4	4	2	4	5	4	4	4	4	4	5	4	4	3	4	4	4	4	4	5	3	2	2	3	1	2	2	1	1	1	2	4	2	1	5	2
746	2025/5/17 18:23:09	322秒	微信	N/A	125.87.92.208(重庆-重庆)	1	2	4	4	4	4	5	4	4	5	3	4	4	4	5	4	5	4	5	4	5	4	4	5	4	5	4	4	5	2	4	1	1	3	4	2	1	1	2	3	1	2	1	5
16	2025/5/17 17:31:32	268秒	微信	N/A	183.130.157.45(浙江-温州)	1	2	7	4	5	5	5	5	4	3	4	5	5	4	5	5	4	5	3	5	5	4	5	5	5	5	5	4	2	2	3	1	1	2	1	2	3	4	2	2	2	1	1	4
294	2025/5/17 17:49:29	225秒	微信	N/A	180.120.9.98(江苏-南通)	1	1	3	2	1	3	4	3	4	5	2	2	3	2	3	4	3	4	4	4	5	5	4	1	3	1	4	1	4	5	2	1	1	5	4	2	3	1	1	2	1	2	1	1
435	2025/5/17 17:59:21	256秒	微信	N/A	218.86.67.3(福建-宁德)	2	2	5	5	4	2	2	5	5	5	4	4	5	4	4	4	5	4	3	4	4	5	1	3	5	1	4	5	1	1	2	4	4	3	1	4	2	5	1	3	4	4	3	1
839	2025/5/17 18:32:06	259秒	微信	N/A	125.125.128.127(浙江-湖州)	2	1	4	4	3	5	4	5	4	4	5	5	2	5	4	2	5	5	5	4	4	3	3	3	4	4	5	4	4	4	4	3	4	4	5	4	4	4	2	2	2	3	3	4
167	2025/5/17 17:41:12	225秒	微信	N/A	218.90.85.236(江苏-无锡)	2	1	1	4	5	5	4	5	5	4	5	3	3	4	5	4	5	5	4	4	4	4	4	5	4	3	3	5	5	5	5	4	3	4	5	2	4	3	4	2	2	1	2	3
137	2025/5/17 17:39:07	270秒	微信	N/A	121.235.204.61(江苏-无锡)	2	2	5	1	1	1	1	1	2	2	2	2	1	1	1	2	1	2	3	1	4	1	4	2	2	2	3	2	2	5	4	5	5	3	5	2	4	4	4	2	4	1	2	2
261	2025/5/17 17:47:20	254秒	微信	N/A	218.91.189.144(江苏-南通)	1	2	4	2	1	1	1	2	2	1	2	2	4	2	2	3	2	1	1	2	4	2	1	3	1	2	1	1	2	4	4	5	5	4	4	4	4	4	4	1	3	1	3	3
738	2025/5/17 18:22:00	222秒	微信	N/A	125.87.90.117(重庆-重庆)	1	2	6	1	3	3	3	1	2	1	3	1	2	2	1	3	2	2	2	1	3	2	1	2	2	2	1	2	2	3	5	3	3	4	5	5	5	5	5	4	3	3	2	5
424	2025/5/17 17:58:22	240秒	微信	N/A	125.87.85.195(重庆-重庆)	2	1	2	2	1	1	2	1	4	2	4	2	3	2	1	2	3	2	1	1	4	2	4	5	2	4	1	2	4	5	5	5	4	4	5	4	5	4	4	4	5	1	5	1
475	2025/5/17 18:02:02	316秒	微信	N/A	111.72.128.106(江西-宜春)	2	1	1	1	3	3	1	1	1	1	2	2	1	2	2	2	2	1	2	2	2	1	1	1	2	1	1	1	2	1	5	1	1	1	5	4	2	4	2	1	2	5	3	1
1018	2025/5/17 19:02:11	307秒	微信	N/A	125.125.227.239(浙江-湖州)	2	2	6	1	2	2	2	1	2	1	2	2	1	2	1	1	2	1	4	1	2	1	2	2	2	1	1	2	2	3	3	4	1	1	4	4	3	1	4	3	3	4	5	3
158	2025/5/17 17:40:35	182秒	微信	N/A	115.207.172.36(浙江-湖州)	1	1	1	2	1	3	1	4	1	2	3	2	2	2	2	1	1	3	2	4	3	2	1	2	2	2	1	1	2	2	4	5	2	4	2	3	4	2	4	2	1	2	1	3
992	2025/5/17 18:57:29	216秒	微信	N/A	180.105.234.218(江苏-连云港)	2	2	6	2	3	1	3	4	1	1	2	2	1	1	2	1	2	2	2	2	2	2	4	3	1	2	3	5	2	3	4	2	4	4	4	4	5	5	4	5	2	5	5	4
383	2025/5/17 17:54:51	211秒	微信	N/A	183.130.151.0(浙江-温州)	2	2	4	1	3	2	2	2	1	3	1	2	1	3	1	1	1	2	2	1	2	1	2	2	2	4	1	1	3	4	3	5	4	5	5	5	4	4	2	1	1	5	4	2
447	2025/5/17 18:00:06	231秒	微信	N/A	125.87.81.7(重庆-重庆)	1	2	6	2	1	2	2	2	3	1	1	1	1	1	2	1	5	3	4	2	1	3	2	1	4	1	2	2	2	4	5	3	4	4	3	5	4	5	4	1	1	2	1	1
33	2025/5/17 17:32:44	291秒	微信	N/A	125.87.80.22(重庆-重庆)	1	2	7	2	1	1	2	2	4	1	3	2	2	4	5	1	1	1	2	1	3	1	2	1	5	1	2	1	2	3	4	5	4	5	4	4	3	2	2	2	1	3	2	2
162	2025/5/17 17:40:56	297秒	微信	N/A	118.112.194.44(四川-成都)	1	1	3	2	3	5	2	1	2	1	4	1	1	3	1	2	4	1	3	1	2	3	1	5	1	2	1	1	1	4	5	4	5	3	5	5	5	2	3	3	3	1	4	2
75	2025/5/17 17:35:17	271秒	微信	N/A	125.87.86.96(重庆-重庆)	1	1	3	2	1	1	3	3	2	1	4	1	4	2	4	3	2	1	3	1	5	1	1	2	1	2	2	2	1	3	4	5	4	4	4	4	5	4	4	1	2	4	2	1
836	2025/5/17 18:31:43	302秒	微信	N/A	125.87.90.85(重庆-重庆)	1	2	4	1	2	1	2	2	2	2	4	2	1	2	2	3	3	2	1	1	1	1	5	3	3	4	4	4	5	4	2	4	5	4	5	4	3	5	5	5	5	3	5	3
9	2025/5/17 17:31:06	270秒	微信	N/A	220.190.43.206(浙江-温州)	2	1	3	1	2	3	2	3	2	2	3	2	2	2	2	3	3	1	4	1	1	2	4	2	4	1	5	3	4	5	5	4	3	5	5	4	4	5	4	4	3	2	3	2
96	2025/5/17 17:36:45	299秒	微信	N/A	125.109.62.17(浙江-温州)	1	1	2	4	1	3	3	2	1	2	5	1	1	2	2	2	2	3	3	4	1	3	3	1	1	3	2	1	2	4	3	1	2	3	4	2	5	1	2	1	2	3	3	5
72	2025/5/17 17:35:07	280秒	微信	N/A	110.86.178.225(福建-莆田)	1	2	6	2	3	4	5	3	2	2	5	2	5	4	1	4	5	4	2	3	5	1	2	2	4	1	1	3	1	4	4	3	2	3	1	3	4	1	2	3	1	1	1	2
444	2025/5/17 17:59:53	286秒	微信	N/A	125.125.139.142(浙江-湖州)	2	2	5	5	3	4	4	5	4	4	3	3	4	2	4	5	4	3	1	1	5	1	1	2	1	2	3	3	2	3	2	2	1	1	1	1	3	1	1	5	2	2	4	2
409	2025/5/17 17:56:44	219秒	微信	N/A	125.87.87.149(重庆-重庆)	1	1	1	4	3	2	1	3	4	3	1	2	5	4	5	4	4	4	3	2	3	5	1	1	2	4	4	5	1	1	1	1	2	2	2	2	3	1	2	5	1	1	2	1
823	2025/5/17 18:30:24	252秒	微信	N/A	123.189.115.150(辽宁-鞍山)	1	2	4	1	4	5	4	3	1	3	1	2	1	5	5	5	4	4	5	5	4	2	4	4	5	5	5	4	4	3	1	1	2	2	1	1	2	3	2	5	5	4	3	4
966	2025/5/17 18:52:15	299秒	微信	N/A	59.58.19.4(福建-宁德)	1	1	4	1	1	1	1	2	1	2	2	1	2	2	2	3	1	2	1	2	1	2	1	2	1	1	2	1	2	2	1	2	4	2	2	1	2	1	2	4	3	5	4	5
70	2025/5/17 17:34:59	299秒	微信	N/A	27.159.190.127(福建-宁德)	2	2	5	2	2	1	2	1	2	2	2	2	2	1	1	4	1	2	2	1	3	1	2	1	1	1	1	1	2	1	2	4	3	2	2	1	1	2	2	1	1	1	3	1
332	2025/5/17 17:51:52	275秒	微信	N/A	27.150.84.197(福建-三明)	2	2	6	1	2	2	3	2	2	1	2	2	1	1	2	1	1	2	2	2	3	1	2	3	2	4	2	1	2	1	3	4	1	4	3	2	1	1	3	5	4	5	4	4
132	2025/5/17 17:38:57	287秒	微信	N/A	111.72.194.177(江西-鹰潭)	1	1	1	2	4	1	5	2	2	3	2	3	4	1	3	2	2	2	3	2	3	3	2	1	2	1	2	1	1	1	3	5	1	4	3	3	2	1	1	2	2	4	2	4
512	2025/5/17 18:04:24	222秒	微信	N/A	180.105.53.95(江苏-连云港)	1	2	4	2	3	1	1	2	1	2	1	2	2	2	1	1	2	3	1	1	1	1	3	3	2	2	2	1	2	4	3	3	1	2	3	1	2	2	3	2	1	1	1	1
174	2025/5/17 17:41:38	299秒	微信	N/A	220.161.243.31(福建-宁德)	1	1	3	1	1	5	2	2	3	2	3	2	3	2	2	2	2	4	1	2	2	2	5	5	2	4	4	4	4	2	3	3	3	1	4	2	4	2	1	4	5	3	4	4
522	2025/5/17 18:05:05	256秒	微信	N/A	220.190.43.242(浙江-温州)	2	2	7	4	3	1	3	1	2	2	4	4	2	3	5	5	3	2	4	1	5	4	1	1	3	3	4	2	3	2	1	2	4	2	3	4	5	1	2	5	3	3	4	4
289	2025/5/17 17:49:21	259秒	微信	N/A	218.91.189.160(江苏-南通)	2	2	4	4	5	4	1	1	2	4	1	2	5	4	5	2	4	3	3	3	1	2	5	5	5	4	5	4	4	2	1	2	2	2	2	1	1	1	1	2	4	3	1	5
545	2025/5/17 18:06:31	275秒	微信	N/A	121.232.181.144(江苏-镇江)	1	2	7	4	5	4	4	3	4	5	4	4	3	3	4	4	4	1	4	2	3	4	2	4	1	5	4	4	3	2	2	1	1	2	2	2	1	2	1	4	5	4	4	4
334	2025/5/17 17:51:53	260秒	微信	N/A	180.112.240.35(江苏-无锡)	1	1	1	4	4	4	4	4	4	4	5	5	2	4	4	4	4	3	5	2	4	5	5	3	2	3	3	1	5	2	3	1	2	1	1	3	1	1	1	1	2	2	3	1
562	2025/5/17 18:07:36	296秒	微信	N/A	123.189.112.223(辽宁-鞍山)	1	2	5	4	4	4	4	3	3	5	5	4	4	4	5	4	3	3	4	5	4	2	5	5	3	2	5	2	2	1	2	2	2	1	1	1	2	2	3	2	2	1	3	4
144	2025/5/17 17:39:36	253秒	微信	N/A	125.78.226.139(福建-莆田)	2	1	1	2	2	1	1	4	2	1	1	3	2	2	3	2	1	2	2	3	1	1	1	1	2	1	1	3	1	1	3	1	2	1	1	3	2	2	2	1	4	2	1	1
501	2025/5/17 18:03:36	226秒	微信	N/A	171.41.128.36(湖北-荆门)	1	2	7	2	1	2	1	1	4	1	2	3	2	3	1	4	1	2	2	2	1	2	2	1	1	4	2	2	1	5	2	1	1	2	1	3	1	4	2	1	2	2	1	1
104	2025/5/17 17:37:18	261秒	微信	N/A	115.208.70.69(浙江-湖州)	1	1	2	4	3	4	4	2	2	1	4	1	5	2	2	4	2	3	2	4	1	2	1	2	1	1	3	1	2	2	4	4	2	2	2	2	2	1	2	2	1	1	4	4
163	2025/5/17 17:40:57	296秒	微信	N/A	171.83.248.154(湖北-黄冈)	1	1	3	1	4	1	1	1	2	4	1	4	4	2	2	3	2	3	3	1	1	1	2	3	4	4	3	3	4	1	2	2	2	1	2	4	2	2	1	2	5	5	2	4
200	2025/5/17 17:43:23	211秒	微信	N/A	110.86.173.104(福建-莆田)	2	2	5	4	2	2	2	1	2	2	5	1	5	2	4	1	4	4	1	2	1	1	3	4	5	5	5	3	3	3	1	1	1	1	3	3	2	3	1	1	2	1	1	5
54	2025/5/17 17:33:58	301秒	微信	N/A	125.87.88.4(重庆-重庆)	2	2	5	3	1	3	2	3	2	1	1	1	2	3	4	1	4	2	2	3	1	1	1	3	1	2	2	1	2	1	5	3	1	2	3	1	3	2	3	4	2	1	2	1
142	2025/5/17 17:39:28	222秒	微信	N/A	125.87.86.228(重庆-重庆)	1	2	4	1	4	3	3	1	1	1	1	3	1	2	1	2	2	1	1	2	2	2	4	3	3	1	2	3	4	1	2	3	4	2	3	2	5	1	2	1	2	1	1	2
579	2025/5/17 18:08:39	194秒	微信	N/A	218.6.107.124(福建-莆田)	2	1	2	1	2	3	2	1	4	2	4	2	1	2	2	1	2	5	3	1	4	1	1	2	1	2	3	1	2	1	2	2	2	1	2	1	1	4	2	4	2	5	4	2
226	2025/5/17 17:44:58	260秒	微信	N/A	183.143.204.153(浙江-湖州)	2	1	2	3	4	4	4	4	4	4	4	5	4	1	1	1	2	3	2	2	2	1	1	1	1	1	1	3	1	3	3	1	1	2	1	3	2	1	3	2	2	1	1	1
468	2025/5/17 18:01:32	263秒	微信	N/A	117.90.219.146(江苏-镇江)	2	2	7	1	1	2	5	3	3	4	4	2	4	2	4	1	3	1	3	1	4	5	5	2	2	1	2	2	3	1	2	1	5	5	1	4	2	3	2	3	2	1	1	5
119	2025/5/17 17:38:11	190秒	微信	N/A	111.72.128.53(江西-宜春)	2	2	7	5	5	4	4	3	2	5	4	4	4	3	4	4	2	4	5	4	2	2	3	1	3	1	4	3	4	2	5	2	3	2	2	3	2	5	1	1	1	1	2	2
182	2025/5/17 17:42:15	297秒	微信	N/A	27.148.204.190(福建-宁德)	1	2	5	2	1	3	1	1	1	2	1	3	2	3	1	1	1	2	1	3	2	2	1	2	2	1	1	3	2	4	2	2	3	2	4	4	1	5	1	5	5	2	2	4
360	2025/5/17 17:53:27	232秒	微信	N/A	117.90.156.110(江苏-镇江)	2	1	1	1	1	2	2	2	1	3	2	1	1	3	3	1	1	2	1	1	2	1	1	3	1	2	4	3	1	1	3	3	1	2	4	4	3	5	3	2	2	1	4	2
463	2025/5/17 18:01:12	198秒	微信	N/A	121.205.230.40(福建-莆田)	1	2	7	1	1	2	2	1	1	3	1	1	2	2	1	1	1	2	2	1	3	3	5	1	1	1	4	4	1	2	2	1	2	2	2	1	2	1	2	2	3	2	2	5
166	2025/5/17 17:41:06	231秒	微信	N/A	118.122.108.106(四川-成都)	2	2	6	3	3	1	2	2	1	2	2	1	1	3	1	2	1	3	1	1	2	4	1	2	1	3	2	2	2	2	2	3	1	4	1	1	1	3	2	2	1	1	2	1
216	2025/5/17 17:44:14	245秒	微信	N/A	180.105.234.232(江苏-连云港)	1	1	2	3	1	1	3	3	4	1	2	1	2	3	2	1	1	3	4	1	3	1	1	1	1	2	1	4	2	1	2	4	2	1	2	3	1	3	1	1	1	1	2	3
532	2025/5/17 18:05:38	216秒	微信	N/A	125.87.92.131(重庆-重庆)	1	1	3	1	1	3	2	2	2	2	4	1	2	1	4	5	1	2	3	1	3	2	1	1	3	1	2	2	3	4	3	1	1	4	3	2	5	1	1	2	5	5	5	2
259	2025/5/17 17:47:15	265秒	微信	N/A	180.127.246.85(江苏-连云港)	1	2	5	2	1	4	2	4	1	2	1	2	5	1	1	5	3	5	2	3	2	2	1	1	1	2	4	1	2	3	1	4	2	3	3	2	1	5	2	1	3	2	2	4
396	2025/5/17 17:55:33	299秒	微信	N/A	111.72.133.58(江西-宜春)	1	2	7	4	1	1	3	4	1	1	4	5	1	3	1	4	2	1	1	2	4	4	4	4	4	4	3	4	5	4	5	3	2	3	1	4	5	1	3	4	2	4	4	4
598	2025/5/17 18:09:40	217秒	微信	N/A	117.26.192.203(福建-莆田)	2	2	4	2	4	3	5	4	4	4	4	3	3	2	2	5	4	4	2	2	1	5	4	3	1	4	3	1	3	5	5	3	4	4	3	5	4	3	3	4	4	5	4	3
20	2025/5/17 17:31:54	193秒	微信	N/A	27.158.127.89(福建-三明)	1	1	4	1	4	5	2	5	1	4	3	3	2	4	5	4	5	2	4	5	4	2	4	4	4	2	2	1	2	5	4	4	2	4	5	4	4	3	4	1	3	2	1	5
491	2025/5/17 18:02:59	293秒	微信	N/A	182.132.24.91(四川-德阳)	1	2	6	3	1	5	3	1	3	2	4	4	3	4	5	2	5	5	2	5	4	4	2	2	4	5	3	2	3	2	1	2	1	1	2	1	1	2	2	1	2	2	5	1
189	2025/5/17 17:42:42	282秒	微信	N/A	144.255.44.25(山东-烟台)	1	2	7	3	4	4	5	4	4	3	5	4	4	4	5	1	5	3	3	3	3	2	3	2	4	5	4	2	4	3	1	1	1	1	2	2	2	2	3	2	3	1	1	2
419	2025/5/17 17:58:00	244秒	微信	N/A	123.189.114.35(辽宁-鞍山)	2	1	2	5	2	4	5	5	4	4	5	4	3	4	5	4	4	5	2	1	4	3	3	1	4	3	4	2	5	2	2	2	2	2	2	2	3	2	1	2	1	4	1	1
101	2025/5/17 17:37:10	186秒	微信	N/A	110.86.177.130(福建-莆田)	1	1	2	3	2	5	2	3	1	2	4	3	2	3	5	5	5	4	3	5	4	5	4	4	4	5	5	4	4	1	1	1	2	3	4	4	3	4	2	4	2	4	2	1
454	2025/5/17 18:00:32	298秒	微信	N/A	117.90.223.4(江苏-镇江)	1	2	7	3	5	3	5	4	4	5	4	5	3	4	5	2	3	2	5	4	5	3	4	4	2	4	4	4	4	2	1	1	2	1	4	2	2	2	4	1	5	2	2	4
131	2025/5/17 17:38:54	251秒	微信	N/A	183.130.152.119(浙江-温州)	1	2	7	4	5	5	4	3	5	3	5	4	5	4	3	5	5	3	5	4	4	4	5	4	4	4	4	5	4	1	4	1	2	4	1	2	4	4	3	2	1	2	3	1
766	2025/5/17 18:24:55	244秒	微信	N/A	121.207.144.127(福建-厦门)	1	1	2	5	3	4	4	4	5	5	5	5	4	5	4	5	4	4	4	3	5	3	4	5	4	3	4	5	4	3	5	1	2	4	1	1	1	1	3	3	2	5	2	4
739	2025/5/17 18:22:14	247秒	微信	N/A	111.72.129.248(江西-宜春)	2	1	2	4	5	4	5	4	4	5	3	4	4	3	5	4	4	4	4	5	3	5	4	4	4	4	2	5	5	1	4	3	5	4	2	1	5	1	1	2	1	1	1	1
225	2025/5/17 17:44:57	237秒	微信	N/A	125.125.193.153(浙江-湖州)	1	2	4	5	4	5	4	4	4	5	4	5	5	4	5	5	4	5	4	5	2	4	4	4	2	5	5	5	4	1	4	4	3	4	2	3	3	1	5	2	4	2	1	3
752	2025/5/17 18:23:54	203秒	微信	N/A	125.87.94.27(重庆-重庆)	1	1	4	5	4	1	2	3	3	1	3	2	1	5	3	1	3	3	4	3	3	4	1	3	5	1	2	4	1	1	5	2	1	4	4	3	3	4	5	1	1	1	1	4
262	2025/5/17 17:47:25	290秒	微信	N/A	120.43.33.179(福建-宁德)	2	1	3	2	1	1	3	1	5	3	2	2	5	2	2	2	1	1	3	3	5	3	4	5	3	4	5	2	5	1	5	3	1	3	3	1	5	5	5	1	1	4	5	1
812	2025/5/17 18:29:37	389秒	微信	N/A	111.72.133.179(江西-宜春)	2	2	6	3	4	5	5	5	5	5	3	5	4	5	5	2	4	5	5	2	5	5	4	4	4	4	4	4	4	2	4	5	5	2	1	2	4	5	3	2	1	1	1	1
410	2025/5/17 17:57:08	256秒	微信	N/A	117.26.193.190(福建-莆田)	2	1	1	5	5	5	5	5	4	5	4	5	3	5	5	5	4	3	4	5	4	5	4	5	4	5	4	5	4	2	5	4	2	3	4	5	4	3	4	1	1	1	2	4
589	2025/5/17 18:09:09	200秒	微信	N/A	171.41.131.5(湖北-荆门)	2	2	6	1	5	2	2	1	4	2	1	3	1	1	2	4	1	2	2	2	3	2	5	3	4	4	4	2	3	4	5	4	5	5	4	2	5	4	3	5	4	4	3	4
971	2025/5/17 18:53:03	263秒	微信	N/A	183.130.141.6(浙江-温州)	2	2	7	1	1	1	3	5	5	1	3	2	3	4	4	5	3	5	1	1	2	5	3	1	5	1	2	3	2	2	1	2	2	2	1	1	2	1	1	5	5	5	4	3
876	2025/5/17 18:37:12	235秒	微信	N/A	180.127.247.49(江苏-连云港)	2	2	6	5	3	3	4	4	4	5	5	5	5	4	5	2	4	5	4	4	4	4	5	4	4	4	4	4	4	2	1	2	1	2	2	1	2	2	1	3	5	4	5	4
905	2025/5/17 18:41:07	250秒	微信	N/A	218.87.205.216(江西-抚州)	2	2	4	4	4	5	4	5	5	5	4	4	4	5	4	3	5	5	4	4	5	2	5	4	4	5	3	2	5	3	3	4	4	4	4	5	5	4	4	5	3	3	5	4
967	2025/5/17 18:52:19	228秒	微信	N/A	111.179.92.169(湖北-咸宁)	1	2	5	4	4	3	5	5	5	5	3	4	3	4	5	4	4	4	5	4	4	4	3	4	4	5	5	5	5	3	4	5	1	2	3	4	2	2	2	5	5	4	5	4
605	2025/5/17 18:10:09	268秒	微信	N/A	114.232.86.112(江苏-南通)	2	1	2	4	4	5	3	4	5	5	5	3	5	4	4	5	5	5	4	4	5	4	4	5	4	4	4	4	4	4	3	2	4	4	5	5	1	5	2	5	4	5	5	4
894	2025/5/17 18:39:21	241秒	微信	N/A	117.86.65.7(江苏-南通)	1	1	2	5	5	4	4	5	4	4	5	5	2	5	5	5	5	5	3	5	5	5	4	4	5	5	4	4	3	4	4	4	2	3	2	5	4	5	4	5	4	4	5	2
266	2025/5/17 17:47:31	235秒	微信	N/A	125.87.81.198(重庆-重庆)	2	1	1	4	5	5	5	4	5	5	5	4	4	4	4	4	4	5	5	5	4	4	5	4	5	5	4	5	5	4	4	4	4	4	4	5	5	4	5	2	2	1	4	2
623	2025/5/17 18:11:20	257秒	微信	N/A	58.52.181.122(湖北-咸宁)	1	2	4	4	5	3	3	5	4	5	4	3	4	4	3	4	3	4	4	4	5	5	1	2	4	3	4	2	1	3	3	3	1	2	3	2	3	2	5	2	2	2	2	3
388	2025/5/17 17:55:00	199秒	微信	N/A	121.205.177.9(福建-宁德)	1	1	3	3	4	5	4	4	4	4	4	4	4	3	2	5	5	5	4	1	4	5	2	1	2	5	4	5	3	4	4	5	2	3	5	5	4	5	5	5	4	5	5	5
774	2025/5/17 18:25:36	285秒	微信	N/A	125.87.95.110(重庆-重庆)	1	2	6	5	2	4	4	5	1	2	3	2	4	5	5	4	5	4	4	5	5	4	5	4	5	4	4	5	5	5	4	5	5	5	3	4	5	4	4	5	4	3	5	4
927	2025/5/17 18:44:43	238秒	微信	N/A	120.43.34.13(福建-宁德)	2	2	6	5	5	3	4	4	5	5	4	4	5	5	5	4	4	4	5	2	4	4	4	4	4	4	4	5	4	5	4	3	5	5	5	4	4	5	4	4	5	4	3	4
1022	2025/5/17 19:02:53	263秒	微信	N/A	125.87.94.36(重庆-重庆)	1	1	2	4	5	5	5	4	4	4	5	4	5	4	4	5	4	5	4	4	4	4	4	5	3	4	5	4	5	4	3	4	5	5	5	5	5	5	4	4	5	4	5	5
347	2025/5/17 17:52:45	262秒	微信	N/A	111.72.194.179(江西-鹰潭)	1	1	2	4	5	3	4	5	5	5	2	5	4	5	4	3	3	5	5	5	5	5	5	4	4	5	4	4	5	5	4	5	5	5	5	4	3	4	5	1	1	2	2	2
41	2025/5/17 17:33:10	243秒	微信	N/A	58.52.152.175(湖北-咸宁)	1	2	7	4	5	4	3	5	5	4	5	5	5	5	5	4	5	4	4	4	4	4	4	4	5	5	5	4	4	1	4	3	1	5	2	2	5	1	2	1	5	3	4	1
800	2025/5/17 18:28:28	190秒	微信	N/A	111.72.133.0(江西-宜春)	1	1	4	4	4	3	2	4	2	3	3	1	3	4	4	4	1	1	4	4	1	1	1	2	1	5	2	2	4	1	3	4	2	2	1	5	4	4	3	5	3	5	3	5
313	2025/5/17 17:50:38	212秒	微信	N/A	183.130.158.187(浙江-温州)	1	1	1	3	5	3	5	4	3	2	5	4	2	2	3	1	2	3	4	5	2	2	4	3	3	1	5	1	1	4	2	5	3	4	5	4	4	4	2	3	4	1	2	2
314	2025/5/17 17:50:40	302秒	微信	N/A	183.130.147.57(浙江-温州)	1	1	4	4	1	5	2	1	5	2	4	1	4	5	3	4	4	4	5	2	4	5	4	2	1	2	5	3	2	4	3	4	2	3	4	5	5	4	3	1	1	1	2	1
81	2025/5/17 17:35:37	184秒	微信	N/A	117.26.194.229(福建-莆田)	1	2	4	4	4	5	5	2	4	4	5	4	3	4	2	5	5	5	3	4	4	4	2	5	2	2	2	3	1	5	4	3	2	4	4	4	5	5	4	2	5	2	3	2
771	2025/5/17 18:25:15	202秒	微信	N/A	111.72.129.91(江西-宜春)	2	2	6	4	3	4	4	5	4	5	5	5	2	3	4	4	5	3	4	4	5	5	1	2	2	3	4	3	4	4	4	4	5	4	5	3	4	4	3	4	2	4	2	4
245	2025/5/17 17:46:17	276秒	微信	N/A	49.76.134.51(江苏-无锡)	1	2	7	3	4	4	4	4	5	3	4	4	5	5	2	4	3	4	5	3	4	5	1	1	4	4	4	5	3	4	3	2	5	2	5	5	3	4	4	4	5	3	5	4
779	2025/5/17 18:26:05	254秒	微信	N/A	125.87.91.7(重庆-重庆)	2	1	2	5	3	4	4	4	4	5	5	4	3	5	4	4	5	3	3	4	5	4	2	1	3	4	4	4	2	5	3	3	4	5	4	4	3	4	4	5	4	5	4	2
600	2025/5/17 18:09:41	273秒	微信	N/A	27.159.189.51(福建-宁德)	2	1	3	3	4	4	4	5	2	5	4	5	4	4	3	4	2	5	5	5	2	4	2	4	5	4	3	3	4	4	2	4	3	4	4	3	5	5	5	2	3	5	5	5
659	2025/5/17 18:15:01	205秒	微信	N/A	49.70.190.151(江苏-镇江)	1	1	2	3	4	3	5	5	5	4	4	3	5	4	5	4	4	4	4	5	5	3	4	4	4	5	5	3	5	4	3	4	5	3	3	4	3	5	5	4	5	5	5	3
99	2025/5/17 17:37:01	230秒	微信	N/A	125.125.238.129(浙江-湖州)	2	1	3	4	4	5	4	5	2	5	5	5	5	3	5	3	3	4	4	5	5	5	5	3	4	4	4	5	4	4	4	4	3	5	4	4	5	4	4	1	1	2	2	3
55	2025/5/17 17:34:00	261秒	微信	N/A	218.66.247.224(福建-宁德)	1	2	7	3	4	5	4	4	4	4	5	3	5	5	5	4	4	4	5	4	3	5	5	4	5	5	5	3	4	5	4	5	4	5	2	5	5	4	3	5	1	1	2	4
981	2025/5/17 18:55:09	218秒	微信	N/A	121.205.222.51(福建-莆田)	2	2	7	5	5	4	4	3	4	5	5	3	5	5	5	5	4	5	4	5	3	5	5	4	3	3	5	4	5	2	5	4	4	5	5	5	4	4	5	4	2	4	5	5
964	2025/5/17 18:51:40	305秒	微信	N/A	121.206.143.133(福建-三明)	2	1	2	4	5	5	4	5	4	4	5	4	5	4	3	4	4	5	5	5	4	5	4	5	4	5	5	5	4	4	5	4	5	5	5	5	5	4	4	4	5	4	4	1
252	2025/5/17 17:46:45	251秒	微信	N/A	125.87.87.83(重庆-重庆)	2	1	3	4	5	4	4	5	5	4	5	5	4	5	5	4	2	5	4	4	4	4	5	2	5	4	5	4	4	1	5	1	4	1	5	3	5	1	2	2	4	2	1	2
298	2025/5/17 17:49:48	212秒	微信	N/A	144.255.40.6(山东-烟台)	1	1	1	5	5	5	4	4	4	5	5	2	4	4	5	5	4	5	4	5	4	5	5	5	5	4	5	4	4	1	5	3	4	3	2	2	4	2	3	2	1	1	4	1
192	2025/5/17 17:42:46	254秒	微信	N/A	121.205.231.11(福建-莆田)	2	1	2	5	2	5	4	5	4	4	4	4	4	4	4	4	5	4	4	5	5	4	5	4	4	3	2	4	3	3	4	4	5	5	5	4	5	4	4	1	1	3	1	2
310	2025/5/17 17:50:27	230秒	微信	N/A	118.113.246.96(四川-成都)	2	2	4	4	4	4	5	3	5	4	4	4	4	4	4	4	3	4	5	5	5	4	5	5	4	3	4	4	4	5	4	4	4	4	5	4	4	5	4	1	1	2	3	2
368	2025/5/17 17:53:53	195秒	微信	N/A	106.122.201.132(福建-厦门)	1	2	4	4	5	5	5	2	2	5	5	4	4	5	4	4	4	3	5	4	4	4	4	4	4	4	5	4	4	5	5	5	5	4	4	4	5	4	3	1	1	2	1	2
624	2025/5/17 18:11:33	193秒	微信	N/A	111.72.195.19(江西-鹰潭)	2	1	3	5	5	4	4	5	4	4	4	4	5	3	4	4	4	4	3	5	5	5	5	5	3	4	5	3	5	5	5	4	5	5	5	4	4	4	5	1	1	2	2	3
647	2025/5/17 18:13:50	328秒	微信	N/A	125.87.90.234(重庆-重庆)	2	2	6	5	2	4	4	5	3	4	5	5	5	4	4	4	4	4	5	5	4	5	5	4	3	4	5	5	5	4	4	3	5	4	4	4	5	4	4	4	3	5	4	4
668	2025/5/17 18:15:43	208秒	微信	N/A	61.154.91.219(福建-三明)	2	2	4	5	5	4	4	5	5	5	4	4	5	3	2	3	4	1	3	4	3	2	5	4	4	4	5	4	5	4	4	4	5	4	4	5	4	4	4	1	5	3	1	5
343	2025/5/17 17:52:26	280秒	微信	N/A	125.87.87.226(重庆-重庆)	1	1	1	5	5	4	5	3	5	3	5	5	5	4	5	4	5	5	4	4	2	5	3	5	5	4	5	4	4	5	4	4	5	5	4	4	5	4	4	2	1	1	1	5
47	2025/5/17 17:33:38	198秒	微信	N/A	118.112.194.58(四川-成都)	1	2	4	5	4	1	1	2	1	3	1	4	2	1	2	3	1	5	2	2	1	2	5	2	5	4	4	5	3	2	5	5	5	4	5	5	5	5	5	2	2	1	1	2
308	2025/5/17 17:50:14	188秒	微信	N/A	180.105.234.248(江苏-连云港)	2	2	6	4	4	3	3	4	4	4	5	4	4	2	5	3	1	3	5	1	1	4	3	1	2	2	1	2	3	5	3	5	2	5	5	4	5	4	5	1	1	4	4	5
585	2025/5/17 18:08:57	243秒	微信	N/A	49.70.190.134(江苏-镇江)	2	1	4	3	5	1	4	3	5	4	3	5	3	1	3	1	3	5	5	5	1	5	1	2	2	2	2	4	2	4	5	5	4	5	5	5	4	5	5	1	1	2	4	5
1019	2025/5/17 19:02:20	255秒	微信	N/A	27.24.182.205(湖北-咸宁)	1	1	4	4	2	5	2	5	5	4	1	4	2	2	4	4	4	5	2	5	4	5	5	3	3	1	2	1	4	5	5	5	5	5	4	5	5	4	4	5	1	2	2	4
552	2025/5/17 18:06:58	270秒	微信	N/A	125.87.83.152(重庆-重庆)	2	1	1	2	2	1	4	2	1	2	4	1	2	3	1	4	1	1	2	4	2	2	2	2	2	2	2	1	2	5	5	5	4	5	5	5	5	5	5	2	4	4	5	2
1001	2025/5/17 18:58:56	196秒	微信	N/A	183.143.173.68(浙江-湖州)	2	2	5	4	1	2	3	1	4	1	1	1	3	1	4	5	3	2	2	2	3	1	1	5	1	2	1	3	1	4	4	4	3	4	5	4	4	4	5	4	5	5	4	2
922	2025/5/17 18:43:26	295秒	微信	N/A	125.87.86.92(重庆-重庆)	1	2	5	1	2	1	4	3	2	3	4	4	2	3	5	1	2	2	3	3	4	1	2	2	1	2	1	2	3	4	4	5	4	4	4	4	4	4	5	5	3	4	5	5
544	2025/5/17 18:06:30	193秒	微信	N/A	111.72.129.200(江西-宜春)	2	2	4	3	1	1	1	4	1	3	1	1	1	4	5	4	4	4	4	4	3	3	2	4	2	3	2	3	2	4	4	4	3	3	5	5	5	4	5	5	4	3	4	4
856	2025/5/17 18:34:17	283秒	微信	N/A	114.231.59.241(江苏-南通)	1	1	3	4	4	5	4	4	5	5	2	4	3	3	3	4	5	1	3	1	4	3	1	2	3	2	2	3	1	4	5	4	2	4	5	5	5	5	4	4	4	5	5	5
517	2025/5/17 18:04:38	287秒	微信	N/A	218.86.66.18(福建-宁德)	1	2	5	2	4	4	4	5	4	3	4	3	5	3	1	1	5	3	5	2	3	5	1	1	3	5	5	4	1	4	4	4	4	4	5	5	4	5	5	5	4	5	4	3
855	2025/5/17 18:34:09	244秒	微信	N/A	110.82.143.150(福建-莆田)	2	2	5	2	3	1	1	2	3	1	2	3	3	3	2	3	2	1	2	1	5	1	5	2	1	1	1	2	2	5	5	5	5	5	5	3	4	5	3	4	4	4	4	1
535	2025/5/17 18:05:49	277秒	微信	N/A	27.158.124.164(福建-三明)	1	2	7	1	2	2	2	2	2	3	4	1	2	2	2	5	4	1	2	4	2	2	1	1	3	2	4	3	1	4	4	4	4	4	5	3	5	4	5	5	3	4	5	5
554	2025/5/17 18:07:03	271秒	微信	N/A	118.113.247.12(四川-成都)	1	1	3	2	2	1	2	2	2	1	2	2	1	4	3	2	5	5	4	5	4	4	1	2	4	2	3	5	1	5	3	5	5	4	4	5	3	4	4	5	4	5	4	5
215	2025/5/17 17:44:11	236秒	微信	N/A	171.41.128.180(湖北-荆门)	1	2	7	3	5	5	4	1	2	5	3	1	5	3	5	4	4	2	4	5	3	5	3	3	3	4	1	3	2	4	5	4	4	4	5	5	4	4	4	4	2	3	2	2
399	2025/5/17 17:55:54	193秒	微信	N/A	111.72.134.196(江西-宜春)	2	1	1	4	5	4	5	4	4	4	5	4	5	4	4	4	4	5	3	5	4	4	4	5	2	3	4	5	5	5	5	4	4	5	4	5	4	5	5	4	4	4	4	4
27	2025/5/17 17:32:11	264秒	微信	N/A	27.24.182.229(湖北-咸宁)	1	1	2	4	4	4	4	4	4	4	3	5	5	5	5	5	5	5	4	5	3	2	5	5	3	5	3	5	5	1	4	2	5	2	3	2	3	1	3	1	2	2	2	1
861	2025/5/17 18:35:07	181秒	微信	N/A	183.130.245.220(浙江-温州)	1	2	4	5	4	5	4	4	4	4	4	4	5	5	5	2	4	5	4	5	5	5	3	4	5	5	5	5	4	5	5	4	4	4	4	5	3	2	3	4	2	4	4	1
985	2025/5/17 18:56:12	190秒	微信	N/A	180.120.7.98(江苏-南通)	2	2	7	5	3	5	3	5	2	4	5	4	4	4	1	1	1	1	2	1	1	2	5	3	4	2	5	4	4	4	4	3	5	4	4	3	4	4	4	4	3	3	3	4
635	2025/5/17 18:12:27	256秒	微信	N/A	220.161.240.197(福建-宁德)	1	2	5	1	3	2	1	2	5	3	3	4	1	3	5	4	5	5	5	3	5	4	5	4	4	4	5	4	5	2	4	4	4	3	4	5	4	5	5	3	1	2	2	1
672	2025/5/17 18:16:09	260秒	微信	N/A	218.6.105.151(福建-莆田)	1	1	1	4	4	5	3	4	4	5	4	5	3	3	5	5	4	5	2	4	5	5	2	5	4	4	2	1	2	3	1	1	1	2	1	1	2	2	3	5	4	4	5	4
209	2025/5/17 17:43:50	193秒	微信	N/A	218.86.66.180(福建-宁德)	1	2	4	4	4	5	4	4	4	5	5	4	5	4	5	4	5	3	5	2	5	4	3	5	4	4	4	4	5	2	1	1	1	3	2	2	2	2	2	3	2	5	4	4
824	2025/5/17 18:30:37	259秒	微信	N/A	117.26.88.10(福建-莆田)	2	2	6	4	4	4	4	2	5	4	5	5	4	4	4	4	5	5	4	5	3	5	5	5	5	5	3	4	3	1	3	3	5	1	3	3	5	1	3	4	4	5	4	5
358	2025/5/17 17:53:24	270秒	微信	N/A	110.82.164.40(福建-莆田)	1	2	6	4	4	5	4	5	4	4	5	5	2	4	5	4	4	4	5	4	5	3	5	5	4	4	4	4	5	1	4	5	4	4	3	3	1	5	2	5	4	4	5	3
390	2025/5/17 17:55:07	260秒	微信	N/A	125.87.82.214(重庆-重庆)	1	2	4	3	5	4	4	5	5	5	4	4	4	5	4	5	5	5	5	5	5	4	4	4	2	5	4	5	5	1	3	1	2	1	1	2	1	2	2	1	2	3	2	4
318	2025/5/17 17:50:57	223秒	微信	N/A	125.87.92.227(重庆-重庆)	1	1	2	3	1	3	3	2	4	2	2	1	2	2	2	2	1	3	3	5	2	1	2	3	5	5	5	4	3	1	1	5	5	1	3	1	3	1	2	5	1	5	3	5
613	2025/5/17 18:10:39	232秒	微信	N/A	125.87.94.17(重庆-重庆)	1	2	5	5	1	4	2	1	3	1	1	2	4	4	1	1	1	1	3	3	5	2	2	5	5	4	4	4	4	5	4	3	4	5	4	5	3	2	3	4	4	5	5	2
587	2025/5/17 18:09:05	259秒	微信	N/A	27.159.186.180(福建-宁德)	1	2	6	5	4	4	2	4	3	5	3	4	5	1	1	1	1	2	1	2	1	2	3	4	3	3	4	4	5	5	3	5	4	5	4	4	4	3	2	4	4	5	5	4
465	2025/5/17 18:01:15	233秒	微信	N/A	58.52.166.193(湖北-咸宁)	2	2	5	2	4	4	1	4	4	3	4	3	3	3	2	5	3	5	4	3	1	1	5	3	1	3	3	2	2	4	4	4	4	4	4	4	4	3	5	5	5	5	4	3
790	2025/5/17 18:27:02	221秒	微信	N/A	183.130.235.100(浙江-温州)	1	1	1	4	5	4	3	4	4	4	4	4	2	1	5	2	1	4	5	5	2	1	4	3	2	4	4	2	2	5	5	4	4	5	3	5	3	4	4	5	5	4	5	4
725	2025/5/17 18:21:04	269秒	微信	N/A	202.101.213.165(江西-抚州)	2	2	5	4	4	5	3	4	4	4	5	2	4	3	3	5	2	4	5	4	5	4	1	4	3	4	2	1	1	5	4	5	5	5	4	4	5	5	3	4	5	5	5	5
989	2025/5/17 18:57:00	266秒	微信	N/A	110.82.142.128(福建-莆田)	2	2	5	5	3	4	5	4	5	5	4	3	5	5	2	4	5	5	3	4	5	4	4	4	5	4	5	3	2	2	3	4	1	2	2	3	3	5	2	5	4	4	4	5
996	2025/5/17 18:58:14	281秒	微信	N/A	118.113.246.113(四川-成都)	1	2	5	4	5	4	3	4	5	5	4	4	5	4	4	4	4	5	4	5	5	2	4	3	4	5	5	4	5	2	5	5	4	4	1	5	3	5	2	4	5	4	4	3
972	2025/5/17 18:53:08	292秒	微信	N/A	118.113.246.163(四川-成都)	2	1	3	4	3	5	4	5	5	5	4	5	5	5	5	4	2	4	5	4	5	4	5	4	4	5	4	4	4	3	4	4	4	4	4	5	4	4	3	3	4	4	5	5
224	2025/5/17 17:44:55	301秒	微信	N/A	171.83.248.14(湖北-黄冈)	1	2	7	5	4	3	4	5	4	4	4	5	5	5	4	4	5	4	5	5	5	4	4	5	3	3	5	5	4	5	5	5	4	3	4	5	4	3	4	4	1	4	1	4
769	2025/5/17 18:25:12	267秒	微信	N/A	118.113.244.163(四川-成都)	1	2	7	2	2	1	1	2	3	2	2	2	1	4	5	4	3	4	5	4	5	3	4	4	1	1	2	2	5	3	3	5	5	5	5	3	5	5	4	4	4	5	4	5
987	2025/5/17 18:56:32	268秒	微信	N/A	125.87.95.45(重庆-重庆)	1	2	5	1	2	3	1	5	4	2	2	3	5	5	4	4	3	4	3	4	4	4	2	3	1	5	2	3	3	5	4	5	5	4	4	5	4	4	4	5	5	5	5	1
656	2025/5/17 18:14:40	223秒	微信	N/A	121.205.220.26(福建-莆田)	2	2	7	5	5	4	4	5	4	4	4	4	4	4	5	4	4	5	5	5	4	4	4	5	4	5	4	3	4	2	4	1	3	3	1	5	5	3	1	4	5	5	4	4
610	2025/5/17 18:10:28	273秒	微信	N/A	125.125.236.185(浙江-湖州)	1	2	6	4	3	3	5	5	5	4	4	4	5	4	5	5	4	4	5	4	5	4	3	4	5	5	5	4	5	3	2	2	4	3	3	3	3	4	2	4	3	4	5	5
929	2025/5/17 18:44:59	217秒	微信	N/A	59.59.215.88(福建-三明)	1	1	2	1	4	4	5	1	4	3	1	1	2	4	4	4	4	3	5	4	2	3	4	1	2	1	5	3	2	5	2	5	5	5	4	4	4	4	5	3	5	4	4	5
838	2025/5/17 18:32:03	297秒	微信	N/A	218.86.72.5(福建-宁德)	1	2	6	4	4	3	3	3	4	5	4	4	4	4	5	1	5	4	2	2	2	1	5	1	3	4	4	1	3	5	5	4	4	5	4	5	3	5	5	5	3	5	4	1
1002	2025/5/17 18:59:07	226秒	微信	N/A	118.113.246.254(四川-成都)	2	1	2	2	3	2	5	4	4	5	3	3	2	3	5	4	2	4	5	2	4	5	2	2	1	2	5	5	2	4	5	5	5	4	4	4	5	5	5	4	4	5	4	5
874	2025/5/17 18:36:57	250秒	微信	N/A	125.87.89.16(重庆-重庆)	2	2	4	5	5	3	5	5	4	5	4	5	4	5	3	4	4	4	5	4	4	5	4	4	5	3	3	5	5	3	3	2	2	2	2	1	5	2	4	3	4	5	2	4
999	2025/5/17 18:58:37	225秒	微信	N/A	140.224.31.148(福建-泉州)	1	2	4	5	4	2	5	4	4	4	4	4	5	1	2	2	1	1	1	3	2	1	1	3	2	1	5	5	1	2	4	4	5	2	1	2	3	2	1	4	4	5	5	4
1031	2025/5/17 19:05:34	376秒	微信	N/A	202.101.213.115(江西-抚州)	1	1	2	5	2	4	5	2	2	3	4	2	1	4	4	3	4	5	4	4	2	4	5	1	3	1	4	3	1	1	3	4	2	3	4	1	3	5	2	4	4	5	4	3
669	2025/5/17 18:15:44	197秒	微信	N/A	111.72.132.158(江西-宜春)	1	2	6	2	2	3	5	1	1	4	4	3	4	5	5	5	4	4	5	5	4	5	5	4	4	5	4	5	5	5	5	1	1	3	3	3	2	2	5	5	5	4	5	5
788	2025/5/17 18:26:46	241秒	微信	N/A	140.250.148.83(山东-济南)	1	1	3	2	5	5	5	4	5	5	4	4	4	4	5	5	4	4	5	4	4	4	4	5	4	5	4	5	4	4	4	3	4	4	5	3	4	3	4	4	5	5	4	4
726	2025/5/17 18:21:05	218秒	微信	N/A	122.230.39.42(浙江-湖州)	1	1	2	3	4	5	5	5	4	4	3	5	4	4	5	4	5	4	5	4	4	5	5	5	3	4	5	5	5	4	4	4	5	4	5	4	4	3	4	5	2	4	3	4
281	2025/5/17 17:48:45	242秒	微信	N/A	144.255.44.110(山东-烟台)	1	1	4	4	5	5	5	5	4	4	5	4	3	5	5	4	4	5	5	5	5	5	4	4	5	4	4	4	5	4	4	3	5	4	4	5	4	5	4	4	5	4	4	1
494	2025/5/17 18:03:12	223秒	微信	N/A	106.110.186.13(江苏-连云港)	1	2	6	4	4	5	5	5	5	3	4	4	5	5	5	4	4	5	4	5	4	4	4	4	5	4	5	4	5	5	5	5	5	5	5	4	4	5	3	2	5	3	4	4
220	2025/5/17 17:44:36	214秒	微信	N/A	117.90.217.142(江苏-镇江)	1	1	3	4	5	5	5	5	4	4	5	4	5	5	3	5	5	2	4	4	5	4	5	4	5	5	4	5	5	4	4	4	4	4	5	4	5	2	5	4	5	5	5	1
86	2025/5/17 17:36:05	292秒	微信	N/A	125.87.93.33(重庆-重庆)	2	2	4	4	4	4	4	5	5	4	4	3	4	4	4	4	4	5	5	4	3	4	4	4	3	4	5	3	5	4	5	5	4	4	5	4	5	4	4	1	4	2	4	5
230	2025/5/17 17:45:15	296秒	微信	N/A	59.58.105.85(福建-莆田)	1	1	1	5	4	4	4	4	3	4	4	5	4	5	4	4	3	4	4	4	4	5	4	5	5	4	4	3	5	4	1	2	2	5	5	1	4	1	1	5	4	5	4	2
244	2025/5/17 17:46:14	216秒	微信	N/A	222.212.224.126(四川-成都)	1	2	4	4	5	5	4	2	5	3	5	5	5	5	5	4	5	4	4	4	4	5	3	5	5	4	5	5	4	1	3	2	2	3	5	4	2	5	1	2	4	3	1	4
397	2025/5/17 17:55:51	227秒	微信	N/A	125.125.130.64(浙江-湖州)	2	2	4	5	5	3	4	3	4	5	4	4	4	4	4	5	4	4	4	4	5	2	3	2	4	4	4	5	5	2	4	2	1	5	1	5	2	2	4	2	2	1	1	4
845	2025/5/17 18:32:43	307秒	微信	N/A	111.72.199.164(江西-鹰潭)	1	2	7	5	4	4	4	4	4	5	2	5	4	5	4	5	2	5	3	4	5	4	4	3	5	5	4	3	3	3	4	5	5	4	3	5	5	3	5	4	5	3	2	5
306	2025/5/17 17:50:10	192秒	微信	N/A	118.113.245.254(四川-成都)	1	2	5	5	5	4	5	5	2	4	4	5	4	5	4	3	4	5	5	4	4	5	4	2	4	5	4	5	5	5	5	4	3	4	5	2	4	5	5	2	4	5	4	4
941	2025/5/17 18:47:24	256秒	微信	N/A	111.72.198.139(江西-鹰潭)	2	2	7	5	5	2	5	5	4	3	5	5	4	4	5	3	3	3	5	4	4	5	5	3	4	5	4	4	4	4	5	4	5	4	4	5	4	4	4	4	2	5	3	4
146	2025/5/17 17:39:43	204秒	微信	N/A	125.87.81.96(重庆-重庆)	2	2	6	4	4	3	5	5	5	5	5	4	4	4	5	3	3	5	4	4	4	5	4	4	5	4	4	4	4	4	4	4	4	4	4	4	4	4	5	2	1	3	2	5
219	2025/5/17 17:44:27	240秒	微信	N/A	121.226.101.194(江苏-南通)	1	2	7	3	2	3	2	2	1	2	1	2	1	1	2	2	1	2	2	1	1	2	3	2	4	1	3	1	5	5	4	4	5	2	4	4	5	5	4	1	4	3	3	4
464	2025/5/17 18:01:15	263秒	微信	N/A	125.109.57.29(浙江-温州)	1	1	4	1	4	3	5	2	1	3	5	2	3	2	4	4	5	3	1	3	3	1	3	2	1	2	2	1	1	4	4	5	5	5	3	5	4	4	5	4	4	5	4	5
430	2025/5/17 17:58:53	279秒	微信	N/A	171.41.151.246(湖北-荆门)	1	1	4	4	5	4	3	2	4	4	5	5	5	1	2	1	2	2	2	2	1	1	1	1	2	4	3	4	2	4	5	5	4	5	5	4	4	5	3	4	4	4	4	5
305	2025/5/17 17:50:03	230秒	微信	N/A	114.229.32.111(江苏-镇江)	1	1	2	5	3	3	4	3	3	3	5	4	4	1	1	1	1	1	3	2	2	1	3	3	3	3	4	5	4	4	5	4	5	5	3	4	3	3	5	3	5	1	3	5
607	2025/5/17 18:10:16	295秒	微信	N/A	222.189.106.55(江苏-连云港)	2	2	6	2	1	5	3	5	1	1	3	3	2	5	2	3	5	3	3	1	5	3	5	5	5	5	5	5	3	5	3	5	4	5	3	5	5	4	5	2	3	4	1	2
909	2025/5/17 18:41:39	300秒	微信	N/A	121.205.231.50(福建-莆田)	1	1	3	1	1	1	2	1	1	1	2	2	2	1	2	1	1	1	2	1	2	2	2	1	2	1	1	2	1	5	5	5	4	4	5	4	4	4	5	4	5	2	5	5
914	2025/5/17 18:42:24	267秒	微信	N/A	59.58.149.149(福建-莆田)	2	2	7	2	1	1	2	3	1	2	1	2	3	3	2	2	1	1	1	1	3	2	1	1	1	2	2	1	1	4	4	4	4	5	5	5	4	5	5	2	2	2	1	5
882	2025/5/17 18:38:00	292秒	微信	N/A	111.72.132.186(江西-宜春)	2	1	2	1	2	2	1	4	1	1	1	2	2	2	2	3	2	1	2	1	2	2	1	2	2	2	2	1	2	4	5	4	3	2	3	5	5	5	5	5	5	5	5	5
459	2025/5/17 18:01:01	191秒	微信	N/A	125.87.92.64(重庆-重庆)	1	1	4	1	1	3	1	2	2	2	1	4	2	1	2	2	1	1	2	1	2	1	2	1	3	5	3	4	1	5	2	4	4	5	5	5	4	4	4	5	4	5	5	4
324	2025/5/17 17:51:19	228秒	微信	N/A	180.105.234.213(江苏-连云港)	2	1	2	4	1	5	1	3	1	1	2	3	2	3	2	1	1	3	3	2	2	1	4	2	5	1	5	2	3	3	5	4	4	4	5	4	5	4	4	2	1	3	1	4
374	2025/5/17 17:54:20	210秒	微信	N/A	125.87.82.82(重庆-重庆)	2	2	6	2	4	3	2	2	2	4	1	1	2	2	4	1	5	4	4	3	2	1	1	3	4	4	1	1	3	5	4	5	5	2	5	5	5	2	5	2	3	2	4	4
30	2025/5/17 17:32:35	199秒	微信	N/A	121.235.206.10(江苏-无锡)	1	1	4	4	4	5	4	5	5	2	4	3	4	4	1	1	1	1	1	2	1	2	3	3	5	4	3	3	5	4	4	4	5	5	4	5	3	5	3	3	1	4	1	1
631	2025/5/17 18:12:00	243秒	微信	N/A	117.26.229.15(福建-莆田)	2	1	3	3	2	4	4	4	3	5	4	5	3	4	4	5	5	4	5	3	3	3	5	1	3	2	3	4	5	3	5	4	5	5	5	5	2	4	4	4	5	5	4	2
995	2025/5/17 18:58:02	218秒	微信	N/A	122.230.57.72(浙江-湖州)	1	1	2	3	2	1	1	3	2	2	1	2	1	2	3	1	1	3	3	1	1	2	1	1	1	2	2	2	1	4	5	4	4	4	4	5	4	4	4	5	4	3	4	5
1009	2025/5/17 19:00:18	203秒	微信	N/A	123.189.112.236(辽宁-鞍山)	1	2	7	1	1	2	2	2	3	2	2	2	2	1	2	2	2	1	2	2	2	2	1	1	2	1	2	1	2	5	5	4	5	5	4	3	4	4	5	4	2	4	4	3
663	2025/5/17 18:15:24	299秒	微信	N/A	114.232.125.77(江苏-南通)	1	1	1	1	4	1	3	1	4	2	2	1	1	2	2	3	1	2	2	2	2	2	2	2	1	1	2	1	1	3	1	1	2	2	2	2	2	2	3	2	5	3	3	4
621	2025/5/17 18:11:11	214秒	微信	N/A	183.141.251.120(浙江-嘉兴)	1	2	5	3	1	3	3	2	1	2	1	1	3	3	2	5	1	1	1	1	3	1	1	1	2	1	2	1	2	2	5	2	1	4	1	1	2	3	2	4	5	5	5	5
117	2025/5/17 17:38:05	265秒	微信	N/A	123.189.114.229(辽宁-鞍山)	1	1	4	4	2	4	2	1	3	1	1	2	3	3	2	5	4	1	2	1	2	2	1	1	2	1	2	2	4	4	2	1	3	3	3	3	4	2	4	5	3	5	5	1
639	2025/5/17 18:12:49	182秒	微信	N/A	27.152.220.203(福建-泉州)	2	1	3	4	2	2	1	4	2	1	2	2	3	2	5	2	3	1	2	1	4	1	3	2	3	1	1	1	3	2	3	1	1	1	2	2	2	3	1	2	1	2	4	5
872	2025/5/17 18:36:38	239秒	微信	N/A	117.26.192.11(福建-莆田)	2	1	2	1	1	1	1	1	2	3	3	1	1	1	1	1	1	2	1	1	4	4	4	5	2	3	4	5	5	1	2	1	2	1	4	2	2	4	2	1	2	4	4	2
391	2025/5/17 17:55:10	219秒	微信	N/A	49.70.190.138(江苏-镇江)	2	1	3	3	5	5	2	2	2	3	4	1	5	3	5	4	1	3	3	1	3	5	5	2	2	1	2	1	1	1	4	3	4	2	4	3	2	4	1	1	5	1	3	3
645	2025/5/17 18:13:28	288秒	微信	N/A	123.189.115.207(辽宁-鞍山)	2	2	4	1	2	1	1	5	5	3	4	4	4	4	5	3	2	4	4	5	3	4	5	1	3	1	2	5	1	5	4	4	4	3	2	4	3	1	2	4	5	4	4	5
495	2025/5/17 18:03:15	247秒	微信	N/A	125.78.228.93(福建-莆田)	1	1	1	5	4	3	4	3	2	5	5	4	4	2	2	4	5	2	3	1	1	5	5	5	5	4	4	5	5	4	4	4	2	3	4	4	5	4	2	5	4	5	4	5
375	2025/5/17 17:54:22	296秒	微信	N/A	202.101.213.61(江西-抚州)	1	1	1	5	5	4	4	4	4	5	5	5	2	5	5	4	4	5	5	4	4	5	4	5	5	4	4	4	4	4	4	4	4	3	4	2	5	4	4	2	3	5	1	5
422	2025/5/17 17:58:10	278秒	微信	N/A	114.229.32.67(江苏-镇江)	1	2	5	2	1	2	3	1	2	4	1	4	4	2	1	2	4	2	5	5	2	4	4	4	4	5	5	5	5	1	2	2	1	1	2	1	1	1	3	4	2	3	1	1
222	2025/5/17 17:44:46	198秒	微信	N/A	115.208.88.148(浙江-湖州)	2	2	5	4	4	5	3	3	5	4	4	5	3	4	2	5	4	5	4	4	4	4	3	3	2	3	3	1	2	1	2	2	1	2	2	2	1	1	3	5	4	4	5	4
223	2025/5/17 17:44:46	207秒	微信	N/A	125.87.92.77(重庆-重庆)	2	1	2	3	5	5	5	5	5	4	5	4	5	2	2	4	2	2	2	3	4	4	4	4	5	4	4	5	5	1	1	2	1	2	2	4	1	2	4	4	5	5	5	5
537	2025/5/17 18:05:57	210秒	微信	N/A	220.190.43.249(浙江-温州)	1	1	2	5	5	3	4	4	5	4	4	4	5	4	4	3	4	2	4	4	5	4	3	4	4	5	4	3	5	4	3	2	2	2	1	1	2	2	3	5	4	4	4	1
915	2025/5/17 18:42:28	251秒	微信	N/A	123.189.113.38(辽宁-鞍山)	1	2	7	5	5	5	4	4	5	3	4	5	4	5	3	4	4	5	5	4	3	5	4	4	5	5	5	2	4	2	4	4	5	4	4	5	4	4	4	5	3	4	5	3
352	2025/5/17 17:53:01	221秒	微信	N/A	180.140.47.206(广西-桂林)	1	1	2	5	5	4	4	4	4	5	5	5	2	4	5	4	4	4	5	4	5	4	4	4	4	4	5	5	4	2	5	5	5	4	5	4	5	5	5	5	5	4	2	1
704	2025/5/17 18:18:55	302秒	微信	N/A	218.87.205.24(江西-抚州)	2	2	6	4	5	5	5	2	4	5	5	5	4	5	4	4	4	4	5	5	5	5	4	4	4	5	5	4	4	5	5	3	5	4	5	5	5	5	5	4	3	4	4	5
693	2025/5/17 18:18:03	268秒	微信	N/A	125.87.82.115(重庆-重庆)	2	2	6	3	5	5	5	3	5	5	5	3	4	5	4	5	4	5	4	5	5	4	4	5	5	4	5	4	5	4	5	5	5	5	4	5	4	5	4	4	5	5	5	1
597	2025/5/17 18:09:37	253秒	微信	N/A	118.113.245.77(四川-成都)	2	2	5	4	2	1	3	5	3	2	5	1	3	3	3	4	3	3	2	5	1	2	2	3	1	1	1	3	1	4	2	4	4	4	4	3	2	2	4	5	4	5	2	2
956	2025/5/17 18:49:55	297秒	微信	N/A	111.72.193.244(江西-鹰潭)	1	2	7	5	1	4	2	1	2	1	4	3	1	3	4	1	2	2	1	1	1	3	3	4	4	5	3	4	4	4	4	4	5	4	2	5	5	4	4	2	4	5	3	3
965	2025/5/17 18:52:11	262秒	微信	N/A	183.142.38.150(浙江-湖州)	1	2	5	3	4	5	3	5	4	4	3	3	5	1	1	2	1	3	1	1	1	2	4	5	2	5	4	4	3	4	5	4	5	3	5	5	5	4	3	5	5	5	3	3
617	2025/5/17 18:11:05	262秒	微信	N/A	115.208.69.78(浙江-湖州)	1	2	6	2	4	5	1	1	1	4	2	2	4	4	4	5	1	4	2	1	3	1	4	5	5	4	4	5	4	2	5	5	5	4	5	4	4	4	5	2	1	2	2	5
596	2025/5/17 18:09:36	278秒	微信	N/A	110.82.165.174(福建-莆田)	1	1	2	4	3	4	5	3	3	4	4	5	4	5	4	5	4	2	5	4	4	4	5	3	3	4	4	3	4	4	4	2	1	2	3	4	5	4	1	4	4	4	4	4
884	2025/5/17 18:38:10	235秒	微信	N/A	171.41.130.20(湖北-荆门)	1	2	4	5	3	5	4	5	4	4	5	4	5	4	5	3	5	4	3	4	4	5	4	2	5	5	5	4	4	4	5	5	3	2	4	2	3	4	4	5	4	5	4	3
640	2025/5/17 18:13:04	316秒	微信	N/A	182.132.25.229(四川-德阳)	2	2	7	2	1	5	1	1	1	4	4	4	1	1	2	2	2	1	2	2	2	4	4	5	4	4	5	3	3	4	4	5	2	5	5	4	4	3	4	3	1	2	2	5
787	2025/5/17 18:26:41	252秒	微信	N/A	144.255.40.186(山东-烟台)	1	2	5	3	1	2	2	5	1	2	4	3	3	2	4	3	4	2	3	3	3	1	5	5	5	5	4	4	3	4	4	2	5	5	2	5	4	5	4	1	2	5	4	1
816	2025/5/17 18:29:59	224秒	微信	N/A	118.113.244.119(四川-成都)	2	1	1	5	3	4	5	4	4	2	5	4	4	2	4	2	5	4	5	5	5	4	1	5	4	1	1	4	1	4	4	4	4	4	4	5	4	4	4	3	5	4	4	5
205	2025/5/17 17:43:42	270秒	微信	N/A	121.205.222.215(福建-莆田)	1	1	2	3	2	1	3	2	2	4	5	3	3	5	5	5	5	3	5	4	5	4	5	4	4	5	4	5	5	5	4	2	5	5	3	4	5	5	4	5	4	4	4	1
940	2025/5/17 18:47:20	198秒	微信	N/A	110.88.30.42(福建-三明)	1	1	4	5	4	4	3	5	3	5	4	4	4	4	3	5	5	5	5	4	2	4	5	3	5	4	5	4	4	2	1	1	1	1	4	5	4	5	3	5	5	5	5	2
653	2025/5/17 18:14:22	234秒	微信	N/A	180.127.139.208(江苏-连云港)	1	2	6	3	5	5	5	4	4	4	4	5	5	3	5	4	3	5	4	5	4	5	4	3	5	4	5	4	5	3	3	4	4	4	4	5	3	5	2	5	5	3	4	3
28	2025/5/17 17:32:17	224秒	微信	N/A	180.127.139.205(江苏-连云港)	1	1	2	4	5	5	3	5	3	4	4	5	4	4	5	3	5	4	4	4	5	5	5	4	5	4	4	5	5	4	4	5	4	4	5	3	4	4	4	2	2	2	2	2
960	2025/5/17 18:50:57	246秒	微信	N/A	118.113.245.125(四川-成都)	2	2	4	4	5	5	5	5	5	4	3	5	4	5	5	5	4	5	4	4	4	5	5	5	4	4	4	5	5	4	3	5	4	3	4	5	5	4	5	4	5	5	3	3
654	2025/5/17 18:14:28	241秒	微信	N/A	117.92.234.71(江苏-连云港)	2	2	5	1	2	1	1	2	2	2	1	2	1	4	4	4	3	3	5	5	3	4	1	1	3	4	4	3	1	4	5	5	4	5	4	4	5	4	3	5	4	5	5	5
887	2025/5/17 18:38:29	196秒	微信	N/A	110.82.143.173(福建-莆田)	1	2	4	4	5	2	2	3	3	1	4	1	4	2	2	1	4	4	4	3	2	5	1	1	2	1	3	2	4	5	4	3	4	5	4	4	5	4	5	5	4	5	4	4
87	2025/5/17 17:36:06	266秒	微信	N/A	118.112.195.232(四川-成都)	1	1	2	1	1	2	3	1	5	5	4	2	4	4	3	4	4	3	4	4	4	4	2	1	1	2	4	4	4	4	2	5	2	2	3	3	4	2	2	3	3	4	5	3
507	2025/5/17 18:04:07	270秒	微信	N/A	125.109.57.40(浙江-温州)	2	2	6	3	5	5	5	4	3	2	3	5	4	4	5	4	4	1	2	1	1	5	5	1	2	5	1	1	2	4	4	4	4	4	2	4	4	4	4	4	5	3	3	1
978	2025/5/17 18:54:46	286秒	微信	N/A	110.81.48.212(福建-泉州)	1	1	2	5	2	4	1	2	1	1	5	5	4	4	4	4	5	2	4	5	3	5	4	1	3	2	4	4	4	3	5	4	4	4	5	2	4	4	5	5	4	2	3	1
783	2025/5/17 18:26:16	183秒	微信	N/A	118.113.247.25(四川-成都)	1	2	4	4	5	5	5	4	4	5	5	4	5	4	4	3	5	5	5	4	5	4	4	4	4	3	5	4	5	5	3	4	4	5	3	4	4	3	5	3	1	1	4	3
705	2025/5/17 18:18:59	196秒	微信	N/A	111.72.199.201(江西-鹰潭)	1	1	3	2	5	2	5	4	4	3	2	3	4	4	1	5	4	4	2	1	1	2	2	1	2	1	3	2	1	4	3	4	5	5	4	5	5	4	2	4	5	1	3	4
518	2025/5/17 18:04:38	198秒	微信	N/A	110.82.166.81(福建-莆田)	2	1	4	2	5	5	4	4	3	2	1	1	1	5	4	4	5	4	5	4	5	5	5	5	5	3	5	4	5	4	5	4	5	5	5	4	5	4	5	4	2	5	3	5
593	2025/5/17 18:09:23	253秒	微信	N/A	123.189.115.181(辽宁-鞍山)	2	1	4	3	4	4	5	4	4	4	5	4	5	3	4	5	5	4	3	3	4	5	5	4	5	4	2	4	2	4	4	5	5	4	5	2	5	5	2	4	4	4	4	4
22	2025/5/17 17:31:56	239秒	微信	N/A	61.154.88.99(福建-三明)	2	2	5	5	3	5	4	4	5	3	4	4	5	3	3	4	3	5	5	3	5	4	5	2	4	5	4	5	2	3	4	4	3	5	3	5	5	5	4	2	2	2	1	4
777	2025/5/17 18:25:52	308秒	微信	N/A	120.43.35.145(福建-宁德)	1	2	7	5	4	4	4	4	3	5	4	4	4	4	4	5	3	5	5	5	4	4	5	4	3	5	5	4	4	4	4	5	5	4	4	5	4	4	4	1	1	1	1	5
221	2025/5/17 17:44:42	291秒	微信	N/A	223.221.206.9(青海-黄南)	1	2	4	5	5	5	4	4	5	4	4	5	4	5	5	5	4	4	5	3	5	5	5	5	5	5	5	4	4	5	4	5	4	5	4	4	5	4	4	5	1	2	2	4
445	2025/5/17 17:59:54	242秒	微信	N/A	125.87.94.104(重庆-重庆)	1	2	7	4	5	4	4	5	4	3	4	5	3	4	4	4	4	5	4	4	4	3	3	3	4	4	4	4	4	4	4	5	3	5	5	3	3	4	5	1	1	1	3	4
641	2025/5/17 18:13:06	211秒	微信	N/A	220.190.49.220(浙江-温州)	2	1	3	5	3	5	5	4	2	5	4	4	5	5	5	4	4	4	4	3	5	4	4	4	5	5	4	3	4	5	5	5	5	5	5	4	4	4	4	4	4	1	3	5
231	2025/5/17 17:45:22	183秒	微信	N/A	222.212.224.177(四川-成都)	1	1	1	4	4	5	5	4	4	3	5	5	4	5	4	5	4	4	5	5	4	4	4	5	5	4	5	5	4	4	4	5	3	4	4	4	4	4	5	3	4	5	5	2
118	2025/5/17 17:38:09	292秒	微信	N/A	118.112.194.223(四川-成都)	1	1	3	4	5	4	5	3	2	4	5	4	5	4	4	5	4	4	4	3	5	5	5	3	5	4	4	4	4	2	4	4	5	3	4	5	4	5	5	2	4	4	4	4
232	2025/5/17 17:45:30	263秒	微信	N/A	106.111.232.87(江苏-镇江)	1	2	6	5	4	4	4	4	5	4	4	5	4	3	4	4	4	4	4	5	4	5	3	5	4	4	4	5	4	5	4	4	4	4	5	4	4	5	4	1	4	2	1	5
958	2025/5/17 18:50:14	279秒	微信	N/A	59.58.105.98(福建-莆田)	2	2	6	5	5	5	4	2	5	4	4	5	5	2	5	4	4	4	5	5	4	4	4	4	3	4	4	5	5	5	4	5	4	5	5	5	4	4	5	5	5	4	5	5
848	2025/5/17 18:33:12	183秒	微信	N/A	125.123.71.118(浙江-嘉兴)	2	2	6	4	5	4	5	5	3	5	5	5	4	4	5	4	3	5	5	2	4	5	4	4	4	5	4	4	4	4	4	5	4	4	4	4	4	5	4	3	2	5	5	5
979	2025/5/17 18:54:46	279秒	微信	N/A	123.189.114.45(辽宁-鞍山)	2	2	7	4	5	4	5	5	4	5	4	3	5	4	4	5	4	4	4	5	4	4	4	5	5	2	4	5	5	4	3	5	4	4	4	3	5	5	5	3	4	5	4	2
508	2025/5/17 18:04:07	191秒	微信	N/A	180.127.139.211(江苏-连云港)	1	1	1	5	4	5	5	3	4	4	5	4	4	5	4	4	4	4	4	4	2	5	5	5	5	5	3	4	2	4	4	4	4	4	4	4	5	5	4	5	5	1	4	1
529	2025/5/17 18:05:32	188秒	微信	N/A	123.189.114.49(辽宁-鞍山)	2	2	6	5	5	4	5	5	4	4	4	4	4	4	5	5	5	5	4	4	4	5	5	4	2	4	5	4	5	3	5	4	4	4	4	5	5	5	5	4	3	5	4	3
883	2025/5/17 18:38:00	286秒	微信	N/A	49.70.190.175(江苏-镇江)	1	2	5	5	4	4	5	5	3	2	4	5	4	4	5	4	3	4	5	4	3	5	4	4	3	4	5	4	4	5	4	5	4	4	5	4	3	5	5	4	5	4	5	4
713	2025/5/17 18:19:50	231秒	微信	N/A	111.72.133.100(江西-宜春)	1	2	6	3	4	4	5	4	4	3	4	5	4	4	5	3	2	4	4	5	4	5	4	3	4	4	3	4	4	4	3	5	4	5	4	5	5	5	4	4	3	5	5	5
357	2025/5/17 17:53:17	228秒	微信	N/A	125.87.90.64(重庆-重庆)	1	1	1	4	4	5	4	4	4	5	5	4	4	5	5	5	5	4	2	4	4	3	4	5	4	3	4	4	4	4	1	1	1	4	2	2	1	1	3	2	5	2	1	2
125	2025/5/17 17:38:32	264秒	微信	N/A	218.87.205.188(江西-抚州)	1	1	2	4	4	4	4	3	4	3	5	5	5	4	4	3	5	4	5	5	4	5	5	4	4	4	4	5	4	3	4	1	2	2	1	2	2	2	2	4	3	5	4	4
421	2025/5/17 17:58:04	274秒	微信	N/A	123.189.113.215(辽宁-鞍山)	1	2	5	3	4	3	5	5	4	5	4	5	4	4	5	5	3	4	5	5	5	4	4	4	3	4	4	4	5	2	2	1	2	3	1	1	1	4	4	5	4	5	5	5
619	2025/5/17 18:11:07	188秒	微信	N/A	220.190.55.218(浙江-温州)	1	1	2	4	5	3	4	4	4	4	5	5	5	4	5	4	5	4	4	5	5	5	4	4	2	5	4	5	5	2	3	1	1	5	4	3	3	1	2	4	5	4	2	5
210	2025/5/17 17:43:51	212秒	微信	N/A	111.72.131.247(江西-宜春)	1	1	4	2	2	2	1	2	2	1	1	2	2	1	2	2	2	3	1	3	1	2	2	1	2	1	3	2	1	4	3	1	2	1	3	3	3	2	4	1	2	1	4	4
170	2025/5/17 17:41:27	211秒	微信	N/A	123.189.113.28(辽宁-鞍山)	2	2	7	2	2	1	2	2	3	1	2	2	2	1	2	2	1	1	4	1	2	1	4	5	4	3	5	3	3	1	1	4	3	2	1	4	5	2	5	3	3	3	2	4
440	2025/5/17 17:59:47	279秒	微信	N/A	123.189.112.11(辽宁-鞍山)	1	1	3	4	3	1	1	4	2	4	4	5	1	1	1	1	4	5	3	1	4	2	2	1	2	2	1	2	1	2	4	1	4	5	3	4	1	3	2	5	5	4	4	4
325	2025/5/17 17:51:27	279秒	微信	N/A	125.87.84.206(重庆-重庆)	2	1	4	2	1	2	3	1	1	3	2	1	2	4	4	4	5	5	5	2	4	4	1	1	5	4	2	1	5	4	3	4	5	2	4	5	4	4	4	5	4	5	3	1
898	2025/5/17 18:40:02	228秒	微信	N/A	220.190.43.231(浙江-温州)	1	2	5	3	5	3	5	3	4	4	5	5	4	3	2	2	3	5	5	2	4	5	2	4	4	2	2	4	4	1	2	1	2	1	1	2	1	1	2	5	1	2	2	5
539	2025/5/17 18:06:09	230秒	微信	N/A	125.123.139.102(浙江-嘉兴)	1	1	1	1	1	2	3	2	1	2	2	1	2	3	2	1	2	1	2	1	4	2	1	1	1	2	2	2	2	2	2	2	2	1	2	1	2	1	2	5	4	4	2	4
550	2025/5/17 18:06:50	217秒	微信	N/A	115.208.165.32(浙江-湖州)	2	2	7	1	2	2	2	2	2	2	1	2	2	1	1	3	2	2	1	1	2	1	2	3	4	2	2	1	2	1	3	3	1	3	4	2	2	3	4	4	3	5	5	4
297	2025/5/17 17:49:37	277秒	微信	N/A	125.78.219.52(福建-莆田)	1	1	2	1	3	2	3	2	1	3	4	1	2	4	2	3	1	4	1	1	4	2	2	1	4	1	2	1	2	1	4	4	1	4	5	2	5	3	2	4	1	4	2	2
784	2025/5/17 18:26:18	245秒	微信	N/A	114.232.2.22(江苏-南通)	2	2	4	5	5	3	5	3	4	4	4	4	2	4	1	5	2	2	3	2	3	5	3	1	4	3	2	3	1	1	3	2	3	1	2	1	1	1	3	1	4	2	5	3
664	2025/5/17 18:15:29	241秒	微信	N/A	117.90.216.143(江苏-镇江)	1	2	6	4	4	4	5	4	5	3	4	5	3	3	5	4	4	4	4	3	4	5	4	2	2	4	5	5	5	4	1	1	1	1	2	1	3	3	2	4	3	5	4	3
683	2025/5/17 18:17:04	282秒	微信	N/A	220.190.49.232(浙江-温州)	1	1	1	5	4	4	4	5	5	5	4	5	5	5	5	4	5	4	3	5	4	3	4	4	4	3	5	5	5	1	2	2	3	2	3	2	3	1	1	5	4	4	5	4
994	2025/5/17 18:58:01	244秒	微信	N/A	125.87.93.121(重庆-重庆)	1	2	7	5	5	3	5	4	5	5	4	5	4	5	5	4	5	4	5	4	4	5	4	5	4	5	5	2	4	3	3	3	3	2	3	5	5	1	2	4	5	4	4	5
652	2025/5/17 18:14:15	292秒	微信	N/A	114.232.204.67(江苏-南通)	1	2	4	5	4	4	4	5	5	5	3	5	5	5	5	5	4	5	5	4	5	3	5	5	5	4	4	5	5	1	4	4	3	5	2	3	3	5	1	1	3	5	1	3
576	2025/5/17 18:08:30	254秒	微信	N/A	125.87.87.163(重庆-重庆)	2	1	2	4	4	4	3	3	4	5	5	4	3	4	5	5	2	3	4	3	4	2	2	2	5	4	3	3	3	4	5	3	4	4	5	5	2	4	2	4	5	4	4	1
807	2025/5/17 18:29:14	261秒	微信	N/A	180.105.53.73(江苏-连云港)	1	1	2	4	5	4	4	5	4	4	3	4	5	4	4	4	5	2	5	5	5	4	5	4	4	4	4	5	3	4	2	4	4	5	4	4	4	4	5	5	5	5	5	4
386	2025/5/17 17:54:59	233秒	微信	N/A	218.66.247.198(福建-宁德)	1	2	6	5	4	4	4	5	5	4	3	3	5	3	4	5	5	3	4	5	5	4	4	4	5	4	5	3	5	5	4	5	5	4	4	4	4	2	5	2	5	4	1	5
822	2025/5/17 18:30:20	210秒	微信	N/A	118.113.245.250(四川-成都)	1	1	3	4	1	4	2	1	3	3	3	4	1	5	2	5	3	4	5	4	2	2	4	1	2	3	3	1	3	4	4	4	4	5	5	5	3	4	4	4	4	3	4	4
891	2025/5/17 18:39:04	205秒	微信	N/A	117.24.176.180(福建-泉州)	1	1	3	1	1	5	4	2	5	5	5	3	2	2	4	4	4	5	3	4	5	5	4	3	2	3	3	1	3	4	5	5	4	5	5	3	5	2	4	4	5	5	4	5
351	2025/5/17 17:53:00	240秒	微信	N/A	180.140.47.124(广西-桂林)	1	2	4	4	3	3	3	4	4	4	4	4	4	5	2	3	1	2	2	3	1	4	5	5	5	4	4	4	5	5	5	5	3	3	5	5	5	4	4	5	4	4	2	4
516	2025/5/17 18:04:33	237秒	微信	N/A	125.87.87.53(重庆-重庆)	2	2	5	2	4	3	5	4	5	4	5	2	4	4	5	4	4	4	5	5	2	3	2	4	1	4	1	4	4	5	5	4	5	4	4	4	5	5	4	3	2	4	4	4
330	2025/5/17 17:51:40	282秒	微信	N/A	117.26.194.180(福建-莆田)	1	2	7	2	4	4	3	5	4	5	4	5	4	4	4	4	5	4	5	3	4	3	4	5	4	2	3	3	5	4	4	4	4	4	5	5	2	4	5	4	4	5	3	3
530	2025/5/17 18:05:32	284秒	微信	N/A	118.113.247.87(四川-成都)	2	1	2	5	4	5	4	5	5	5	4	3	4	4	4	5	3	3	5	4	5	4	5	5	5	2	4	5	3	2	3	3	5	4	5	5	5	5	5	4	5	4	5	5
1014	2025/5/17 19:01:15	290秒	微信	N/A	180.105.129.147(江苏-连云港)	1	1	3	4	4	4	3	5	4	4	4	5	5	4	5	4	5	5	4	4	3	5	4	4	5	2	5	5	5	4	5	5	4	5	4	4	5	5	5	4	5	3	5	5
398	2025/5/17 17:55:53	281秒	微信	N/A	117.27.114.17(福建-三明)	1	2	4	5	4	3	5	4	5	4	5	5	5	5	3	5	5	3	5	5	4	5	4	5	4	4	5	4	5	2	3	1	1	2	4	5	3	3	2	4	5	1	1	3
778	2025/5/17 18:25:52	288秒	微信	N/A	58.52.165.246(湖北-咸宁)	2	1	3	5	4	5	4	3	4	4	5	3	4	2	5	4	3	5	5	4	4	4	4	4	3	4	5	4	2	4	2	5	2	2	4	2	2	2	3	5	5	3	4	5
181	2025/5/17 17:42:13	182秒	微信	N/A	180.105.53.83(江苏-连云港)	1	1	2	4	5	4	3	4	5	3	5	5	5	4	4	4	5	4	4	4	4	4	5	4	4	3	2	4	5	3	4	5	1	5	2	3	4	1	2	3	5	5	2	3
489	2025/5/17 18:02:50	263秒	微信	N/A	218.90.91.159(江苏-无锡)	2	2	6	5	5	4	5	4	2	5	4	5	4	4	4	4	5	4	5	4	4	3	4	4	2	5	5	5	4	5	2	5	4	5	2	3	3	1	2	5	4	4	4	3
307	2025/5/17 17:50:12	285秒	微信	N/A	180.105.129.148(江苏-连云港)	2	1	1	4	4	4	4	4	4	5	4	5	4	5	4	3	5	4	4	5	5	4	4	3	4	5	5	4	3	4	2	5	2	5	4	5	3	5	2	4	3	4	5	1
583	2025/5/17 18:08:54	208秒	微信	N/A	220.190.43.243(浙江-温州)	1	1	1	5	4	5	5	4	4	3	4	5	5	3	4	5	5	5	5	4	4	5	5	4	4	4	5	3	5	5	4	5	4	4	4	3	4	4	2	1	5	1	1	4
873	2025/5/17 18:36:50	262秒	微信	N/A	110.87.251.197(福建-三明)	2	1	4	2	4	3	3	2	4	3	2	1	4	5	3	2	2	3	5	5	5	5	1	1	3	5	4	1	4	4	4	5	3	4	5	4	5	3	5	2	2	3	1	3
319	2025/5/17 17:51:02	203秒	微信	N/A	123.190.161.245(辽宁-辽阳)	2	1	4	4	4	4	4	5	4	5	4	4	3	4	4	5	4	4	4	4	3	3	4	5	3	4	3	3	3	1	5	3	5	1	1	1	1	5	4	4	4	5	5	2
599	2025/5/17 18:09:40	269秒	微信	N/A	110.86.174.68(福建-莆田)	1	2	6	5	4	5	4	3	4	5	4	5	4	4	4	4	4	5	5	5	4	4	4	4	5	3	5	3	5	1	4	1	2	2	5	2	3	5	4	5	4	5	5	1
520	2025/5/17 18:04:53	248秒	微信	N/A	118.113.247.189(四川-成都)	1	2	6	2	1	1	1	2	2	2	2	1	2	3	4	5	5	2	4	5	4	4	4	4	3	4	3	5	3	5	4	3	3	2	1	2	5	4	1	5	5	4	3	3
707	2025/5/17 18:19:13	244秒	微信	N/A	115.207.243.55(浙江-湖州)	2	1	3	5	2	4	3	4	4	3	4	5	4	4	3	2	2	5	2	5	4	3	3	1	1	4	4	1	1	3	2	5	4	5	4	4	4	4	2	4	5	4	4	2
50	2025/5/17 17:33:48	232秒	微信	N/A	111.132.17.233(北京-北京)	1	2	7	3	4	4	3	2	4	5	4	4	4	3	4	2	4	4	2	2	3	5	4	1	1	3	2	5	4	3	5	5	4	4	5	4	3	4	2	3	5	4	1	4
982	2025/5/17 18:55:12	238秒	微信	N/A	118.113.246.69(四川-成都)	1	1	2	4	5	4	5	5	5	3	4	3	5	5	3	3	4	2	5	4	5	4	5	4	4	5	2	4	4	4	5	5	4	5	4	5	5	5	3	2	5	1	3	3
945	2025/5/17 18:48:05	196秒	微信	N/A	111.72.195.245(江西-鹰潭)	2	2	4	4	5	5	5	4	3	5	4	4	4	4	4	4	4	4	5	5	4	3	2	4	3	5	5	4	4	5	5	5	5	4	4	5	4	5	5	3	5	4	3	1
692	2025/5/17 18:17:47	299秒	微信	N/A	183.141.52.212(浙江-嘉兴)	1	1	2	2	5	4	4	5	5	4	4	4	5	3	4	5	4	5	4	4	5	4	4	2	5	5	5	5	3	1	4	2	1	2	2	3	3	5	3	5	5	2	2	1
691	2025/5/17 18:17:45	198秒	微信	N/A	125.87.93.188(重庆-重庆)	1	2	5	4	4	4	5	5	5	4	4	5	4	5	5	4	4	3	5	4	3	4	4	5	3	4	5	4	4	1	4	4	1	1	2	4	5	2	3	1	5	5	4	5
206	2025/5/17 17:43:42	246秒	微信	N/A	117.26.88.122(福建-莆田)	1	1	3	4	4	5	5	3	5	4	5	4	5	4	5	5	3	4	5	5	5	5	5	2	5	5	2	5	5	3	4	1	5	3	3	4	4	3	2	4	1	3	2	5
809	2025/5/17 18:29:27	186秒	微信	N/A	111.179.72.246(湖北-咸宁)	1	2	6	4	4	2	5	5	5	4	5	4	4	5	5	2	4	5	5	3	5	5	4	3	3	4	5	5	4	4	4	3	4	5	5	2	2	4	5	5	5	4	5	2
602	2025/5/17 18:09:59	207秒	微信	N/A	27.150.85.71(福建-三明)	2	1	3	5	5	5	4	3	5	4	5	4	3	3	4	4	5	4	5	2	5	5	5	5	5	2	4	5	4	2	4	4	4	4	5	4	4	5	3	3	5	5	5	5
820	2025/5/17 18:30:12	185秒	微信	N/A	114.229.32.115(江苏-镇江)	2	1	3	5	4	4	5	5	4	4	3	3	4	5	5	5	5	4	4	4	4	3	4	5	2	5	5	4	5	4	3	5	4	5	3	5	4	4	5	5	4	5	4	5
248	2025/5/17 17:46:34	365秒	微信	N/A	111.72.193.122(江西-鹰潭)	1	1	1	4	3	3	4	5	4	5	4	5	5	5	3	5	4	3	5	5	3	4	4	3	4	5	5	3	3	5	5	4	5	5	4	5	4	3	3	5	4	4	4	1
916	2025/5/17 18:42:30	279秒	微信	N/A	220.161.240.80(福建-宁德)	2	2	5	4	4	3	5	4	4	4	5	5	5	5	5	4	4	5	4	4	5	5	4	5	3	5	4	5	4	4	4	5	5	5	4	4	5	4	5	4	5	5	2	4
917	2025/5/17 18:42:38	196秒	微信	N/A	111.72.130.193(江西-宜春)	1	1	4	4	5	2	5	5	4	4	5	5	5	5	4	5	5	5	5	4	4	4	5	5	4	3	5	5	4	3	3	3	2	2	1	3	4	5	3	5	4	4	4	5
761	2025/5/17 18:24:28	244秒	微信	N/A	125.87.92.99(重庆-重庆)	1	2	7	4	5	4	5	5	4	4	4	5	5	5	4	5	4	5	4	5	5	4	5	3	5	4	4	5	4	3	5	3	4	2	3	4	5	1	4	5	4	3	5	5
764	2025/5/17 18:24:42	278秒	微信	N/A	125.87.87.134(重庆-重庆)	2	1	3	4	5	4	5	4	5	5	3	4	2	4	4	4	2	4	5	4	3	5	4	4	3	3	3	5	5	4	4	3	5	5	4	4	4	4	4	3	5	4	5	5
993	2025/5/17 18:57:38	232秒	微信	N/A	117.26.193.43(福建-莆田)	1	1	3	3	4	5	4	4	4	4	4	5	4	3	5	5	3	5	5	4	5	4	5	4	4	4	5	4	5	3	4	4	4	4	4	5	4	5	5	5	4	4	3	5
614	2025/5/17 18:10:50	270秒	微信	N/A	120.37.3.105(福建-泉州)	2	2	4	5	4	5	5	3	4	4	4	5	5	4	3	4	4	4	5	5	5	4	5	4	5	4	2	5	5	5	5	4	4	5	3	3	4	5	5	4	4	5	5	4
950	2025/5/17 18:48:50	272秒	微信	N/A	171.41.129.161(湖北-荆门)	1	2	7	4	4	3	2	1	3	1	2	1	4	3	1	4	1	2	5	5	1	2	1	2	2	1	4	1	2	3	5	4	5	2	5	5	5	5	5	5	4	4	2	2
52	2025/5/17 17:33:56	289秒	微信	N/A	116.22.49.211(广东-广州)	1	1	1	2	4	1	2	3	4	3	1	1	3	3	2	2	3	4	4	4	1	2	4	5	5	4	5	5	3	5	4	5	5	4	5	5	5	5	2	4	3	4	4	3
721	2025/5/17 18:20:36	296秒	微信	N/A	122.230.49.251(浙江-湖州)	1	2	6	4	2	5	4	3	4	5	5	3	4	5	4	4	2	4	2	5	4	2	5	1	3	1	3	3	3	4	4	4	4	5	4	4	4	4	5	4	5	5	5	4
533	2025/5/17 18:05:44	249秒	微信	N/A	140.250.149.127(山东-济南)	1	2	5	1	1	4	2	2	2	1	2	1	1	2	2	1	1	1	2	4	3	1	2	1	3	1	2	2	1	5	5	5	3	4	4	4	5	2	5	2	4	3	1	3
595	2025/5/17 18:09:34	196秒	微信	N/A	106.111.232.117(江苏-镇江)	2	1	3	1	1	2	2	1	1	4	2	3	2	2	1	2	1	3	1	3	4	1	1	1	3	1	3	3	1	4	4	4	4	5	4	4	4	5	5	4	3	4	4	4
395	2025/5/17 17:55:31	198秒	微信	N/A	123.189.114.182(辽宁-鞍山)	1	2	4	2	2	1	1	1	2	4	2	1	2	1	2	2	1	1	2	2	2	2	5	1	4	4	1	1	2	3	4	5	5	4	4	5	4	5	4	5	4	5	4	4
968	2025/5/17 18:52:24	245秒	微信	N/A	180.105.234.198(江苏-连云港)	2	1	1	3	2	1	4	2	2	2	3	3	2	2	4	1	1	1	1	1	3	1	2	3	4	2	1	2	3	5	4	5	4	5	5	5	4	4	5	5	4	4	4	3
870	2025/5/17 18:36:18	269秒	微信	N/A	58.52.153.15(湖北-咸宁)	2	2	4	1	1	1	3	2	3	1	1	5	4	1	4	1	2	4	1	1	3	4	1	1	1	4	4	3	1	4	5	5	5	5	4	5	5	3	4	4	5	5	5	5
296	2025/5/17 17:49:34	231秒	微信	N/A	182.132.25.101(四川-德阳)	2	1	3	1	2	1	2	2	1	1	1	4	2	2	3	1	2	2	2	2	2	1	2	1	3	1	2	1	3	4	4	5	4	5	5	4	5	5	5	4	2	4	5	1
980	2025/5/17 18:55:06	218秒	微信	N/A	123.189.114.57(辽宁-鞍山)	2	1	3	2	2	2	2	2	2	3	1	2	1	1	1	1	1	1	2	2	1	2	4	2	2	3	2	5	1	5	5	4	4	5	4	4	3	4	5	4	4	2	4	4
366	2025/5/17 17:53:50	228秒	微信	N/A	183.141.14.143(浙江-嘉兴)	2	1	3	1	4	2	1	2	1	2	4	2	4	1	1	5	2	2	2	5	3	1	3	3	2	3	2	2	1	3	3	5	4	5	5	5	4	5	5	3	4	4	5	5
1020	2025/5/17 19:02:27	190秒	微信	N/A	117.26.222.56(福建-莆田)	1	2	5	3	3	4	4	5	5	2	4	4	5	1	2	2	5	5	4	3	1	4	1	1	5	2	4	4	1	4	5	4	5	5	4	4	4	5	5	5	5	5	5	2
860	2025/5/17 18:35:01	255秒	微信	N/A	140.250.145.89(山东-济南)	1	1	4	1	3	1	4	2	5	1	4	1	3	4	5	5	4	4	4	5	5	5	3	5	5	3	5	5	5	4	2	5	4	5	4	5	4	5	4	5	4	4	4	5
251	2025/5/17 17:46:39	271秒	微信	N/A	125.87.89.121(重庆-重庆)	1	2	4	5	4	3	4	4	4	4	5	4	4	4	4	5	4	4	5	2	5	3	3	1	5	4	5	3	4	4	2	5	5	5	3	4	5	4	5	2	3	3	2	4
553	2025/5/17 18:07:03	257秒	微信	N/A	59.58.19.206(福建-宁德)	1	2	4	4	4	5	3	4	4	4	4	5	4	4	4	5	5	4	2	5	5	5	4	5	4	2	2	4	5	4	5	4	5	4	4	4	5	4	4	5	4	4	4	1
1021	2025/5/17 19:02:53	221秒	微信	N/A	27.156.198.156(福建-宁德)	2	2	6	4	5	4	3	4	4	5	5	5	4	4	4	4	4	4	4	5	4	4	3	5	4	4	5	5	3	5	4	4	5	4	3	5	4	5	4	4	4	4	3	3
733	2025/5/17 18:21:30	231秒	微信	N/A	125.87.80.229(重庆-重庆)	1	2	4	3	5	3	4	4	5	5	5	5	5	4	3	5	5	3	4	5	4	4	4	4	4	5	4	5	2	4	5	4	5	2	4	5	5	5	4	4	5	2	4	5
708	2025/5/17 18:19:16	281秒	微信	N/A	117.90.238.192(江苏-镇江)	1	1	1	1	3	5	5	5	1	3	4	1	3	4	1	4	1	2	2	3	5	4	2	1	4	2	5	1	3	1	3	3	2	1	1	1	4	4	4	5	2	2	3	4
718	2025/5/17 18:20:29	273秒	微信	N/A	220.190.44.115(浙江-温州)	1	1	2	5	3	5	4	4	3	5	5	4	4	3	5	5	5	5	3	3	5	4	5	5	4	4	4	4	5	2	2	3	2	5	1	1	2	5	4	5	5	5	2	2
731	2025/5/17 18:21:23	221秒	微信	N/A	125.87.92.88(重庆-重庆)	1	1	2	3	4	2	3	3	4	4	5	4	5	3	2	4	1	3	1	2	3	5	2	1	1	1	4	2	1	1	3	4	3	5	1	3	5	3	1	4	4	5	4	4
441	2025/5/17 17:59:48	298秒	微信	N/A	111.72.197.100(江西-鹰潭)	2	1	3	3	2	1	1	4	3	2	5	2	1	5	4	4	4	5	5	4	4	4	2	5	3	5	5	5	4	3	3	4	5	4	3	5	4	4	3	2	4	3	4	4
935	2025/5/17 18:46:10	213秒	微信	N/A	180.127.139.253(江苏-连云港)	1	1	4	1	3	2	5	5	3	4	1	1	5	5	5	5	4	5	4	4	5	4	4	5	5	5	5	4	5	3	2	5	4	4	4	4	4	5	4	5	4	4	5	2
452	2025/5/17 18:00:32	273秒	微信	N/A	117.90.219.126(江苏-镇江)	1	1	3	3	3	4	5	4	4	5	5	5	4	4	5	4	4	4	4	5	5	4	4	4	4	4	2	4	5	2	1	3	3	1	2	1	4	1	2	4	4	4	5	2
867	2025/5/17 18:36:08	233秒	微信	N/A	118.113.244.66(四川-成都)	1	1	2	4	4	3	4	5	4	4	4	5	2	5	4	5	3	1	1	2	2	2	4	2	1	2	1	3	4	1	3	2	5	2	5	2	2	3	2	3	5	4	2	4
26	2025/5/17 17:32:10	256秒	微信	N/A	111.72.129.65(江西-宜春)	1	2	4	4	5	2	4	5	4	5	3	5	4	4	4	4	5	3	4	5	4	5	4	4	4	4	4	5	4	4	5	5	5	2	1	2	3	2	1	3	4	4	5	4
946	2025/5/17 18:48:07	270秒	微信	N/A	117.42.94.141(江西-抚州)	1	1	2	5	5	4	4	3	4	5	3	5	5	5	4	3	3	4	5	4	5	4	5	4	3	5	5	4	3	5	4	1	1	5	2	2	4	4	3	4	5	5	5	3
895	2025/5/17 18:39:25	276秒	微信	N/A	123.189.113.108(辽宁-鞍山)	1	2	5	1	2	2	3	2	4	1	3	2	3	1	3	2	1	4	4	1	3	2	5	4	4	3	3	4	4	3	3	2	4	2	4	3	3	3	5	3	5	3	4	4
616	2025/5/17 18:11:01	295秒	微信	N/A	171.41.129.214(湖北-荆门)	1	1	3	4	4	2	2	4	4	4	3	4	1	5	2	3	2	3	3	2	5	2	2	1	3	1	3	3	1	4	4	4	1	1	2	5	3	5	3	3	4	4	5	4
534	2025/5/17 18:05:47	266秒	微信	N/A	111.72.197.105(江西-鹰潭)	2	1	1	1	1	2	2	1	3	2	2	2	1	5	4	2	4	4	5	4	3	5	3	3	4	5	4	4	3	4	2	2	5	4	4	2	3	5	4	4	5	4	5	4
208	2025/5/17 17:43:47	227秒	微信	N/A	27.150.162.220(福建-三明)	1	2	6	3	3	2	3	5	1	2	1	1	4	4	4	3	5	5	4	5	5	4	5	4	5	5	5	3	4	3	1	2	1	1	2	4	1	2	3	5	3	1	2	1
519	2025/5/17 18:04:42	215秒	微信	N/A	120.37.3.223(福建-泉州)	1	1	4	4	3	4	4	4	2	2	4	3	5	4	5	5	5	4	5	4	5	5	5	5	4	4	5	4	5	2	3	1	1	1	5	5	3	1	3	5	4	5	4	4
868	2025/5/17 18:36:12	244秒	微信	N/A	202.101.213.160(江西-抚州)	2	2	4	3	5	4	5	4	5	5	5	3	5	5	5	5	4	5	4	3	5	4	5	4	4	5	4	5	4	3	4	1	2	2	2	2	3	5	2	3	4	4	5	4
367	2025/5/17 17:53:51	230秒	微信	N/A	27.150.90.158(福建-三明)	2	2	4	5	5	5	5	4	4	5	5	4	5	4	5	5	5	5	5	5	5	4	5	4	5	5	5	5	5	4	4	5	4	5	4	5	3	4	3	2	1	3	5	5
317	2025/5/17 17:50:56	215秒	微信	N/A	125.87.90.129(重庆-重庆)	2	1	2	3	4	4	3	4	4	4	4	4	4	5	5	1	2	5	3	1	1	2	5	3	2	2	2	2	4	5	3	5	4	5	4	4	4	3	5	4	5	2	1	4
955	2025/5/17 18:49:47	263秒	微信	N/A	140.224.28.234(福建-泉州)	2	1	1	4	5	5	4	4	2	4	4	3	4	4	4	2	4	3	4	5	3	5	2	2	2	2	2	2	4	5	4	5	5	2	3	5	5	5	4	4	4	4	4	5
606	2025/5/17 18:10:16	218秒	微信	N/A	222.189.106.8(江苏-连云港)	1	1	2	5	4	4	3	4	4	5	5	3	4	2	3	5	2	5	4	5	3	1	3	3	3	2	3	3	4	5	5	4	3	5	4	4	5	5	4	5	5	4	3	4
949	2025/5/17 18:48:43	300秒	微信	N/A	110.86.173.158(福建-莆田)	1	1	3	4	5	4	4	4	5	2	4	4	4	5	4	4	4	5	4	3	4	4	3	3	2	4	3	1	2	3	5	4	4	5	5	5	4	5	4	4	5	4	4	4
521	2025/5/17 18:05:04	203秒	微信	N/A	49.70.190.86(江苏-镇江)	2	1	3	4	4	3	5	4	4	5	5	5	4	4	3	4	5	5	5	5	5	4	4	2	5	5	4	4	4	2	3	2	5	4	3	3	1	1	2	2	2	4	2	3
835	2025/5/17 18:31:41	302秒	微信	N/A	218.86.66.51(福建-宁德)	1	1	3	3	4	4	4	5	4	4	4	5	4	3	5	2	5	5	4	5	5	5	5	4	4	3	5	4	5	3	3	1	5	2	4	1	2	1	5	4	4	4	4	4
429	2025/5/17 17:58:48	287秒	微信	N/A	111.72.199.60(江西-鹰潭)	1	2	5	5	4	5	4	2	4	5	4	5	4	5	2	5	4	5	5	4	5	5	4	5	5	4	3	3	4	4	4	2	5	2	3	2	2	1	5	3	5	4	4	2
714	2025/5/17 18:20:02	213秒	微信	N/A	27.157.130.227(福建-三明)	1	1	3	4	4	5	5	4	4	3	4	4	4	3	5	4	4	3	3	3	5	4	3	2	4	4	4	5	4	5	4	3	4	4	4	4	4	5	3	1	5	4	1	5
387	2025/5/17 17:54:59	198秒	微信	N/A	59.58.43.8(福建-宁德)	1	2	6	5	4	4	2	5	5	4	3	5	4	4	5	4	5	4	4	4	4	4	4	5	3	5	5	4	4	3	5	5	5	3	5	4	3	3	4	5	5	4	3	5
833	2025/5/17 18:31:27	191秒	微信	N/A	117.90.217.144(江苏-镇江)	1	2	4	5	5	5	5	5	4	3	5	4	3	3	4	5	3	5	5	5	3	4	4	4	4	4	5	5	3	5	4	4	5	4	4	3	5	4	3	5	5	3	5	4
584	2025/5/17 18:08:56	192秒	微信	N/A	111.179.79.137(湖北-咸宁)	1	2	4	4	4	4	5	5	5	2	5	3	4	4	4	4	5	4	4	5	5	5	5	4	4	4	5	4	5	5	5	1	3	2	5	2	4	2	3	5	5	5	5	2
918	2025/5/17 18:42:54	297秒	微信	N/A	111.72.132.196(江西-宜春)	1	2	5	5	3	4	4	2	5	4	5	4	5	4	4	3	4	5	5	5	5	5	4	5	5	3	5	4	5	2	3	5	2	4	5	4	4	4	4	4	5	3	4	1
1023	2025/5/17 19:03:12	230秒	微信	N/A	58.52.142.16(湖北-咸宁)	1	2	6	5	4	2	5	5	5	3	4	5	4	4	4	2	5	5	5	2	5	4	5	3	3	3	5	5	4	5	4	5	4	5	4	5	3	4	4	4	5	4	5	4
88	2025/5/17 17:36:07	210秒	微信	N/A	118.112.194.226(四川-成都)	1	1	2	5	4	5	4	5	5	2	4	4	4	5	5	4	4	4	4	3	5	4	4	4	4	4	5	4	4	3	4	3	5	4	1	3	3	3	2	5	4	5	3	4
757	2025/5/17 18:24:14	299秒	微信	N/A	222.77.215.30(福建-莆田)	1	2	7	4	4	5	2	5	4	4	4	5	4	4	4	4	5	4	5	5	5	4	4	5	4	5	4	4	3	2	4	5	5	4	5	5	4	3	4	4	5	3	5	2
957	2025/5/17 18:50:05	213秒	微信	N/A	220.190.55.79(浙江-温州)	1	1	3	4	5	5	4	4	4	5	4	5	4	5	4	4	3	4	4	5	4	5	4	5	5	4	4	5	3	5	5	4	4	4	3	5	5	4	3	4	1	5	4	4
961	2025/5/17 18:50:58	261秒	微信	N/A	111.72.200.224(江西-鹰潭)	2	1	2	4	5	5	5	4	5	4	4	5	4	5	5	5	5	5	4	5	4	5	5	5	5	4	4	5	5	4	3	5	4	5	5	4	5	3	5	2	2	1	4	4
678	2025/5/17 18:16:38	251秒	微信	N/A	125.87.83.129(重庆-重庆)	2	1	4	4	4	4	4	5	5	5	4	4	2	3	3	3	5	5	5	5	4	5	4	5	4	4	4	3	5	4	5	5	4	4	5	3	4	4	5	4	3	4	5	2
161	2025/5/17 17:40:46	248秒	微信	N/A	59.59.215.174(福建-三明)	2	1	2	4	5	4	4	4	4	5	3	4	5	5	5	4	4	3	4	4	5	4	4	3	4	4	5	5	5	5	4	4	4	4	3	5	5	4	5	4	1	3	2	4
164	2025/5/17 17:40:59	191秒	微信	N/A	118.122.108.9(四川-成都)	1	2	7	3	4	4	5	5	4	5	5	5	5	5	4	4	2	4	4	4	5	5	4	4	4	4	5	4	4	4	3	5	5	5	4	5	4	4	5	2	5	5	3	3
524	2025/5/17 18:05:12	220秒	微信	N/A	111.72.128.66(江西-宜春)	2	1	2	4	4	5	5	5	3	4	5	5	4	2	5	4	4	5	5	4	5	4	4	4	5	4	4	4	5	4	4	1	2	4	2	4	1	5	2	5	4	4	2	5
171	2025/5/17 17:41:30	231秒	微信	N/A	111.72.132.119(江西-宜春)	1	2	6	2	4	3	2	3	1	2	1	2	3	3	4	1	1	1	5	2	3	2	2	1	2	1	3	5	2	5	4	4	4	4	4	2	3	5	5	5	5	4	4	1
178	2025/5/17 17:41:58	227秒	微信	N/A	59.59.214.203(福建-三明)	2	1	3	4	2	4	1	1	1	2	4	2	3	5	1	5	1	4	4	2	4	1	1	1	3	1	2	3	3	5	3	4	5	4	4	5	4	3	3	4	4	5	5	4
889	2025/5/17 18:38:49	269秒	微信	N/A	120.33.6.191(福建-泉州)	1	1	3	3	4	2	3	4	3	5	2	5	3	3	2	5	2	3	2	1	1	5	3	3	2	2	2	3	3	5	4	4	5	4	3	4	4	5	4	5	5	5	4	2
561	2025/5/17 18:07:36	274秒	微信	N/A	117.86.174.56(江苏-南通)	1	1	2	5	4	4	3	4	3	2	5	4	4	5	2	4	3	3	2	5	1	3	5	1	3	3	1	5	1	3	5	5	4	4	5	3	5	5	4	5	5	5	5	4
207	2025/5/17 17:43:47	207秒	微信	N/A	123.189.114.72(辽宁-鞍山)	2	2	7	2	1	4	1	3	5	3	4	2	5	1	4	5	2	2	4	3	1	1	5	5	5	5	4	4	5	4	5	5	5	4	5	4	4	5	4	1	2	3	1	5
240	2025/5/17 17:45:58	206秒	微信	N/A	125.87.87.223(重庆-重庆)	1	2	7	4	4	3	4	4	2	4	5	3	3	2	1	3	2	2	4	4	1	4	5	5	5	4	3	5	5	4	4	1	5	2	2	1	1	4	5	3	5	4	3	4
786	2025/5/17 18:26:36	190秒	微信	N/A	121.205.230.246(福建-莆田)	2	1	2	2	2	4	2	2	4	3	2	1	2	5	5	2	5	4	4	4	5	5	4	3	5	4	4	4	5	4	3	1	5	2	3	5	4	1	2	5	4	5	4	1
926	2025/5/17 18:44:08	262秒	微信	N/A	171.41.150.251(湖北-荆门)	2	1	4	2	2	1	3	3	2	2	1	1	2	2	1	1	1	1	3	2	1	5	1	2	2	1	1	2	2	4	5	3	4	4	4	5	3	4	5	5	5	1	3	3
862	2025/5/17 18:35:23	250秒	微信	N/A	122.230.59.105(浙江-湖州)	1	2	7	2	1	3	1	2	2	2	2	2	1	1	2	1	3	2	3	3	3	2	2	1	2	2	3	1	1	4	5	4	4	4	5	4	5	4	4	4	5	4	5	5
817	2025/5/17 18:30:06	188秒	微信	N/A	180.127.139.213(江苏-连云港)	2	2	7	1	1	3	2	1	5	2	1	3	2	3	1	1	1	3	2	2	2	3	2	3	5	4	1	1	5	4	4	4	5	5	4	5	3	4	3	3	5	4	5	2
698	2025/5/17 18:18:27	200秒	微信	N/A	114.229.61.237(江苏-镇江)	1	1	2	1	1	4	4	1	2	3	4	3	1	3	1	5	2	3	4	5	2	4	4	2	2	1	3	2	1	5	5	5	5	4	3	2	4	4	5	5	4	4	4	3
880	2025/5/17 18:37:48	313秒	微信	N/A	183.142.34.244(浙江-湖州)	2	2	5	5	4	4	2	4	2	4	5	5	4	4	3	4	4	5	5	4	4	3	4	4	2	4	5	4	2	3	3	4	5	4	4	5	4	4	5	5	4	4	5	4
832	2025/5/17 18:31:27	282秒	微信	N/A	125.87.85.163(重庆-重庆)	2	2	6	2	4	2	1	1	1	2	2	3	1	1	1	1	3	3	1	3	2	3	3	1	5	1	1	1	1	5	3	5	4	5	4	5	3	4	5	5	4	3	4	3
911	2025/5/17 18:42:01	233秒	微信	N/A	183.142.122.45(浙江-湖州)	1	1	2	1	1	1	1	2	4	3	3	2	2	2	2	1	3	3	2	3	1	2	1	2	2	2	2	1	1	5	4	4	4	4	3	4	4	4	5	1	5	5	2	4
780	2025/5/17 18:26:08	255秒	微信	N/A	183.130.157.2(浙江-温州)	1	2	5	4	2	1	2	2	2	1	2	3	2	2	1	2	1	2	1	2	3	3	1	5	5	2	1	4	2	4	5	5	4	5	4	4	4	5	5	5	4	5	5	3
925	2025/5/17 18:43:42	223秒	微信	N/A	110.87.250.143(福建-三明)	1	2	5	1	5	3	1	3	1	3	1	1	4	1	2	2	2	1	3	5	5	1	1	1	3	1	1	5	4	4	4	3	5	4	5	4	5	4	5	5	2	4	4	4
176	2025/5/17 17:41:49	227秒	微信	N/A	125.87.80.67(重庆-重庆)	1	2	7	1	2	2	2	1	1	2	1	1	2	4	5	5	5	2	4	3	4	4	4	4	3	4	2	4	4	3	4	4	4	4	4	4	4	5	5	3	4	4	4	4
147	2025/5/17 17:39:47	188秒	微信	N/A	123.189.113.156(辽宁-鞍山)	2	2	6	1	3	3	1	1	2	1	1	2	1	5	5	5	4	4	4	2	4	3	3	3	5	4	2	5	4	5	4	5	5	4	3	5	5	4	2	1	5	2	5	4
594	2025/5/17 18:09:24	277秒	微信	N/A	123.189.115.57(辽宁-鞍山)	1	2	7	4	3	4	4	5	4	5	5	3	4	3	2	4	4	3	3	5	1	5	5	3	4	5	2	2	1	4	4	5	5	4	5	4	4	4	5	5	3	4	4	1
679	2025/5/17 18:16:42	271秒	微信	N/A	140.250.146.39(山东-济南)	1	1	2	5	4	5	3	4	4	5	4	2	4	3	4	4	4	4	5	5	2	4	3	4	3	2	2	5	4	1	3	1	2	2	2	1	2	1	2	4	5	4	5	4
1024	2025/5/17 19:03:18	215秒	微信	N/A	218.91.189.222(江苏-南通)	2	1	4	2	4	4	4	4	5	4	4	5	5	3	4	3	5	5	5	5	5	4	5	4	4	4	4	5	4	2	3	1	2	1	2	1	1	3	3	4	4	5	5	1
172	2025/5/17 17:41:34	187秒	微信	N/A	118.112.195.86(四川-成都)	2	2	4	4	5	4	2	4	4	5	4	5	5	2	5	4	5	5	4	4	5	5	3	5	4	4	5	4	5	1	1	4	1	2	1	3	4	3	2	4	4	4	4	3
500	2025/5/17 18:03:29	238秒	微信	N/A	123.189.113.18(辽宁-鞍山)	1	2	4	4	5	5	5	4	5	3	4	4	5	4	3	5	4	5	4	5	5	3	5	4	4	5	4	4	4	2	3	4	1	2	2	5	2	1	2	2	3	4	5	4
586	2025/5/17 18:09:00	272秒	微信	N/A	220.161.199.253(福建-宁德)	1	1	4	5	5	4	5	2	5	4	5	5	3	5	5	3	5	5	5	5	3	4	4	4	5	5	5	5	4	3	3	2	4	1	5	4	4	1	2	3	1	5	5	4
680	2025/5/17 18:16:44	201秒	微信	N/A	117.28.43.144(福建-泉州)	1	2	6	3	3	1	5	3	5	4	2	3	4	4	4	4	5	3	5	3	4	4	4	1	3	4	4	2	3	4	5	2	2	4	5	5	2	5	3	5	4	5	4	5
763	2025/5/17 18:24:36	274秒	微信	N/A	125.125.233.17(浙江-湖州)	2	1	4	5	5	4	4	3	5	4	4	5	5	5	5	4	5	4	4	3	5	2	3	4	5	5	4	4	4	4	4	5	5	4	3	4	4	2	4	5	4	4	4	4
863	2025/5/17 18:35:25	299秒	微信	N/A	117.86.174.51(江苏-南通)	1	1	4	5	3	5	4	4	5	4	5	5	4	4	4	5	5	5	4	4	5	4	5	5	4	4	5	4	3	2	2	2	1	1	2	1	1	1	1	3	4	5	5	5
846	2025/5/17 18:32:50	283秒	微信	N/A	144.255.44.194(山东-烟台)	2	1	2	5	5	4	4	5	4	5	4	4	5	5	4	4	4	5	4	5	5	5	5	4	5	4	5	4	5	1	2	2	2	3	2	2	2	1	2	4	4	4	5	3
734	2025/5/17 18:21:36	276秒	微信	N/A	59.60.122.222(福建-莆田)	1	1	2	2	5	1	2	5	1	4	1	1	4	3	4	2	4	4	4	4	3	5	2	1	5	2	4	1	2	2	1	1	2	2	2	3	3	2	1	4	1	4	5	4
920	2025/5/17 18:43:11	195秒	微信	N/A	110.82.164.38(福建-莆田)	2	2	7	4	4	4	4	4	4	3	5	3	5	1	5	3	4	1	5	5	2	1	4	1	1	2	3	1	2	1	1	1	1	4	2	5	3	1	4	2	1	4	5	4
556	2025/5/17 18:07:05	221秒	微信	N/A	220.190.55.208(浙江-温州)	1	2	4	5	4	5	5	4	4	4	3	5	2	1	4	2	1	1	2	1	1	1	4	3	5	3	4	5	4	1	3	3	3	4	1	2	1	2	5	3	4	4	5	3
618	2025/5/17 18:11:05	239秒	微信	N/A	122.230.61.151(浙江-湖州)	1	2	5	1	5	5	3	1	4	2	4	4	4	5	4	2	5	2	5	2	1	2	5	5	3	5	4	5	5	4	5	2	3	2	4	5	1	3	1	5	5	4	4	5
819	2025/5/17 18:30:11	183秒	微信	N/A	125.125.193.155(浙江-湖州)	2	1	4	5	5	4	5	4	2	5	5	5	2	4	4	3	5	4	4	5	5	4	4	5	5	4	3	5	5	3	3	1	2	3	2	4	5	2	5	3	3	1	4	4
667	2025/5/17 18:15:40	271秒	微信	N/A	117.90.217.154(江苏-镇江)	1	1	1	5	3	5	4	5	4	4	4	5	5	5	4	4	5	4	4	3	4	5	4	5	5	3	4	5	4	4	5	4	2	4	4	4	4	4	4	5	4	4	4	2
808	2025/5/17 18:29:22	241秒	微信	N/A	218.87.205.180(江西-抚州)	1	1	3	5	5	5	5	4	4	4	5	5	4	4	4	5	4	5	4	3	4	5	5	4	4	5	5	2	5	4	5	5	5	5	2	3	5	3	3	1	4	4	2	2
423	2025/5/17 17:58:21	282秒	微信	N/A	125.87.88.17(重庆-重庆)	1	2	6	4	2	5	4	5	5	5	3	5	4	5	5	5	3	5	5	3	5	4	4	5	5	5	5	5	5	1	4	3	2	1	1	3	1	5	2	5	3	4	3	4
717	2025/5/17 18:20:14	271秒	微信	N/A	27.157.131.31(福建-三明)	2	1	2	3	5	4	4	4	5	4	5	2	3	1	1	1	1	2	2	2	2	2	4	5	4	5	2	4	4	2	1	3	3	5	2	3	2	3	3	4	5	2	5	1
126	2025/5/17 17:38:37	198秒	微信	N/A	59.54.238.121(江西-抚州)	1	1	3	4	5	2	4	4	4	4	3	5	5	5	2	5	2	3	3	2	3	2	4	1	3	3	2	4	5	2	4	4	2	3	1	3	5	3	3	3	4	2	4	5
732	2025/5/17 18:21:28	186秒	微信	N/A	125.87.84.160(重庆-重庆)	1	2	6	4	5	5	5	3	4	4	5	4	5	4	4	4	5	5	2	5	4	4	3	5	5	4	3	5	4	4	4	5	4	3	3	3	4	1	3	3	5	5	4	1
749	2025/5/17 18:23:26	216秒	微信	N/A	123.189.113.204(辽宁-鞍山)	1	2	5	3	1	2	1	4	3	4	1	1	4	4	3	2	5	4	2	3	1	2	2	5	1	4	2	2	1	5	5	4	2	3	4	4	5	5	5	4	4	4	3	1
1005	2025/5/17 18:59:52	247秒	微信	N/A	110.89.122.63(福建-三明)	1	1	2	1	4	5	2	4	4	4	3	3	1	2	4	3	3	5	4	4	5	4	2	3	3	4	4	1	1	4	5	4	4	2	5	5	4	4	5	4	5	4	3	5
831	2025/5/17 18:31:14	309秒	微信	N/A	183.142.38.170(浙江-湖州)	1	2	6	3	1	2	4	3	1	4	3	2	1	4	3	5	4	4	4	5	5	5	4	5	5	4	3	4	4	1	3	4	2	2	5	5	2	1	5	4	5	5	4	5
1010	2025/5/17 19:00:29	271秒	微信	N/A	123.189.115.51(辽宁-鞍山)	1	1	2	2	4	4	4	5	4	5	3	5	4	4	4	4	4	5	4	4	2	4	2	3	4	4	4	5	3	3	2	3	3	4	2	5	4	4	1	5	5	5	4	4
728	2025/5/17 18:21:11	297秒	微信	N/A	110.188.37.85(四川-成都)	2	1	3	5	4	5	3	4	5	3	5	5	4	5	5	4	3	3	5	4	5	5	4	4	4	4	4	5	4	2	3	4	2	1	5	3	3	3	5	5	4	5	3	5
921	2025/5/17 18:43:26	244秒	微信	N/A	111.72.194.22(江西-鹰潭)	2	1	4	4	4	5	5	4	5	4	5	4	5	4	5	5	5	4	3	5	4	3	5	5	4	4	4	5	4	2	5	2	3	3	3	4	5	5	1	5	5	5	2	4
849	2025/5/17 18:33:15	229秒	微信	N/A	59.60.120.173(福建-莆田)	2	2	7	5	5	5	4	4	5	3	4	4	5	4	5	5	5	5	5	4	4	4	5	3	5	5	5	4	4	4	5	4	4	4	4	5	5	3	3	4	4	4	5	5
886	2025/5/17 18:38:23	222秒	微信	N/A	125.87.95.246(重庆-重庆)	2	1	2	1	2	2	1	2	2	1	1	2	1	5	5	2	3	5	5	4	3	3	1	2	4	4	2	2	2	5	4	4	5	5	5	5	4	2	5	5	4	5	4	4
389	2025/5/17 17:55:02	241秒	微信	N/A	121.205.177.108(福建-宁德)	1	2	5	3	3	4	2	5	3	2	1	1	1	2	5	3	2	5	5	4	2	1	3	1	4	4	2	2	1	4	5	5	5	4	5	3	4	5	4	3	4	5	4	5
875	2025/5/17 18:36:58	276秒	微信	N/A	218.86.72.157(福建-宁德)	1	2	7	1	3	2	1	5	5	2	1	4	2	3	2	4	4	2	5	4	5	4	3	2	3	1	3	4	1	4	4	5	5	4	5	5	4	5	5	5	2	5	5	5
183	2025/5/17 17:42:17	183秒	微信	N/A	58.52.156.110(湖北-咸宁)	1	2	7	5	4	4	3	3	4	4	4	3	5	4	5	3	3	5	5	4	4	3	2	5	3	5	3	1	2	4	4	3	1	1	1	4	4	4	4	4	4	4	4	4
773	2025/5/17 18:25:30	292秒	微信	N/A	123.189.114.179(辽宁-鞍山)	1	1	2	2	2	3	2	1	5	2	3	3	5	5	5	5	5	4	4	4	5	5	5	5	5	4	5	4	4	4	2	5	5	5	4	2	4	3	4	5	4	5	5	5
551	2025/5/17 18:06:54	280秒	微信	N/A	125.87.92.39(重庆-重庆)	1	2	5	5	4	5	4	5	3	4	4	4	3	3	5	4	4	4	4	5	5	5	4	3	2	5	4	4	4	5	5	2	5	3	5	4	5	5	3	5	5	5	5	4
557	2025/5/17 18:07:15	249秒	微信	N/A	27.150.193.177(福建-莆田)	1	2	5	5	5	5	4	4	5	2	3	5	5	3	5	5	4	4	5	4	4	3	5	4	5	4	4	3	3	4	4	4	5	5	4	5	4	4	4	2	4	3	2	5
1011	2025/5/17 19:00:41	182秒	微信	N/A	140.250.145.87(山东-济南)	2	2	5	5	4	4	4	5	4	4	5	4	3	4	4	4	5	4	5	5	3	4	4	5	4	5	4	4	4	3	4	5	5	4	5	4	5	5	4	3	2	1	5	4
400	2025/5/17 17:56:04	304秒	微信	N/A	218.86.67.175(福建-宁德)	2	2	5	5	5	5	4	4	4	4	5	5	4	5	5	4	4	5	2	4	5	4	4	5	4	4	4	4	5	2	2	2	2	3	5	4	4	2	2	5	5	5	5	1
720	2025/5/17 18:20:33	244秒	微信	N/A	222.184.183.236(江苏-南通)	1	2	4	5	5	5	4	4	4	2	4	4	4	5	5	5	5	4	3	5	5	3	4	5	5	5	5	5	2	4	5	2	5	2	4	3	4	5	3	4	4	5	4	3
543	2025/5/17 18:06:25	183秒	微信	N/A	123.189.115.133(辽宁-鞍山)	1	1	4	5	4	5	4	5	4	2	4	4	3	5	4	5	3	4	4	4	4	4	4	4	4	4	4	4	3	4	4	5	4	3	5	4	5	2	3	5	4	4	5	3
608	2025/5/17 18:10:20	227秒	微信	N/A	111.72.133.133(江西-宜春)	1	1	4	4	4	5	3	4	4	5	4	4	4	5	4	4	4	4	4	4	4	4	5	4	3	4	4	3	4	3	5	4	4	3	5	4	4	4	3	4	4	4	4	2
1006	2025/5/17 18:59:59	249秒	微信	N/A	120.35.202.185(福建-三明)	1	2	4	3	3	5	4	4	4	5	5	3	5	4	5	4	4	5	4	4	4	4	4	5	4	4	4	4	5	4	5	5	3	4	3	4	3	4	4	5	4	3	5	3
615	2025/5/17 18:10:52	265秒	微信	N/A	125.87.80.192(重庆-重庆)	1	1	2	4	4	5	5	4	4	3	2	4	5	5	4	3	5	4	5	2	3	4	2	5	5	2	4	4	4	4	5	4	3	4	5	4	4	5	4	3	4	1	3	4
785	2025/5/17 18:26:20	218秒	微信	N/A	222.189.106.49(江苏-连云港)	1	1	2	2	4	5	4	4	5	3	5	5	4	4	4	4	4	5	5	4	4	4	4	4	5	3	5	4	4	5	4	5	3	5	5	4	5	2	4	5	4	4	5	5
768	2025/5/17 18:25:12	251秒	微信	N/A	118.113.245.178(四川-成都)	1	1	4	4	4	4	4	5	4	4	4	4	4	5	5	4	4	2	4	4	5	5	4	3	4	5	4	5	5	4	4	5	4	4	5	5	4	5	4	4	3	3	5	2
646	2025/5/17 18:13:30	181秒	微信	N/A	123.189.113.52(辽宁-鞍山)	2	2	7	4	5	5	3	5	3	5	5	4	3	4	5	4	5	3	5	4	3	5	4	4	3	5	4	5	5	5	4	4	5	5	4	4	5	4	5	5	1	5	1	3
184	2025/5/17 17:42:19	298秒	微信	N/A	111.179.72.110(湖北-咸宁)	1	1	4	5	4	5	4	5	4	5	4	5	5	5	4	3	5	4	4	4	5	3	5	5	5	4	5	4	5	3	1	1	3	4	2	5	1	5	5	5	4	4	5	4
735	2025/5/17 18:21:49	255秒	微信	N/A	120.37.2.99(福建-泉州)	1	2	5	4	4	5	5	5	4	4	2	5	5	4	5	5	2	4	3	4	5	5	5	5	4	4	5	3	4	2	4	5	3	1	5	3	5	1	4	5	4	5	4	4
983	2025/5/17 18:55:43	204秒	微信	N/A	61.154.89.198(福建-三明)	1	2	7	5	5	3	5	5	4	5	3	4	5	4	4	5	5	5	3	3	4	4	3	5	5	5	3	5	3	3	4	3	1	3	5	1	5	5	5	3	3	2	2	5
577	2025/5/17 18:08:35	201秒	微信	N/A	125.87.95.233(重庆-重庆)	2	2	5	4	5	5	5	3	5	5	4	4	5	5	5	4	4	4	4	4	3	5	5	4	4	5	4	4	5	4	2	4	4	3	5	4	5	4	2	4	2	4	4	1
988	2025/5/17 18:56:49	272秒	微信	N/A	125.87.92.193(重庆-重庆)	1	1	4	5	1	1	2	3	3	1	5	2	2	3	4	3	3	3	3	4	1	5	1	2	4	4	2	1	2	4	5	3	4	4	5	5	1	2	4	4	4	3	4	5
991	2025/5/17 18:57:15	208秒	微信	N/A	49.79.133.185(江苏-南通)	1	2	4	2	1	4	3	2	4	1	4	1	3	2	3	1	4	1	2	3	1	2	3	4	3	5	5	5	3	5	5	4	4	4	4	3	4	3	4	4	5	5	5	4
671	2025/5/17 18:16:08	294秒	微信	N/A	125.87.86.11(重庆-重庆)	1	2	7	3	1	2	2	5	1	3	5	1	3	3	5	2	2	5	5	2	4	5	1	2	2	2	4	3	4	4	2	1	5	3	4	4	2	1	3	4	4	5	4	5
453	2025/5/17 18:00:32	266秒	微信	N/A	117.90.219.126(江苏-镇江)	1	1	4	3	1	5	5	1	3	1	2	2	4	5	5	4	4	3	5	3	5	5	4	4	4	5	4	5	4	3	4	3	1	5	3	3	3	3	2	4	4	4	4	5
954	2025/5/17 18:49:40	297秒	微信	N/A	144.255.44.208(山东-烟台)	2	1	2	4	5	3	1	2	1	4	1	4	4	4	5	5	4	4	5	4	4	5	3	5	4	4	5	4	5	2	4	5	4	5	5	4	4	4	4	5	3	5	5	2
974	2025/5/17 18:53:41	243秒	微信	N/A	111.72.129.142(江西-宜春)	1	1	4	2	5	5	4	4	5	4	5	4	3	5	5	4	3	4	5	3	5	4	2	1	3	4	4	3	5	5	3	5	4	3	4	4	4	4	5	5	4	4	4	4
1015	2025/5/17 19:01:32	291秒	微信	N/A	221.227.177.35(江苏-南通)	1	1	3	5	3	5	4	5	5	3	4	3	4	4	5	4	4	4	4	4	4	4	4	5	3	4	5	4	3	3	5	3	3	5	5	5	5	5	3	4	5	4	4	5
249	2025/5/17 17:46:36	367秒	微信	N/A	183.130.155.196(浙江-温州)	1	1	1	4	4	4	4	5	5	5	5	3	4	5	4	4	4	4	4	5	3	4	4	4	4	5	4	4	4	5	5	2	4	5	4	5	5	3	4	4	1	3	2	4
888	2025/5/17 18:38:42	268秒	微信	N/A	59.58.151.103(福建-莆田)	1	2	7	5	5	5	5	4	5	4	4	4	5	4	4	4	3	5	4	5	4	5	3	5	4	5	4	5	4	4	5	4	3	5	5	4	5	5	4	4	5	5	4	3
759	2025/5/17 18:24:20	258秒	微信	N/A	58.52.155.83(湖北-咸宁)	1	1	4	4	2	4	2	1	5	4	3	2	1	2	5	3	4	3	4	4	5	4	4	1	4	2	3	1	3	4	3	5	4	5	5	5	4	5	5	5	4	3	5	5
937	2025/5/17 18:46:39	206秒	微信	N/A	124.72.100.51(福建-泉州)	2	2	5	4	4	3	3	2	2	4	4	1	2	5	3	1	2	1	5	1	4	4	5	5	5	5	5	4	2	4	5	4	4	5	4	5	5	2	4	4	3	2	1	3
1017	2025/5/17 19:01:49	202秒	微信	N/A	120.33.4.202(福建-泉州)	2	1	2	1	4	2	2	5	4	4	3	3	3	3	5	4	4	4	4	4	4	4	2	1	3	5	5	2	4	4	4	4	3	5	4	5	4	5	4	5	5	5	2	4
830	2025/5/17 18:31:06	260秒	微信	N/A	125.87.92.244(重庆-重庆)	2	1	3	2	5	4	5	2	4	3	4	5	5	4	4	5	4	4	2	4	2	4	5	4	4	4	2	3	1	5	4	4	4	4	5	4	5	4	3	1	4	3	3	4
327	2025/5/17 17:51:30	285秒	微信	N/A	123.189.115.92(辽宁-鞍山)	1	2	7	4	4	2	5	5	4	4	5	4	4	3	3	4	5	4	2	1	5	5	1	4	4	4	3	5	3	5	5	4	4	4	4	4	4	5	5	4	5	4	4	4
730	2025/5/17 18:21:15	273秒	微信	N/A	221.233.233.207(湖北-咸宁)	1	2	5	4	4	4	4	2	5	5	5	5	3	5	3	5	4	3	4	4	3	3	2	4	4	5	5	4	2	4	5	4	4	3	5	5	5	5	5	4	5	4	4	3
250	2025/5/17 17:46:37	288秒	微信	N/A	125.87.80.224(重庆-重庆)	1	1	1	5	5	3	4	5	4	5	4	2	4	5	4	2	4	5	4	4	5	5	4	5	4	5	3	4	5	5	4	5	5	5	3	4	5	4	3	2	5	1	2	4
794	2025/5/17 18:27:28	313秒	微信	N/A	49.84.88.24(江苏-镇江)	2	2	5	5	4	5	5	5	4	4	4	4	4	4	4	4	3	4	5	5	4	4	5	5	2	4	5	4	4	2	4	5	5	4	5	5	5	4	4	3	3	5	4	1
1030	2025/5/17 19:05:20	191秒	微信	N/A	180.105.234.216(江苏-连云港)	2	2	6	5	4	4	4	4	4	5	5	4	2	2	5	5	5	4	4	4	5	5	5	5	4	2	4	5	5	4	4	5	5	5	4	4	4	5	4	3	5	5	5	5
180	2025/5/17 17:42:09	256秒	微信	N/A	118.122.108.71(四川-成都)	2	1	2	4	5	5	4	5	5	3	4	4	5	5	5	4	4	4	4	4	3	5	4	3	5	5	4	5	2	4	4	5	5	4	4	5	5	5	5	5	5	4	5	4
241	2025/5/17 17:46:01	291秒	微信	N/A	125.87.88.231(重庆-重庆)	1	1	4	5	5	2	4	4	5	5	5	5	4	5	3	5	5	5	4	5	5	3	5	3	5	5	3	4	5	4	4	5	4	4	4	4	5	4	4	4	5	3	5	5
1000	2025/5/17 18:58:48	257秒	微信	N/A	117.26.192.71(福建-莆田)	1	1	2	4	5	5	5	5	5	5	5	4	5	4	5	4	3	5	4	5	4	4	5	4	4	4	5	4	4	4	2	5	5	5	5	5	5	5	4	4	4	4	5	5
1029	2025/5/17 19:04:55	215秒	微信	N/A	222.77.214.182(福建-莆田)	1	2	7	5	5	4	5	2	4	5	5	5	5	4	4	4	4	4	5	4	4	5	4	5	3	4	5	4	5	5	4	5	5	5	5	5	4	4	4	4	4	5	3	5
841	2025/5/17 18:32:15	189秒	微信	N/A	111.179.79.95(湖北-咸宁)	1	2	6	4	5	5	4	5	5	4	4	4	3	3	4	5	4	4	4	4	5	4	5	5	5	4	4	2	5	5	4	4	5	5	5	5	3	5	5	4	4	4	5	4
392	2025/5/17 17:55:20	274秒	微信	N/A	180.127.139.224(江苏-连云港)	1	1	3	4	4	5	5	5	4	4	4	4	5	4	4	4	4	4	5	5	5	5	5	5	4	5	2	5	5	4	4	4	2	5	4	4	5	5	4	3	5	4	4	4
709	2025/5/17 18:19:19	249秒	微信	N/A	171.41.131.75(湖北-荆门)	1	2	4	5	3	5	5	4	3	5	4	4	5	4	4	4	4	3	4	4	4	4	3	4	5	5	2	4	5	4	4	4	5	4	5	4	3	4	5	3	4	4	5	5
799	2025/5/17 18:28:23	219秒	微信	N/A	27.150.195.243(福建-莆田)	2	2	7	5	5	4	5	3	4	4	5	2	4	4	5	5	4	4	4	5	4	2	5	4	3	4	4	4	5	4	5	5	5	4	5	4	5	4	4	5	4	5	2	4
466	2025/5/17 18:01:21	265秒	微信	N/A	202.101.213.92(江西-抚州)	2	2	6	4	4	3	4	4	5	5	5	4	5	4	4	4	5	4	3	4	4	5	4	4	3	4	5	4	5	5	4	5	3	3	5	5	4	5	5	4	5	4	4	4
173	2025/5/17 17:41:35	206秒	微信	N/A	110.86.179.37(福建-莆田)	1	1	4	4	5	4	4	5	5	5	4	5	4	4	4	4	4	5	4	4	5	4	4	5	4	4	4	4	5	1	1	2	5	3	5	3	1	4	4	5	5	3	5	5
770	2025/5/17 18:25:15	248秒	微信	N/A	111.72.196.84(江西-鹰潭)	1	1	1	4	4	2	3	3	2	3	4	3	2	5	3	4	3	5	4	4	4	4	1	1	3	5	5	2	5	4	4	4	5	4	4	5	2	5	5	5	3	5	1	1
775	2025/5/17 18:25:38	211秒	微信	N/A	110.82.143.99(福建-莆田)	2	1	2	4	4	3	3	5	3	4	4	5	4	5	4	4	2	4	5	5	2	4	3	1	1	2	3	1	5	4	4	3	5	4	3	5	5	5	4	4	5	4	5	4
936	2025/5/17 18:46:16	239秒	微信	N/A	115.208.68.131(浙江-湖州)	2	2	5	5	4	5	5	4	4	4	2	4	3	4	4	5	2	5	5	4	5	2	5	1	1	5	2	2	1	5	5	4	4	4	5	4	4	5	5	5	5	2	5	2
677	2025/5/17 18:16:31	201秒	微信	N/A	117.90.218.196(江苏-镇江)	1	1	3	5	5	5	5	4	4	4	3	3	4	3	2	5	5	5	4	4	4	5	4	4	3	4	2	5	4	4	4	4	5	5	4	5	5	4	5	1	1	3	1	5
947	2025/5/17 18:48:32	299秒	微信	N/A	114.229.63.9(江苏-镇江)	2	1	3	2	5	4	4	5	4	4	4	5	4	5	4	4	2	5	4	5	4	4	3	5	4	4	3	3	5	5	4	2	4	4	3	4	4	3	4	4	1	3	4	2
847	2025/5/17 18:33:02	272秒	微信	N/A	110.81.48.133(福建-泉州)	2	2	5	2	4	4	5	4	4	5	4	5	5	5	5	3	5	3	4	4	5	5	4	5	2	4	5	4	2	4	4	2	3	4	4	5	4	5	4	4	5	5	5	4
699	2025/5/17 18:18:27	269秒	微信	N/A	117.90.219.142(江苏-镇江)	1	2	6	4	4	4	4	4	5	4	3	5	5	5	4	4	4	5	3	5	5	4	3	5	5	4	5	4	4	4	4	3	5	3	3	5	4	4	4	5	4	4	4	5
658	2025/5/17 18:15:00	197秒	微信	N/A	27.159.142.150(福建-宁德)	1	2	6	3	4	4	4	5	5	4	5	4	5	5	5	4	3	4	5	4	5	5	5	5	4	5	5	5	5	5	4	4	2	4	5	4	5	4	5	4	5	5	5	1
394	2025/5/17 17:55:25	241秒	微信	N/A	125.125.55.175(浙江-湖州)	2	2	4	4	2	4	5	4	5	3	3	5	4	2	4	3	1	1	2	5	3	3	1	2	1	2	4	2	2	2	2	3	5	4	5	4	5	5	5	4	4	4	4	5
952	2025/5/17 18:49:12	286秒	微信	N/A	117.86.203.111(江苏-南通)	2	2	5	3	3	3	1	4	1	1	4	3	1	3	2	1	4	3	3	4	4	3	4	5	5	5	5	3	5	5	5	2	5	5	4	4	2	4	5	4	4	4	4	4
976	2025/5/17 18:54:15	234秒	微信	N/A	140.237.29.205(福建-莆田)	2	1	4	3	3	2	2	1	4	5	2	1	4	5	2	5	3	5	5	5	5	4	5	5	2	5	4	4	5	5	5	4	4	4	4	4	4	5	3	4	4	5	4	5
795	2025/5/17 18:27:50	300秒	微信	N/A	125.87.87.241(重庆-重庆)	2	2	6	4	4	4	5	5	5	5	5	2	2	4	5	3	5	3	5	4	5	4	1	2	1	5	5	5	1	4	4	5	4	5	5	5	5	2	4	5	2	5	5	4
984	2025/5/17 18:56:01	230秒	微信	N/A	120.37.2.241(福建-泉州)	1	1	4	4	5	4	3	5	4	4	4	4	5	5	3	5	5	5	4	4	5	4	5	3	5	5	4	5	4	5	5	4	5	4	5	5	4	3	4	4	5	5	2	1
896	2025/5/17 18:39:45	224秒	微信	N/A	144.255.40.233(山东-烟台)	1	2	5	5	4	4	4	3	5	3	4	5	5	5	4	5	4	5	4	4	5	4	5	4	4	4	5	5	5	4	5	5	5	4	5	4	5	5	5	5	5	5	5	5
326	2025/5/17 17:51:29	225秒	微信	N/A	114.229.58.220(江苏-镇江)	1	1	4	1	2	4	4	1	4	3	3	1	3	3	4	4	3	4	2	5	2	2	1	1	3	2	1	4	5	5	4	4	4	3	4	4	3	5	5	5	5	5	5	3
851	2025/5/17 18:33:27	276秒	微信	N/A	58.52.141.137(湖北-咸宁)	1	2	7	4	3	4	4	4	4	4	4	4	4	5	2	5	2	3	2	4	1	3	5	5	2	2	4	3	1	5	4	5	4	3	4	5	5	3	4	2	5	1	3	4
710	2025/5/17 18:19:28	254秒	微信	N/A	111.72.194.172(江西-鹰潭)	2	2	4	2	2	5	4	4	4	1	5	3	3	4	2	5	5	3	4	3	1	1	5	5	4	5	4	4	5	3	4	5	4	4	5	5	4	5	4	5	4	5	5	5
490	2025/5/17 18:02:52	216秒	微信	N/A	183.143.206.57(浙江-湖州)	2	1	1	3	5	5	4	4	4	3	4	4	5	5	5	5	5	4	3	3	4	4	1	5	4	3	4	4	1	5	5	5	5	5	5	5	4	3	5	5	3	4	5	4
890	2025/5/17 18:38:50	235秒	微信	N/A	27.150.87.201(福建-三明)	1	2	6	4	4	5	2	4	2	5	5	5	4	4	4	5	4	5	3	4	3	4	5	4	4	5	2	2	4	5	4	4	3	5	5	4	4	5	5	5	4	4	5	4
580	2025/5/17 18:08:43	267秒	微信	N/A	117.24.176.35(福建-泉州)	2	1	1	5	4	5	4	4	5	4	4	4	3	5	4	3	4	5	4	4	4	5	4	4	5	4	4	5	5	4	5	2	4	4	4	5	5	4	4	5	4	5	4	4
970	2025/5/17 18:52:44	206秒	微信	N/A	140.250.145.170(山东-济南)	1	2	7	4	5	5	2	5	5	4	4	4	4	5	4	4	5	4	3	5	5	4	4	5	4	4	4	5	5	4	5	4	4	5	5	4	4	4	4	5	5	4	4	4
456	2025/5/17 18:00:43	223秒	微信	N/A	125.78.219.104(福建-莆田)	1	2	6	4	3	3	5	5	5	5	4	4	5	5	3	5	4	4	4	5	5	5	3	4	4	4	5	4	5	5	5	4	4	4	5	4	5	4	4	3	5	4	5	5
546	2025/5/17 18:06:35	225秒	微信	N/A	27.156.194.83(福建-宁德)	1	1	4	4	3	4	5	5	4	5	5	4	4	4	3	4	4	5	5	4	5	5	4	3	5	5	5	5	4	1	1	2	3	2	5	5	4	3	2	4	4	4	4	5
1028	2025/5/17 19:04:33	197秒	微信	N/A	117.90.223.58(江苏-镇江)	2	2	6	4	3	5	4	5	4	4	3	5	4	4	4	4	3	4	5	5	5	3	3	5	4	5	5	4	4	1	5	2	1	1	4	4	4	2	4	4	4	5	5	5
694	2025/5/17 18:18:05	225秒	微信	N/A	171.41.151.101(湖北-荆门)	2	2	6	5	4	5	4	4	4	4	4	4	5	4	4	5	3	5	5	5	5	5	4	5	4	5	5	2	4	4	4	2	2	2	3	4	4	2	4	3	4	5	5	3
869	2025/5/17 18:36:12	306秒	微信	N/A	125.109.57.43(浙江-温州)	1	2	5	5	5	4	3	5	5	5	5	5	4	5	5	4	5	4	4	3	3	5	4	4	4	4	4	5	5	5	4	3	4	2	4	5	5	3	4	3	5	5	2	2
951	2025/5/17 18:49:08	223秒	微信	N/A	111.179.172.48(湖北-黄冈)	2	1	3	5	3	3	5	4	4	5	5	4	4	5	5	5	3	4	5	5	5	4	5	4	5	5	5	3	4	5	4	4	5	3	3	5	4	3	4	5	3	4	3	5
758	2025/5/17 18:24:20	198秒	微信	N/A	58.52.155.83(湖北-咸宁)	2	1	4	5	3	5	4	5	4	4	5	5	3	4	3	4	3	5	5	5	4	4	4	4	4	5	3	4	3	4	4	4	4	4	4	3	5	4	4	2	4	2	3	5
881	2025/5/17 18:37:50	183秒	微信	N/A	110.81.48.30(福建-泉州)	1	1	4	5	5	4	4	5	4	5	4	5	4	5	5	5	5	5	4	4	5	5	5	4	5	4	4	5	4	5	4	4	5	4	4	5	3	5	2	5	5	4	4	3
953	2025/5/17 18:49:28	188秒	微信	N/A	125.87.90.155(重庆-重庆)	1	1	3	4	4	4	4	4	5	4	5	5	2	3	5	2	5	4	5	4	4	4	2	3	5	4	4	4	4	5	5	4	4	4	3	2	5	4	5	2	5	4	3	3
547	2025/5/17 18:06:35	281秒	微信	N/A	125.70.220.116(四川-成都)	1	1	3	4	4	4	4	4	4	5	5	5	4	4	5	4	5	4	4	4	4	5	4	4	4	5	4	5	3	4	2	5	5	4	4	5	3	5	5	3	4	3	5	5
177	2025/5/17 17:41:55	212秒	微信	N/A	125.125.130.99(浙江-湖州)	1	1	1	5	3	4	5	4	5	4	2	5	5	5	5	3	4	5	5	4	4	4	4	5	4	5	5	5	4	4	3	4	4	5	4	4	5	5	5	4	5	5	5	3
578	2025/5/17 18:08:35	252秒	微信	N/A	123.189.112.68(辽宁-鞍山)	2	2	6	3	5	4	5	4	5	5	4	4	5	4	5	5	5	4	4	5	3	5	4	4	4	4	4	5	4	5	4	3	4	5	5	5	4	5	4	3	5	5	5	5
719	2025/5/17 18:20:32	296秒	微信	N/A	120.43.33.88(福建-宁德)	2	1	3	4	4	3	4	4	3	4	4	4	4	3	5	5	4	4	3	2	3	2	5	5	5	5	5	5	5	5	5	4	3	5	4	4	5	5	5	5	4	5	5	5
772	2025/5/17 18:25:19	235秒	微信	N/A	114.231.89.219(江苏-南通)	2	1	4	4	5	2	5	4	5	5	4	4	3	4	5	5	4	2	5	4	4	5	4	5	4	5	4	4	4	3	4	3	2	4	4	3	1	5	1	5	4	4	4	4
675	2025/5/17 18:16:20	269秒	微信	N/A	58.52.171.75(湖北-咸宁)	2	2	4	4	4	5	5	5	5	4	4	5	3	5	4	3	4	5	4	5	4	4	3	4	4	4	4	4	5	1	2	3	5	4	3	4	5	1	3	4	4	4	4	5
959	2025/5/17 18:50:31	215秒	微信	N/A	49.70.148.134(江苏-镇江)	1	1	2	4	3	4	5	4	5	4	4	4	5	4	5	4	4	4	5	3	5	5	5	4	4	5	4	5	4	5	4	3	4	5	4	4	5	5	2	4	5	5	4	3
531	2025/5/17 18:05:38	214秒	微信	N/A	121.205.222.243(福建-莆田)	1	2	6	4	4	5	5	4	5	5	5	3	5	5	4	5	4	4	4	3	4	4	5	5	5	4	3	4	4	1	4	4	5	1	4	4	3	1	2	1	3	3	3	4
558	2025/5/17 18:07:17	247秒	微信	N/A	125.125.129.102(浙江-湖州)	1	2	6	5	4	4	5	4	5	4	5	4	5	4	5	5	4	5	4	3	4	4	4	5	4	5	4	4	4	5	5	2	3	4	5	5	4	4	3	4	4	4	5	5
912	2025/5/17 18:42:06	254秒	微信	N/A	123.189.113.36(辽宁-鞍山)	2	2	5	4	3	4	5	5	5	5	3	5	5	4	4	5	4	5	4	5	5	5	5	4	4	5	4	3	4	4	4	5	5	5	3	5	3	3	4	3	4	4	4	4
963	2025/5/17 18:51:38	222秒	微信	N/A	118.213.47.236(青海-黄南)	1	2	5	4	5	4	5	5	5	5	4	4	4	4	5	5	4	3	5	5	5	5	5	2	5	5	5	4	5	5	4	2	4	4	4	4	5	4	5	4	3	4	4	3
840	2025/5/17 18:32:15	234秒	微信	N/A	218.87.205.191(江西-抚州)	1	1	4	2	3	1	2	1	1	1	2	2	2	3	4	5	3	4	4	3	4	5	3	1	3	4	2	4	1	4	4	3	4	4	4	5	5	4	5	4	5	5	4	4
548	2025/5/17 18:06:36	282秒	微信	N/A	171.41.129.7(湖北-荆门)	2	1	1	3	3	4	4	4	5	2	4	4	5	2	2	5	3	1	4	3	4	1	2	3	4	1	2	5	3	5	4	4	5	5	5	5	5	4	5	5	4	2	1	3
796	2025/5/17 18:27:52	196秒	微信	N/A	110.81.48.202(福建-泉州)	1	1	2	5	3	5	5	4	5	3	5	5	5	1	2	3	4	5	3	3	3	1	5	5	5	2	5	4	5	4	3	4	5	4	5	4	5	3	5	4	4	4	5	5
460	2025/5/17 18:01:05	277秒	微信	N/A	183.130.196.171(浙江-温州)	2	2	5	5	4	4	4	5	4	2	5	5	4	4	5	4	4	3	4	4	5	5	5	4	2	5	5	4	4	4	5	5	5	5	4	5	4	3	3	4	4	2	3	5
1003	2025/5/17 18:59:18	209秒	微信	N/A	111.179.106.75(湖北-咸宁)	2	1	4	4	3	4	5	5	4	5	5	4	3	4	4	3	5	4	4	4	5	5	5	5	4	5	4	4	3	4	5	5	5	5	5	5	4	5	5	5	4	5	5	4
792	2025/5/17 18:27:12	237秒	微信	N/A	111.170.72.64(湖北-咸宁)	1	1	3	5	2	5	5	4	4	3	5	5	4	5	4	5	5	4	3	4	4	5	4	4	5	4	3	5	5	5	4	5	5	5	5	4	4	4	4	2	5	5	5	3
722	2025/5/17 18:20:41	288秒	微信	N/A	140.250.148.117(山东-济南)	2	1	3	4	4	5	4	4	5	4	4	5	5	3	2	4	5	5	4	4	5	5	5	4	4	5	4	5	5	2	4	4	4	5	5	4	5	3	5	4	5	4	5	5
789	2025/5/17 18:26:47	194秒	微信	N/A	117.28.41.162(福建-泉州)	1	2	5	4	5	4	4	5	4	4	5	5	5	4	5	5	5	5	4	4	4	5	5	4	4	5	4	3	4	5	5	3	4	4	5	5	4	4	4	4	5	4	4	5
859	2025/5/17 18:34:44	182秒	微信	N/A	140.237.15.216(福建-莆田)	1	1	2	5	4	5	5	4	5	2	4	5	3	5	5	4	5	4	5	5	3	5	5	5	4	5	5	4	4	3	4	4	4	5	5	4	4	5	5	5	4	5	5	3
247	2025/5/17 17:46:24	271秒	微信	N/A	222.212.224.234(四川-成都)	2	1	2	5	5	4	4	5	4	4	4	4	5	5	5	4	5	4	5	4	5	5	3	5	4	5	5	4	4	5	5	5	5	4	4	5	5	4	4	5	3	4	5	4
609	2025/5/17 18:10:22	189秒	微信	N/A	180.120.0.228(江苏-南通)	1	1	1	5	5	4	4	5	5	3	5	5	5	4	2	5	5	5	5	5	5	3	5	4	4	4	5	5	5	5	4	4	4	4	5	5	2	5	4	2	5	5	5	4
897	2025/5/17 18:39:57	192秒	微信	N/A	111.72.132.52(江西-宜春)	1	2	4	1	2	1	1	3	1	2	1	2	2	4	4	3	4	5	4	4	3	4	4	1	3	2	1	4	2	5	3	5	4	4	4	4	5	4	4	4	5	5	5	5
179	2025/5/17 17:42:06	226秒	微信	N/A	27.156.197.179(福建-宁德)	2	2	5	3	5	5	5	3	3	5	3	3	5	5	3	5	4	2	4	3	5	4	5	2	3	3	5	4	4	5	3	4	4	5	4	4	5	4	5	5	4	5	4	3
893	2025/5/17 18:39:13	244秒	微信	N/A	125.78.218.107(福建-莆田)	1	2	4	4	5	4	2	5	3	5	5	5	4	4	4	4	5	5	4	5	5	4	4	4	5	4	4	3	4	4	5	5	3	4	4	5	4	4	4	5	4	4	4	4
910	2025/5/17 18:41:48	219秒	微信	N/A	120.42.148.11(福建-泉州)	1	1	3	4	5	4	4	4	5	4	5	4	5	4	5	5	4	4	4	4	5	3	5	4	5	5	3	4	4	5	5	3	5	4	5	4	2	5	4	5	5	3	3	5
549	2025/5/17 18:06:41	196秒	微信	N/A	27.152.220.253(福建-泉州)	2	2	5	4	4	4	5	5	5	3	4	5	4	4	4	5	5	3	5	5	4	5	4	5	4	5	4	5	4	4	4	3	4	5	4	5	2	4	5	2	4	1	4	5
975	2025/5/17 18:53:51	244秒	微信	N/A	220.190.49.214(浙江-温州)	2	1	3	5	5	5	3	5	4	4	5	5	4	5	5	3	4	5	5	4	5	4	4	5	3	4	5	4	5	5	4	4	5	5	4	5	4	2	4	4	4	4	4	5
560	2025/5/17 18:07:34	185秒	微信	N/A	111.72.194.83(江西-鹰潭)	1	1	3	4	5	5	5	4	5	4	5	5	4	4	5	4	4	5	5	4	5	3	4	5	3	4	5	4	4	4	5	4	5	3	5	4	5	5	3	4	4	4	5	5
1016	2025/5/17 19:01:33	228秒	微信	N/A	125.87.91.193(重庆-重庆)	2	2	4	4	2	1	4	3	2	3	2	4	4	4	4	4	4	5	5	5	5	5	5	4	4	4	5	5	5	3	5	4	4	4	5	5	5	5	4	5	5	5	5	5
648	2025/5/17 18:13:51	296秒	微信	N/A	123.189.112.139(辽宁-鞍山)	2	1	1	5	4	4	5	4	3	4	4	4	4	4	5	5	5	4	3	4	4	4	2	5	5	4	4	4	4	2	4	4	2	1	1	2	4	4	4	5	4	5	5	5
857	2025/5/17 18:34:33	192秒	微信	N/A	123.189.113.105(辽宁-鞍山)	1	2	5	5	3	5	2	4	4	5	4	4	5	5	5	5	4	5	5	4	2	4	3	5	5	4	5	5	4	5	2	5	3	5	2	5	5	4	3	5	5	5	4	5
622	2025/5/17 18:11:18	212秒	微信	N/A	111.72.195.242(江西-鹰潭)	1	1	3	4	4	5	4	4	4	4	4	5	5	4	5	5	4	5	5	4	4	5	4	4	3	5	4	5	4	5	5	3	4	3	5	3	5	3	4	5	5	4	5	5
850	2025/5/17 18:33:22	216秒	微信	N/A	123.189.112.9(辽宁-鞍山)	2	1	3	4	4	4	4	5	5	4	3	5	5	4	3	5	4	4	2	3	5	4	5	4	5	4	4	2	4	3	3	4	3	5	5	4	4	4	5	5	5	4	5	2
723	2025/5/17 18:20:41	207秒	微信	N/A	125.87.93.233(重庆-重庆)	1	1	3	4	5	4	4	4	4	4	4	4	5	4	4	5	4	4	5	5	3	4	4	4	5	4	4	5	3	4	4	5	4	5	4	4	3	4	5	5	5	3	4	3
393	2025/5/17 17:55:21	222秒	微信	N/A	123.189.115.240(辽宁-鞍山)	1	2	7	4	5	4	5	4	4	4	5	4	5	5	5	4	3	5	4	5	5	4	5	4	5	2	4	5	4	5	5	4	5	5	5	5	4	5	5	5	2	5	4	5
798	2025/5/17 18:28:04	290秒	微信	N/A	183.142.59.153(浙江-湖州)	1	2	6	5	3	5	5	5	4	3	4	5	4	5	4	4	4	4	4	4	4	4	5	3	5	3	5	3	4	3	5	2	5	4	4	4	4	4	1	5	4	3	5	3
559	2025/5/17 18:07:29	274秒	微信	N/A	180.105.129.141(江苏-连云港)	1	2	7	5	4	4	4	5	4	5	3	4	4	2	5	5	5	5	4	4	4	4	3	4	5	4	4	4	5	3	4	5	3	4	5	4	3	3	4	2	4	2	4	5
765	2025/5/17 18:24:43	189秒	微信	N/A	120.37.3.71(福建-泉州)	1	2	5	5	5	4	4	3	3	5	4	5	4	4	2	4	5	5	5	4	4	5	4	5	3	4	4	4	5	4	3	5	4	3	5	4	4	4	4	4	4	5	4	3
666	2025/5/17 18:15:36	198秒	微信	N/A	218.6.107.18(福建-莆田)	2	1	3	5	5	4	4	4	4	3	5	5	4	2	5	5	5	5	4	5	4	4	5	4	5	5	4	5	4	4	5	5	2	5	4	5	4	4	4	4	5	4	4	5
1013	2025/5/17 19:00:56	299秒	微信	N/A	220.190.49.201(浙江-温州)	2	2	6	4	5	5	5	4	5	3	4	5	5	5	5	4	4	5	3	5	5	5	4	5	5	5	4	5	5	5	4	5	4	4	5	2	4	4	5	4	4	4	5	5
246	2025/5/17 17:46:20	255秒	微信	N/A	222.189.106.23(江苏-连云港)	1	1	3	5	5	4	5	5	4	4	5	5	3	4	4	1	3	1	3	1	1	5	5	5	5	3	4	4	5	5	4	2	5	5	4	5	4	5	4	5	5	3	3	5
674	2025/5/17 18:16:18	226秒	微信	N/A	125.87.92.150(重庆-重庆)	1	1	3	4	4	3	5	5	5	4	4	5	3	4	5	5	4	4	4	4	4	5	3	4	4	4	4	4	4	2	5	4	5	5	5	4	5	4	4	4	5	5	4	4
997	2025/5/17 18:58:25	196秒	微信	N/A	58.52.141.218(湖北-咸宁)	1	1	2	4	5	2	5	5	5	4	4	4	4	3	5	5	5	4	5	3	5	5	4	4	3	2	5	5	5	5	4	5	4	5	3	5	4	5	4	2	4	5	4	1
852	2025/5/17 18:33:29	204秒	微信	N/A	123.189.112.131(辽宁-鞍山)	2	1	4	5	4	4	4	4	5	5	5	5	5	5	5	5	2	5	4	5	4	4	5	4	5	5	2	4	4	4	5	5	4	4	4	4	4	4	5	4	5	3	5	4
854	2025/5/17 18:33:49	276秒	微信	N/A	125.87.92.26(重庆-重庆)	2	1	2	4	5	5	4	5	2	5	4	4	5	4	5	5	5	2	4	5	5	5	4	5	4	4	5	5	4	4	5	5	4	5	4	4	4	4	4	4	4	5	5	4
928	2025/5/17 18:44:45	266秒	微信	N/A	125.87.94.98(重庆-重庆)	1	1	2	5	5	5	5	4	5	4	4	4	5	4	4	5	5	5	5	5	5	5	5	5	5	4	5	4	4	3	5	5	4	4	5	4	4	5	4	5	4	4	4	5
899	2025/5/17 18:40:18	251秒	微信	N/A	218.87.205.145(江西-抚州)	2	2	7	2	1	5	3	3	5	1	5	2	2	5	4	5	5	2	5	2	5	2	2	1	1	2	4	5	4	4	5	3	5	4	3	4	5	4	4	5	5	5	4	4
673	2025/5/17 18:16:11	291秒	微信	N/A	111.72.198.200(江西-鹰潭)	1	2	5	4	2	4	4	4	4	5	3	4	5	3	2	4	3	3	5	3	5	1	5	1	5	2	3	1	1	3	5	4	5	5	4	5	3	4	4	4	3	4	5	4
331	2025/5/17 17:51:50	289秒	微信	N/A	125.87.94.52(重庆-重庆)	1	2	5	5	4	5	4	4	5	3	4	5	2	5	4	4	3	4	4	3	3	5	4	2	5	2	5	5	4	4	4	3	5	4	5	5	5	4	5	5	3	5	5	5
793	2025/5/17 18:27:27	204秒	微信	N/A	114.229.61.217(江苏-镇江)	1	1	1	4	4	4	5	5	4	3	5	4	3	4	4	5	5	2	5	4	4	4	4	5	5	1	4	5	3	4	5	4	3	4	4	4	4	5	4	2	3	5	5	4
948	2025/5/17 18:48:33	298秒	微信	N/A	183.130.155.206(浙江-温州)	1	2	5	4	4	5	4	5	2	5	4	5	4	5	4	4	4	2	4	5	5	4	4	2	4	5	5	4	4	4	5	4	4	4	3	4	5	4	5	5	4	2	5	5
676	2025/5/17 18:16:29	228秒	微信	N/A	114.229.61.239(江苏-镇江)	1	2	7	1	1	5	3	3	2	2	4	2	2	5	2	2	4	2	3	1	3	2	5	3	1	1	2	2	3	4	4	4	5	5	5	4	4	3	5	4	3	3	1	5
715	2025/5/17 18:20:06	187秒	微信	N/A	111.72.197.134(江西-鹰潭)	2	2	7	3	2	4	3	3	2	3	3	1	4	3	2	2	2	1	5	5	3	2	5	5	5	4	5	5	2	3	5	5	4	5	5	5	4	4	4	4	4	5	4	4
700	2025/5/17 18:18:39	298秒	微信	N/A	125.87.93.29(重庆-重庆)	1	2	5	4	4	2	4	4	4	4	4	4	3	2	2	1	2	4	4	3	5	5	2	2	2	2	5	4	3	4	3	4	5	4	5	5	5	5	4	3	5	4	4	4
762	2025/5/17 18:24:36	262秒	微信	N/A	111.72.197.119(江西-鹰潭)	2	2	5	5	5	2	4	4	4	4	5	4	4	1	5	5	3	4	5	2	3	2	3	1	3	1	4	5	5	5	4	5	5	5	4	5	4	4	5	4	4	5	4	5
969	2025/5/17 18:52:39	209秒	微信	N/A	125.78.219.167(福建-莆田)	1	1	2	4	5	4	5	5	5	5	5	5	5	3	1	2	3	2	5	2	3	2	5	4	4	4	4	5	4	5	5	5	5	4	5	4	5	5	4	5	4	5	4	5
1025	2025/5/17 19:03:40	185秒	微信	N/A	140.237.29.138(福建-莆田)	1	1	2	5	5	4	4	2	5	3	5	5	4	4	4	5	5	3	4	2	4	3	5	4	2	2	4	5	5	5	4	5	3	4	5	3	4	4	4	4	5	4	4	4
611	2025/5/17 18:10:34	214秒	微信	N/A	183.130.245.149(浙江-温州)	1	2	7	5	5	5	5	5	3	5	3	4	4	4	5	5	4	4	4	3	4	5	2	4	5	5	4	4	5	5	4	3	4	4	5	5	4	3	5	4	3	5	5	4
727	2025/5/17 18:21:09	270秒	微信	N/A	110.86.181.165(福建-莆田)	1	2	7	4	3	5	5	4	5	5	4	3	4	5	4	3	4	5	4	5	5	4	5	5	4	4	4	5	4	4	4	5	4	5	5	5	5	4	3	2	5	5	5	5
892	2025/5/17 18:39:08	241秒	微信	N/A	118.113.244.219(四川-成都)	2	2	5	5	5	3	4	4	4	5	5	4	5	5	4	5	5	5	5	5	3	5	4	5	5	5	4	4	3	5	4	5	5	4	5	5	4	5	4	5	4	4	4	4
906	2025/5/17 18:41:17	217秒	微信	N/A	49.79.133.146(江苏-南通)	1	1	3	5	4	4	5	3	5	2	5	5	4	4	4	4	3	2	3	5	3	5	5	2	5	2	4	4	4	4	3	4	5	5	4	4	4	3	3	4	5	4	5	4
1027	2025/5/17 19:04:14	269秒	微信	N/A	114.232.204.86(江苏-南通)	2	2	6	5	2	3	4	3	2	5	3	5	4	5	5	5	5	5	4	5	5	3	5	4	5	5	4	4	5	5	5	4	5	4	5	3	4	4	4	4	5	5	3	4
842	2025/5/17 18:32:22	289秒	微信	N/A	117.86.153.9(江苏-南通)	2	1	2	5	3	4	5	5	5	2	4	5	4	5	5	4	4	5	4	4	5	4	4	4	5	5	5	4	4	4	3	4	4	5	4	4	5	5	5	4	4	5	2	5
612	2025/5/17 18:10:35	264秒	微信	N/A	218.87.205.22(江西-抚州)	1	2	7	5	3	4	5	4	3	5	5	5	3	4	5	3	4	4	4	5	5	5	4	5	5	5	4	5	4	4	4	4	4	4	5	5	5	5	4	5	5	4	4	4
681	2025/5/17 18:16:54	221秒	微信	N/A	122.230.57.73(浙江-湖州)	2	2	4	4	5	4	4	5	4	5	4	5	5	4	5	5	5	3	4	5	5	3	3	4	5	5	5	4	5	3	1	3	3	2	4	5	1	4	1	4	4	4	4	4
328	2025/5/17 17:51:30	220秒	微信	N/A	123.189.112.184(辽宁-鞍山)	1	2	6	5	4	4	4	5	4	5	3	4	4	4	4	4	5	4	3	4	4	2	4	5	4	5	4	3	3	5	4	4	4	4	3	5	4	4	5	5	5	5	5	4
538	2025/5/17 18:06:09	287秒	微信	N/A	59.54.238.167(江西-抚州)	1	2	5	4	4	4	4	5	3	5	4	5	4	5	4	5	4	5	5	3	4	4	4	4	5	4	5	5	4	5	5	5	5	5	4	4	3	4	3	4	4	5	5	2
797	2025/5/17 18:28:03	271秒	微信	N/A	125.87.87.195(重庆-重庆)	1	1	4	5	5	4	5	4	4	4	4	4	4	5	5	4	4	5	4	5	4	5	5	4	2	3	5	4	5	5	4	5	5	4	5	5	2	3	5	2	2	4	4	3
601	2025/5/17 18:09:56	278秒	微信	N/A	223.221.210.121(青海-黄南)	1	1	3	5	5	5	4	3	2	4	5	4	4	4	4	5	5	5	4	4	3	4	2	5	2	4	2	4	3	5	5	4	5	5	4	5	2	3	3	5	4	2	5	4
581	2025/5/17 18:08:45	264秒	微信	N/A	117.28.43.167(福建-泉州)	1	2	6	1	4	4	3	2	1	2	4	3	5	4	5	4	4	5	5	5	5	4	4	5	4	5	5	4	5	3	4	4	5	4	4	4	5	4	4	5	5	3	4	5
655	2025/5/17 18:14:32	224秒	微信	N/A	180.120.9.123(江苏-南通)	2	1	3	3	5	4	3	5	4	5	4	5	5	5	5	2	5	4	4	3	4	5	3	4	5	3	5	4	4	4	4	4	4	4	4	5	3	4	5	4	4	5	5	4
1026	2025/5/17 19:03:44	234秒	微信	N/A	144.255.40.40(山东-烟台)	1	2	6	3	3	5	5	4	2	5	4	5	5	4	4	5	4	3	5	5	4	4	4	4	4	4	4	4	5	4	5	4	5	5	4	4	4	4	5	5	5	5	4	5
1007	2025/5/17 19:00:12	292秒	微信	N/A	122.230.41.7(浙江-湖州)	1	2	5	3	4	5	3	4	5	4	5	4	4	4	4	3	5	4	5	3	5	5	4	5	4	3	5	5	4	4	4	4	5	4	5	5	3	4	5	4	5	4	5	5
760	2025/5/17 18:24:28	264秒	微信	N/A	125.87.92.177(重庆-重庆)	1	2	4	3	5	5	4	5	5	5	5	5	2	5	5	4	4	4	5	4	4	5	3	5	4	4	4	5	5	4	4	4	4	5	5	5	4	3	5	5	4	4	5	4
853	2025/5/17 18:33:34	295秒	微信	N/A	111.72.197.230(江西-鹰潭)	2	2	6	4	5	5	2	4	5	3	5	5	5	5	4	4	5	5	5	5	5	5	5	4	4	4	5	5	5	5	5	4	5	4	5	4	4	5	5	5	5	4	5	5
1032	2025/5/17 19:05:48	208秒	微信	N/A	110.81.48.194(福建-泉州)	2	1	3	1	1	1	3	3	2	3	1	4	5	5	5	4	4	3	4	5	5	4	5	5	4	4	4	4	4	5	3	4	4	4	5	5	4	4	5	5	4	4	4	5
998	2025/5/17 18:58:31	188秒	微信	N/A	180.127.247.99(江苏-连云港)	1	2	7	2	4	4	3	1	4	1	3	1	2	5	4	5	4	5	5	4	4	5	4	4	5	4	5	4	5	4	4	5	4	5	5	5	4	5	4	4	4	4	5	4
588	2025/5/17 18:09:07	256秒	微信	N/A	171.83.248.111(湖北-黄冈)	2	1	3	2	3	4	3	4	4	1	3	1	1	5	5	4	5	4	5	4	4	5	5	5	5	4	4	5	4	2	1	3	3	3	3	5	5	2	1	2	5	4	4	3
791	2025/5/17 18:27:03	242秒	微信	N/A	125.87.91.138(重庆-重庆)	1	2	7	4	4	5	5	4	2	4	4	5	4	5	4	3	4	5	5	4	3	4	5	4	3	4	4	5	2	5	4	2	1	2	5	2	5	3	5	5	5	5	3	4
590	2025/5/17 18:09:15	273秒	微信	N/A	218.87.205.230(江西-抚州)	2	2	5	5	5	4	5	3	5	3	4	5	3	5	4	2	4	4	4	4	5	5	4	5	5	2	3	5	4	4	4	3	5	3	4	4	3	4	2	5	5	5	4	5
990	2025/5/17 18:57:15	237秒	微信	N/A	180.105.234.222(江苏-连云港)	2	1	2	2	3	5	4	5	4	4	5	5	4	5	3	5	3	4	4	5	5	5	4	5	4	4	3	5	5	3	4	4	4	2	5	4	4	5	3	5	5	4	4	5
900	2025/5/17 18:40:37	268秒	微信	N/A	110.86.179.74(福建-莆田)	2	2	6	4	5	5	4	4	3	4	5	4	4	4	4	4	3	5	4	5	5	5	5	5	5	4	3	5	5	5	4	5	5	5	2	2	3	5	4	5	5	5	5	4
919	2025/5/17 18:43:04	193秒	微信	N/A	125.87.92.198(重庆-重庆)	2	1	4	5	4	3	3	5	5	4	4	5	5	5	4	5	5	3	5	4	4	5	5	5	5	4	5	5	4	5	4	4	4	5	5	2	4	5	4	5	5	4	4	2
903	2025/5/17 18:40:56	249秒	微信	N/A	125.87.88.223(重庆-重庆)	1	2	5	5	2	2	5	5	4	4	4	4	4	1	2	2	5	2	5	5	4	1	2	3	3	4	4	1	1	4	5	4	5	4	3	4	4	5	5	4	5	4	5	4
923	2025/5/17 18:43:34	237秒	微信	N/A	125.87.85.222(重庆-重庆)	2	2	5	1	1	5	4	1	5	2	4	1	3	4	5	5	5	4	4	5	4	4	4	5	5	5	3	5	5	4	5	3	5	5	5	4	4	4	4	5	4	4	4	4
767	2025/5/17 18:25:05	190秒	微信	N/A	115.208.68.182(浙江-湖州)	2	1	2	5	3	2	4	4	5	4	5	5	5	5	4	5	5	5	3	5	5	2	5	3	5	5	3	5	4	4	4	4	5	4	5	5	5	5	5	4	5	3	5	5
670	2025/5/17 18:15:52	265秒	微信	N/A	121.206.140.46(福建-三明)	1	1	2	4	4	4	5	5	5	2	4	4	4	4	4	5	5	4	5	5	4	5	4	5	5	5	2	4	4	3	4	4	1	3	1	5	2	2	1	4	4	4	4	4
729	2025/5/17 18:21:13	188秒	微信	N/A	180.105.53.96(江苏-连云港)	1	1	3	4	2	2	5	4	4	5	2	5	5	1	1	1	1	2	2	1	2	2	5	5	3	2	4	4	4	3	4	4	4	5	3	2	4	4	4	5	5	5	4	5
455	2025/5/17 18:00:36	216秒	微信	N/A	125.87.90.115(重庆-重庆)	1	2	7	2	3	2	2	2	3	1	4	3	2	4	3	2	4	4	1	4	1	2	5	3	4	4	5	5	4	4	4	4	2	4	4	4	3	4	4	4	4	5	4	4
185	2025/5/17 17:42:22	294秒	微信	N/A	111.72.195.207(江西-鹰潭)	2	2	6	3	5	1	4	3	1	3	1	3	2	3	2	3	4	2	2	4	5	4	5	5	4	5	5	5	4	5	4	4	4	5	4	4	5	5	4	4	5	5	4	4
591	2025/5/17 18:09:16	279秒	微信	N/A	111.72.196.89(江西-鹰潭)	1	2	7	5	5	5	5	3	5	4	3	2	4	4	5	4	4	4	1	2	3	5	4	2	4	3	5	5	3	5	5	5	5	4	4	5	5	5	4	5	4	2	5	5
620	2025/5/17 18:11:09	229秒	微信	N/A	111.72.128.111(江西-宜春)	2	1	2	1	1	5	2	3	5	3	4	1	2	5	4	4	4	5	4	5	5	5	5	4	5	4	5	5	4	1	2	3	2	4	1	4	4	4	2	5	5	5	4	3
701	2025/5/17 18:18:45	231秒	微信	N/A	110.81.48.129(福建-泉州)	2	2	5	5	2	4	4	5	5	3	5	4	4	4	5	4	4	4	3	3	4	4	4	2	5	5	3	4	3	2	4	3	5	5	4	4	3	2	4	4	5	5	4	4
858	2025/5/17 18:34:35	324秒	微信	N/A	112.194.90.96(四川-自贡)	2	2	7	5	3	3	1	5	4	1	5	3	2	5	4	5	5	4	5	5	4	4	4	4	5	5	4	5	4	4	4	5	5	5	3	5	4	3	4	4	4	5	5	5
938	2025/5/17 18:46:39	278秒	微信	N/A	144.255.40.185(山东-烟台)	1	1	3	5	4	5	2	5	4	4	5	4	5	4	4	4	3	5	2	4	4	5	2	5	4	5	5	4	4	4	5	4	2	4	4	5	4	5	4	5	3	5	3	3
904	2025/5/17 18:41:00	293秒	微信	N/A	144.255.40.166(山东-烟台)	2	1	4	2	5	4	4	4	5	4	4	5	5	5	5	4	3	4	5	4	5	4	5	3	4	5	5	5	4	4	4	4	5	5	4	4	5	4	3	5	5	4	5	4
930	2025/5/17 18:45:06	216秒	微信	N/A	218.87.205.36(江西-抚州)	1	2	7	4	5	4	4	5	4	5	4	5	4	4	5	5	3	4	5	4	5	5	5	5	4	4	5	2	4	4	5	4	4	5	5	4	4	3	4	3	5	4	5	4
825	2025/5/17 18:30:41	257秒	微信	N/A	140.250.148.87(山东-济南)	2	1	1	3	4	5	5	5	4	4	3	5	5	5	4	5	5	4	5	4	4	5	4	5	4	4	5	3	4	5	3	4	5	5	4	4	5	4	4	4	4	5	5	5
724	2025/5/17 18:20:52	190秒	微信	N/A	125.87.86.159(重庆-重庆)	1	2	7	4	3	4	5	4	5	4	4	4	4	5	5	4	5	5	5	5	5	5	5	4	4	4	4	4	4	4	4	5	5	5	3	5	5	4	4	5	5	4	5	5
665	2025/5/17 18:15:31	246秒	微信	N/A	125.87.95.93(重庆-重庆)	1	1	4	5	5	5	4	2	5	4	5	5	4	5	5	4	4	4	3	5	5	5	5	4	4	4	5	5	4	5	4	5	5	5	4	5	5	5	4	5	4	4	4	4
986	2025/5/17 18:56:22	204秒	微信	N/A	121.206.142.50(福建-三明)	1	1	1	5	4	5	5	4	5	5	5	4	3	5	5	4	4	5	5	4	3	5	5	4	5	3	5	4	5	5	3	5	4	4	5	4	5	4	3	3	5	4	5	5
931	2025/5/17 18:45:19	294秒	微信	N/A	111.179.76.56(湖北-咸宁)	2	1	1	4	5	3	3	4	5	5	4	5	5	3	4	5	5	5	5	4	4	5	5	5	5	5	4	5	5	4	4	4	3	4	4	5	4	5	4	4	5	4	4	5
962	2025/5/17 18:51:24	288秒	微信	N/A	111.179.78.164(湖北-咸宁)	1	2	6	4	5	5	3	5	5	4	5	5	5	4	5	5	4	5	5	5	5	5	4	5	4	4	5	4	4	3	5	4	5	3	5	3	4	5	5	5	4	5	2	4
555	2025/5/17 18:07:04	203秒	微信	N/A	220.190.50.69(浙江-温州)	1	1	3	5	3	4	5	4	4	5	5	5	5	4	5	4	5	5	2	4	4	4	4	3	5	4	5	4	5	5	4	4	5	3	4	4	4	5	4	4	5	5	5	5
885	2025/5/17 18:38:14	260秒	微信	N/A	59.58.104.83(福建-莆田)	1	2	6	5	5	4	4	5	5	4	4	4	4	4	5	4	3	5	5	4	4	4	5	5	4	4	4	4	5	4	5	4	3	4	5	5	4	5	4	5	4	5	4	4
924	2025/5/17 18:43:38	255秒	微信	N/A	117.86.174.9(江苏-南通)	1	1	4	3	4	5	5	5	3	5	5	4	5	5	3	4	5	4	3	4	4	5	3	4	4	5	5	4	5	4	4	4	4	5	5	4	5	4	5	4	5	4	5	5
1012	2025/5/17 19:00:47	278秒	微信	N/A	125.87.87.28(重庆-重庆)	1	1	4	5	5	4	4	5	3	5	4	5	4	4	2	4	4	5	4	5	4	5	4	4	4	5	4	5	3	2	4	5	5	5	5	5	4	5	5	4	5	5	5	3
592	2025/5/17 18:09:23	282秒	微信	N/A	222.189.106.38(江苏-连云港)	2	1	3	5	4	5	5	4	5	5	4	4	5	5	4	4	4	4	4	4	4	5	4	5	3	4	4	5	5	5	5	4	4	5	3	5	4	3	5	4	5	5	5	4
682	2025/5/17 18:16:57	261秒	微信	N/A	183.130.154.123(浙江-温州)	2	1	2	4	5	5	5	5	4	5	3	5	4	5	5	4	4	5	4	4	5	3	5	4	4	4	5	4	5	4	5	5	5	5	4	4	4	4	4	4	5	4	3	4
[truncated: 62 more columns]
